# Supplementary material for: Heterogeneous Evolution of Sex Chromosomes in the Torrent Frog Genus Amolops
Source: MDPI journal article supplement (doi:10.3390/ijms231911146), 2022-09-22

#### File S4

PCR validation partial results of sex linkage sites for *Amolops* (*A. Chunganensis*, *A. jinjiangensis*, *A. lifanensis*, *A. loloensis*, *A. mantzorum*, *A. sp.*, *A. tuberodepressus*, *A. wuyiensis*, *A. xinduqiao*). The variable loci of males were shown in blue boxes, and the variable loci of females were shown in black boxes. Female individuals were indicated by ♀ and male individuals used ♂. The polymorphic sites of locus show heterozygosity and homozygosity in all male individuals and female individuals, respectively.

*A. Chunganensis* (Clocus\_1058318)

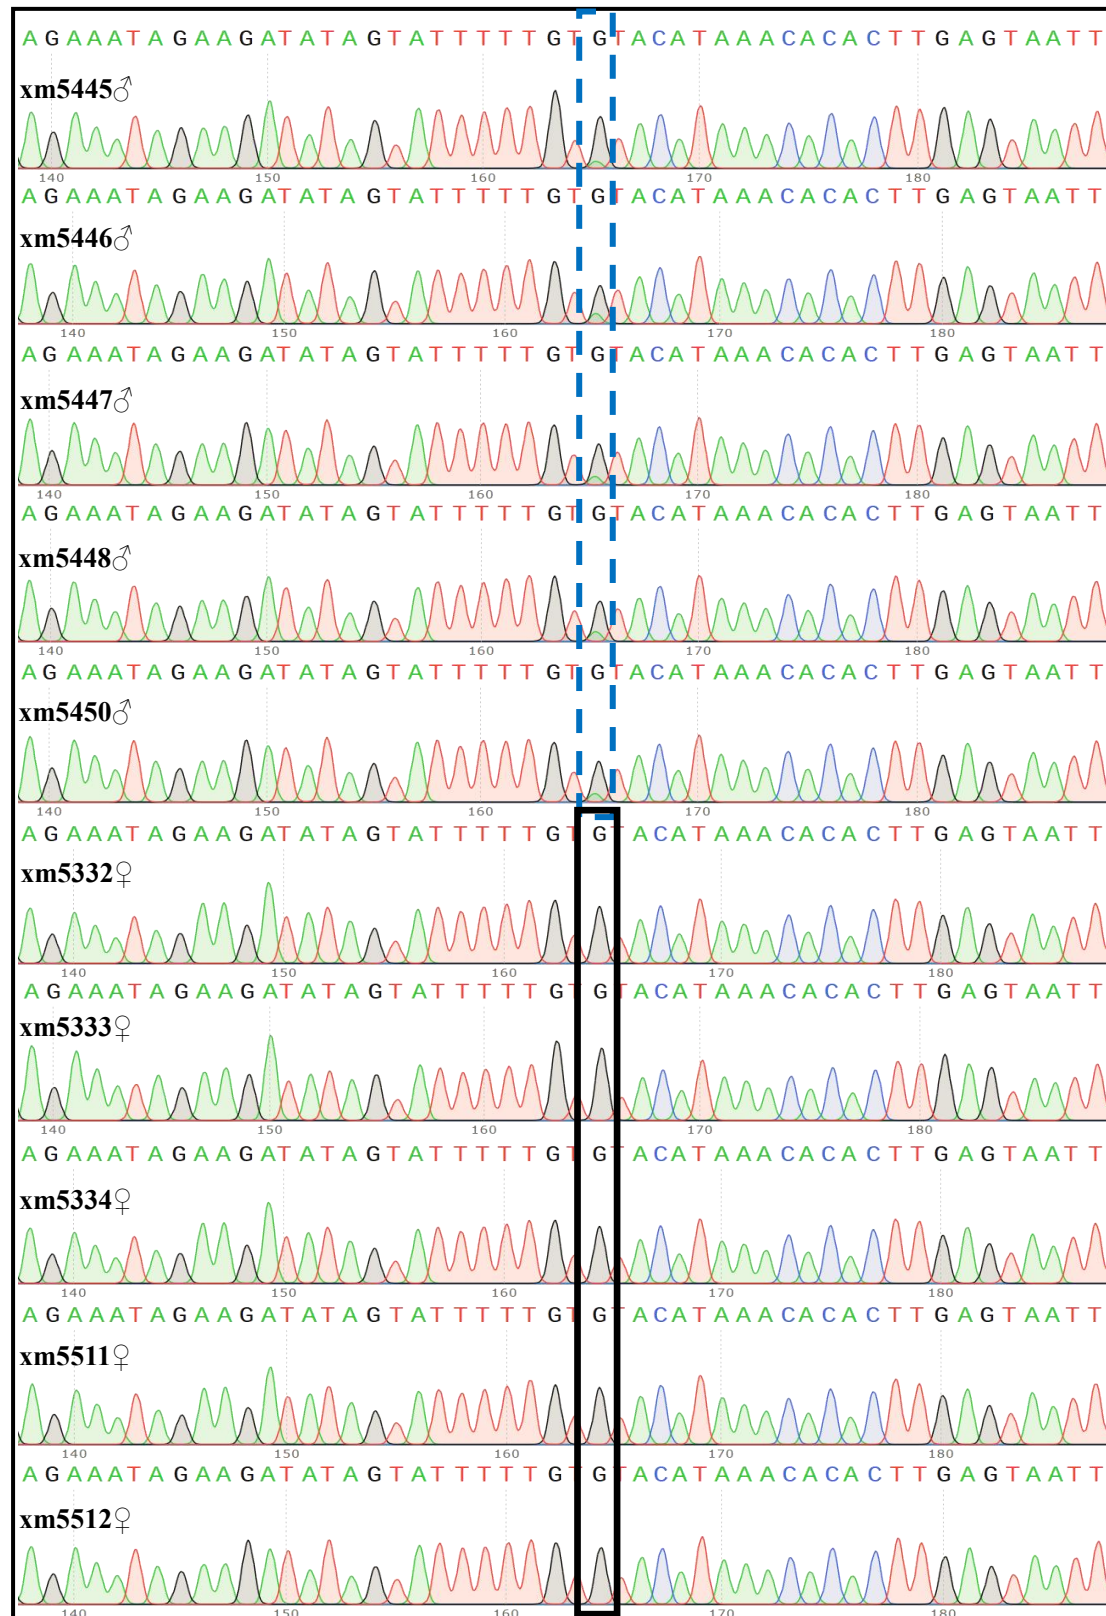

*A. Chunganensis* (Clocus\_2909840)

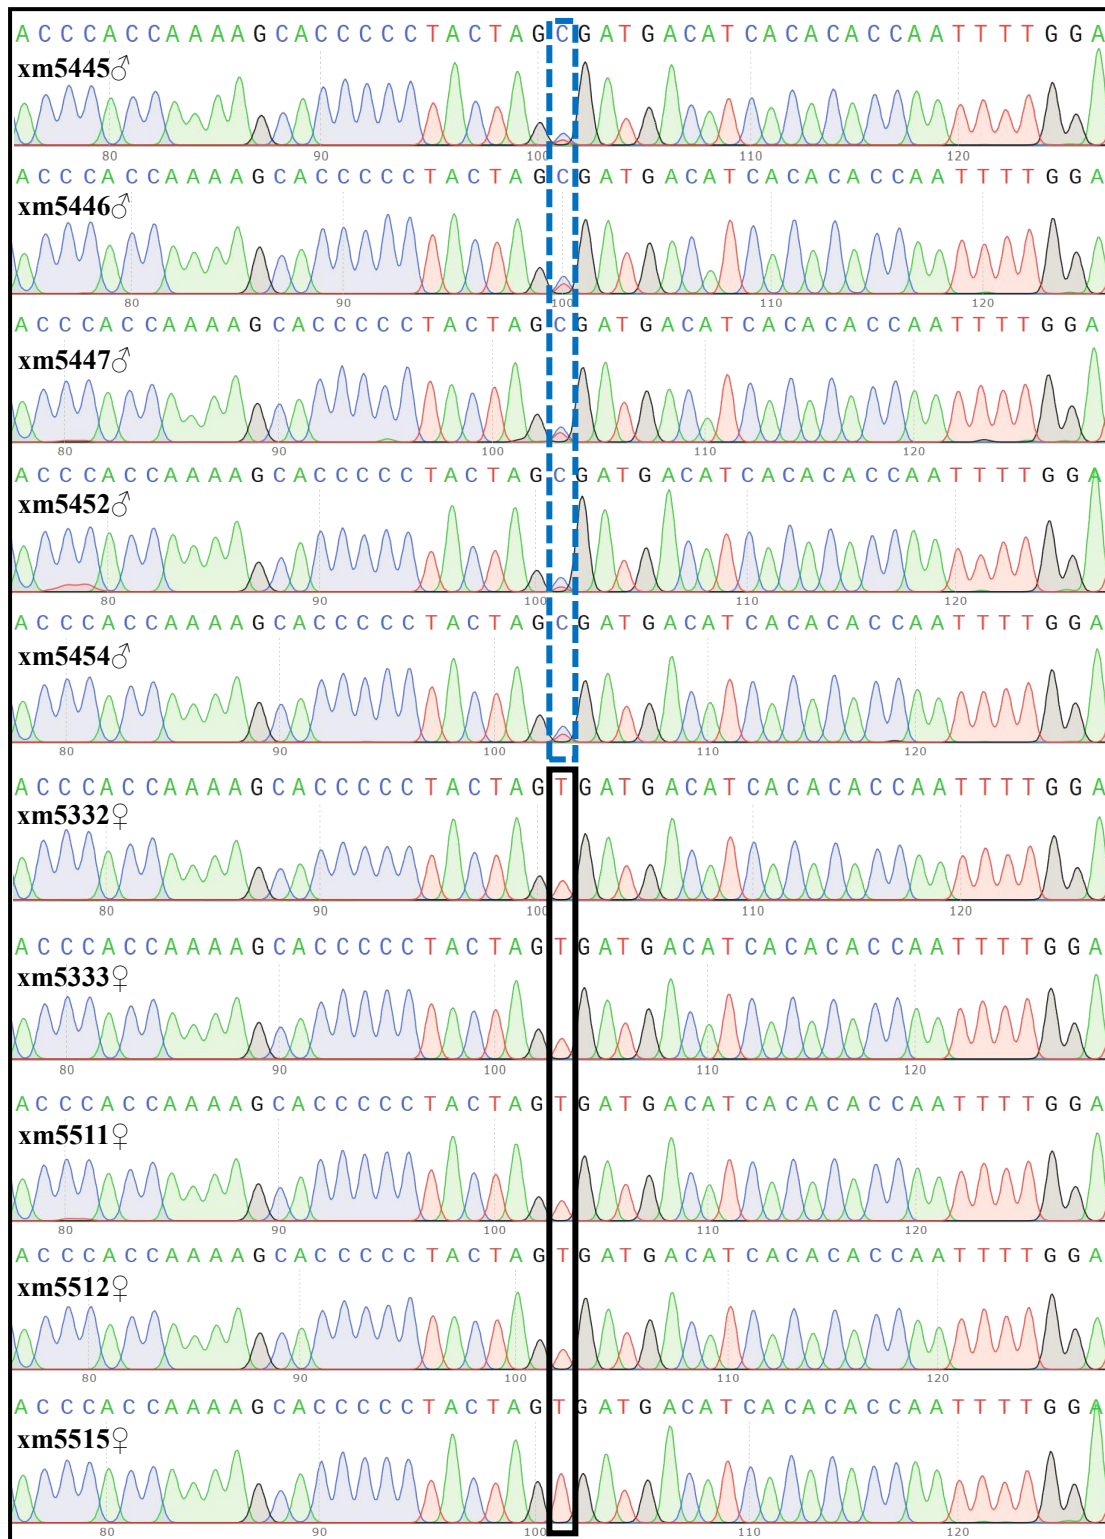

*A. jinjiangensis* (Clocus\_483348)

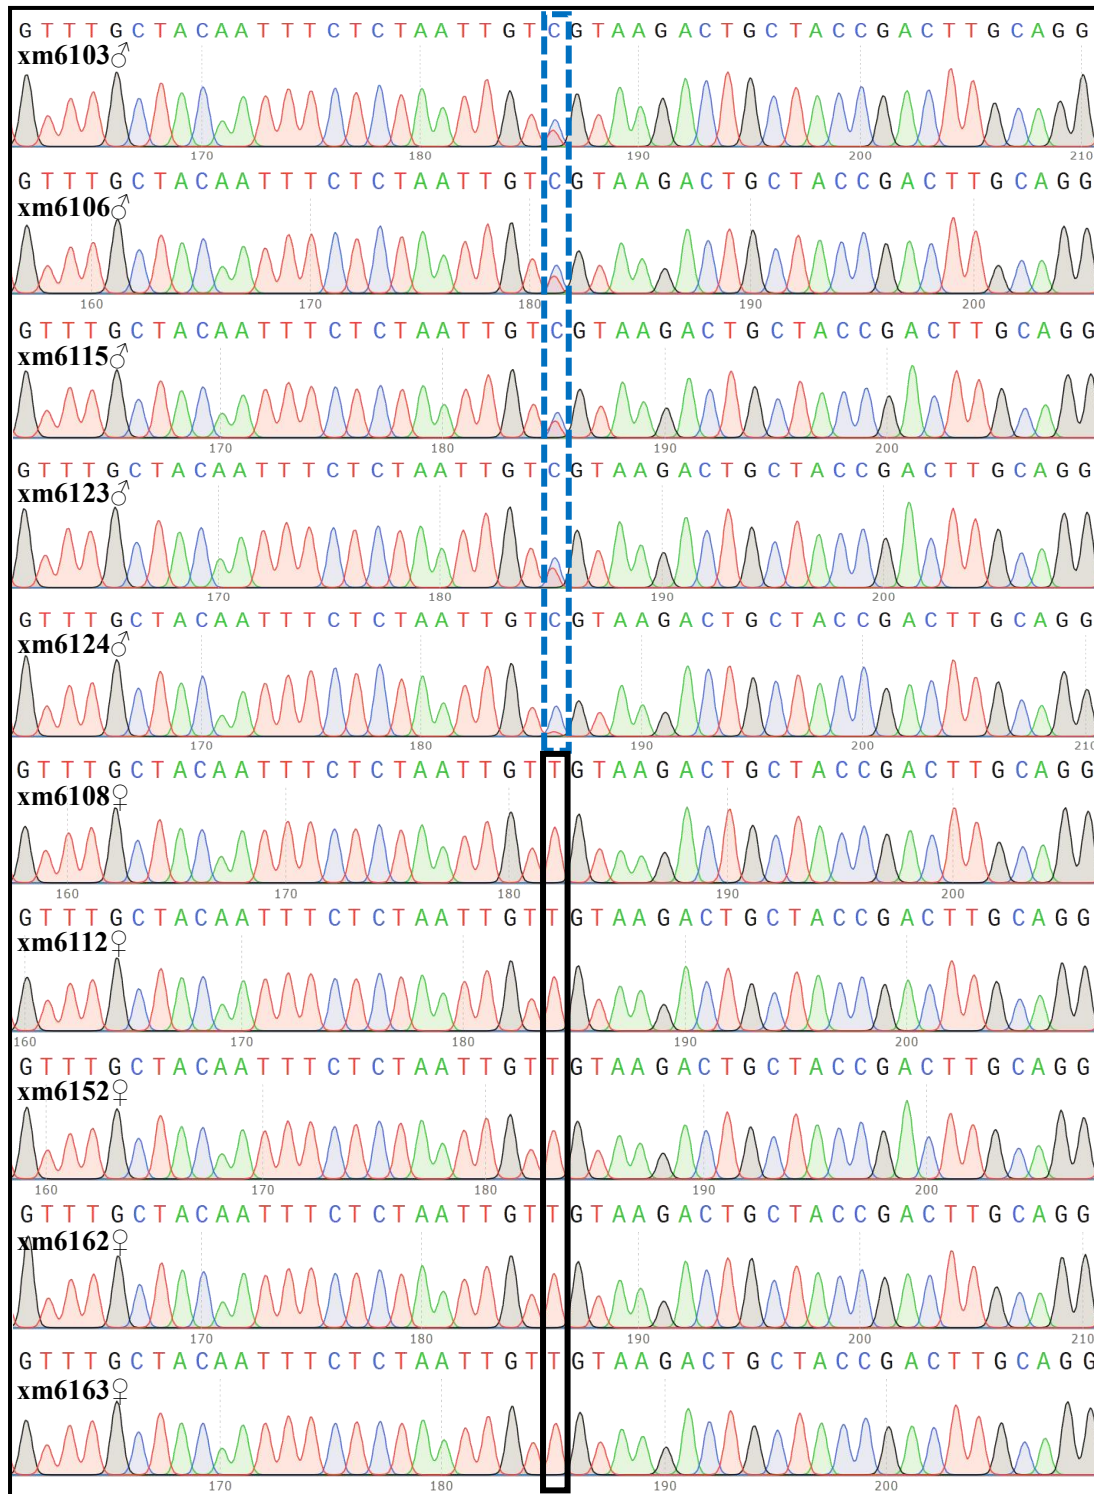



*A. jinjiangensis* (Clocus\_1184383)

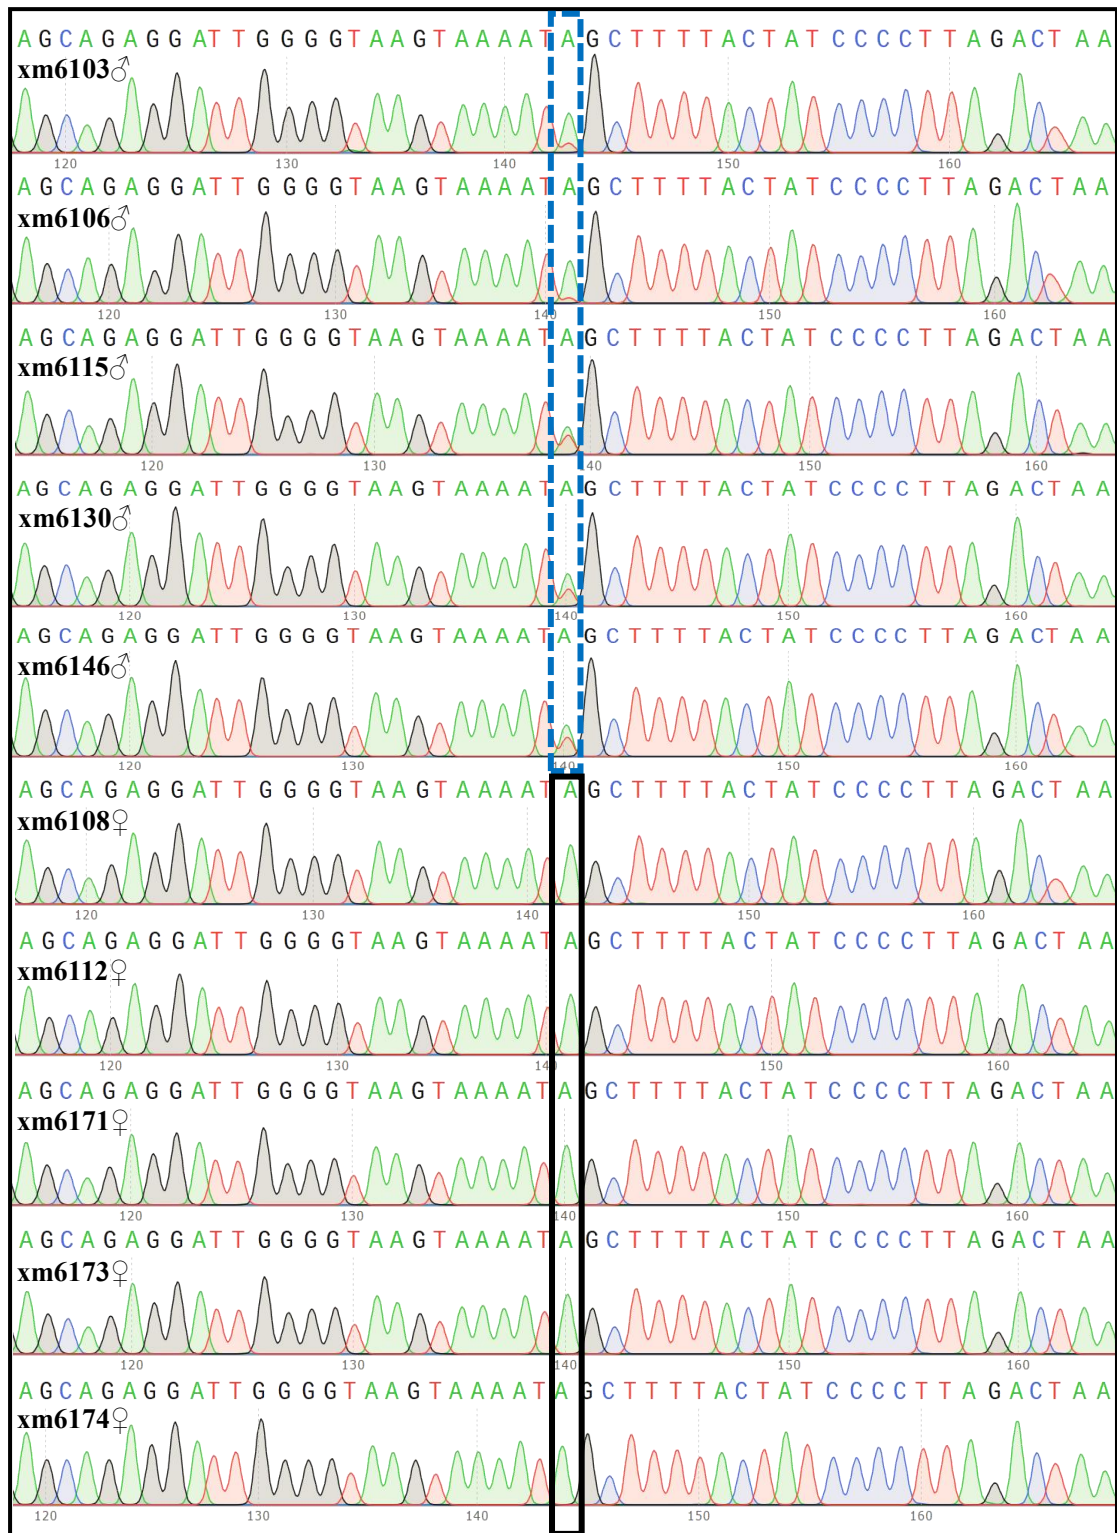

*A. lifanensis* (Clocus\_174627)

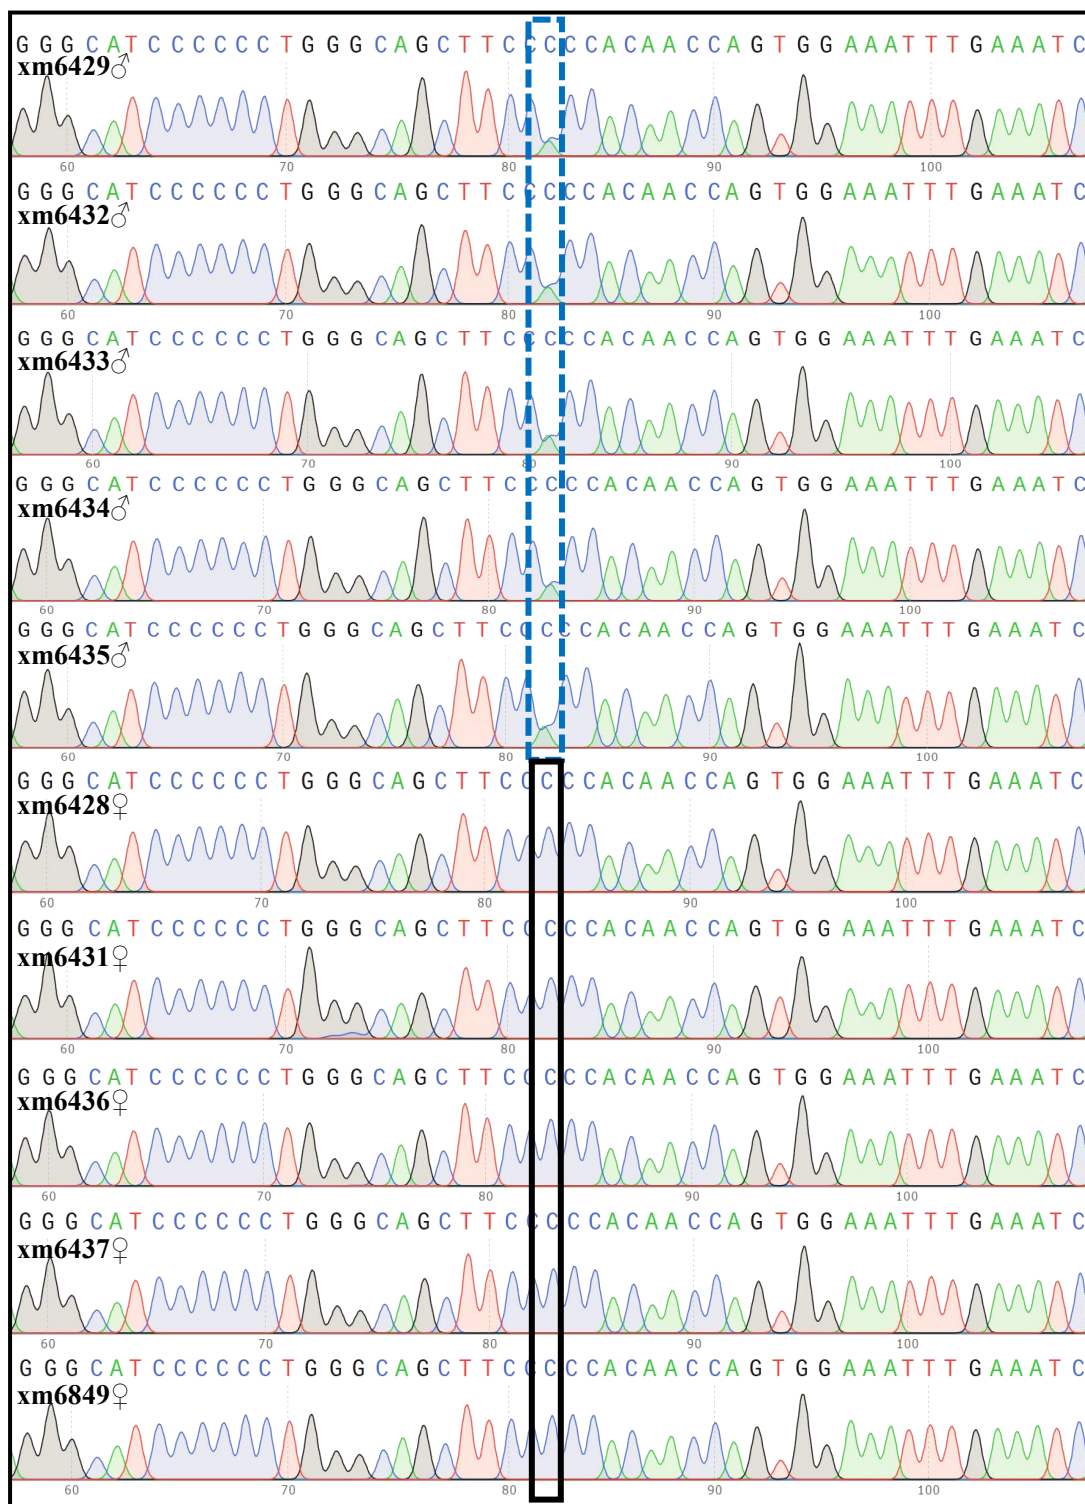

*A. lifanensis* (Clocus\_375069)

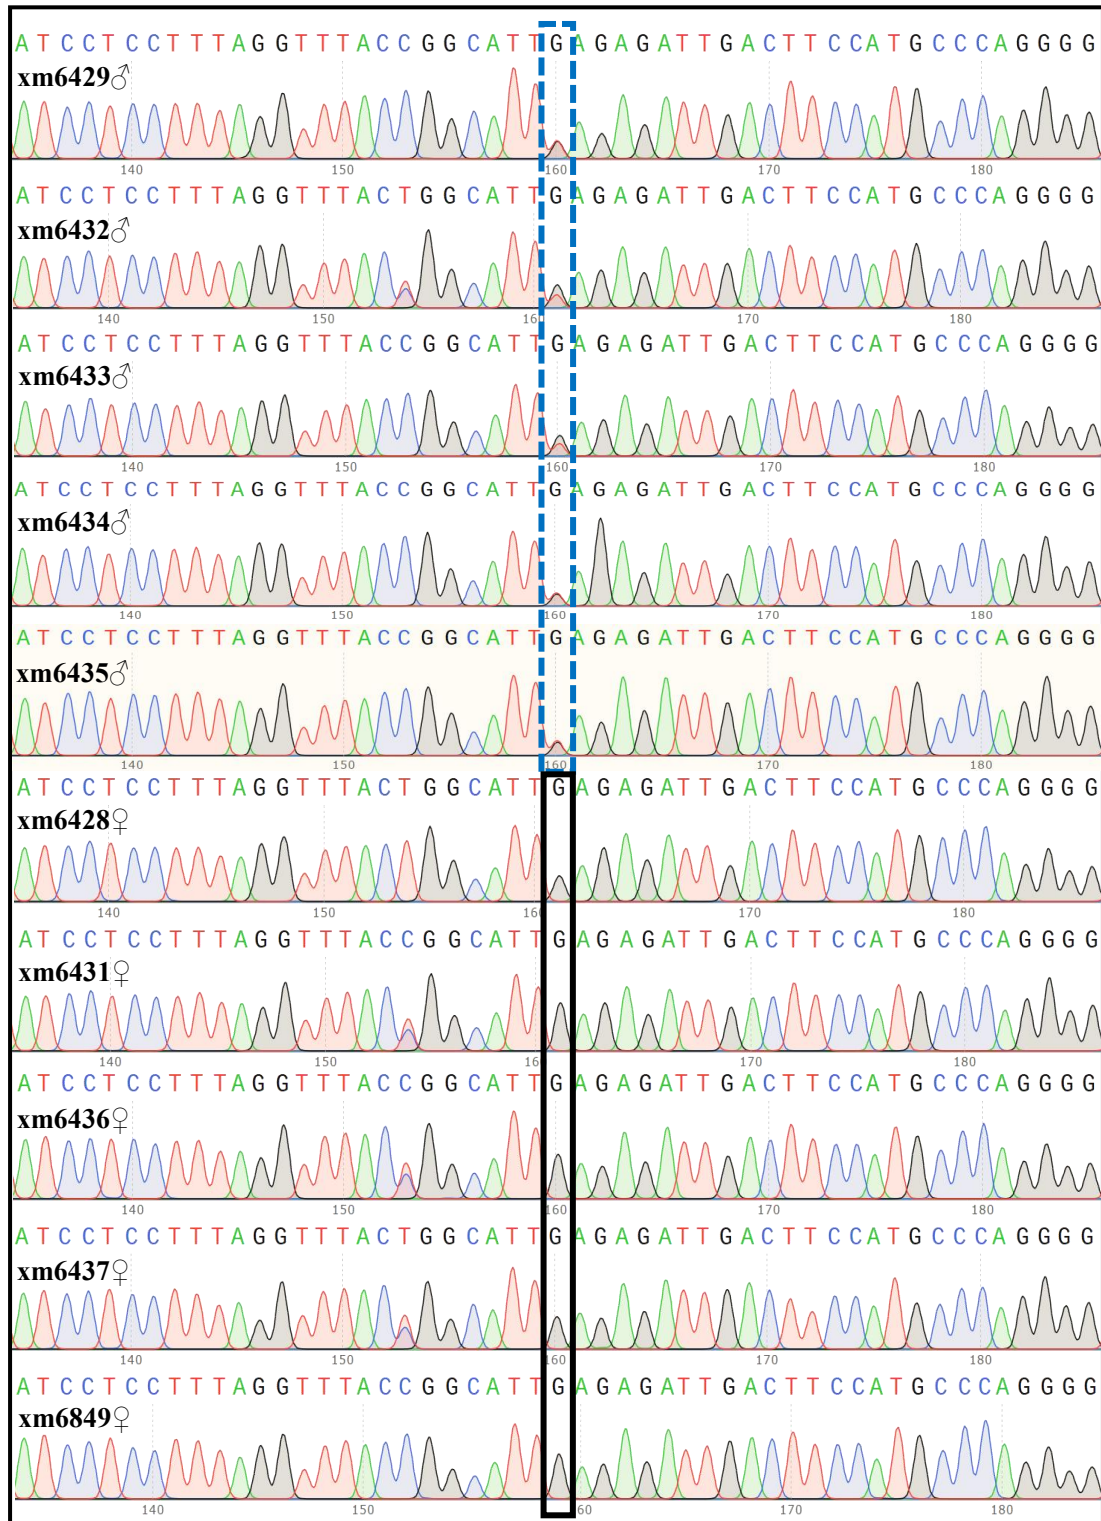



*A. lifanensis* (Clocus\_430733)

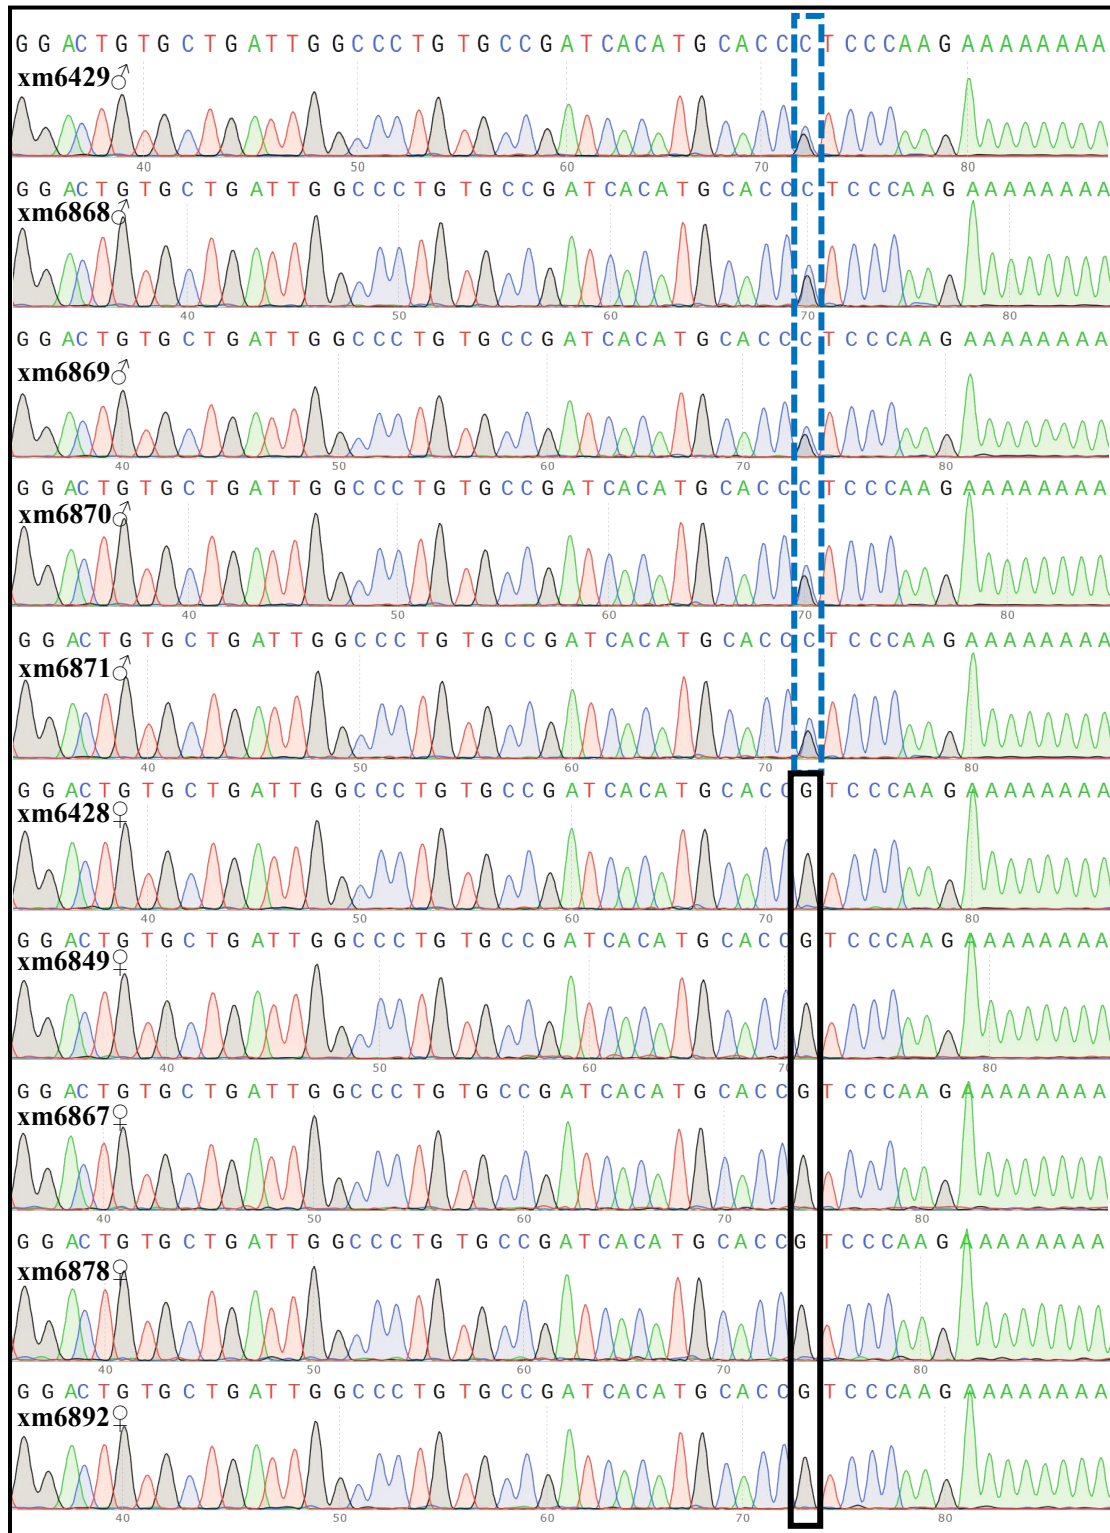



*A. loloensis* (Clocus\_550969)

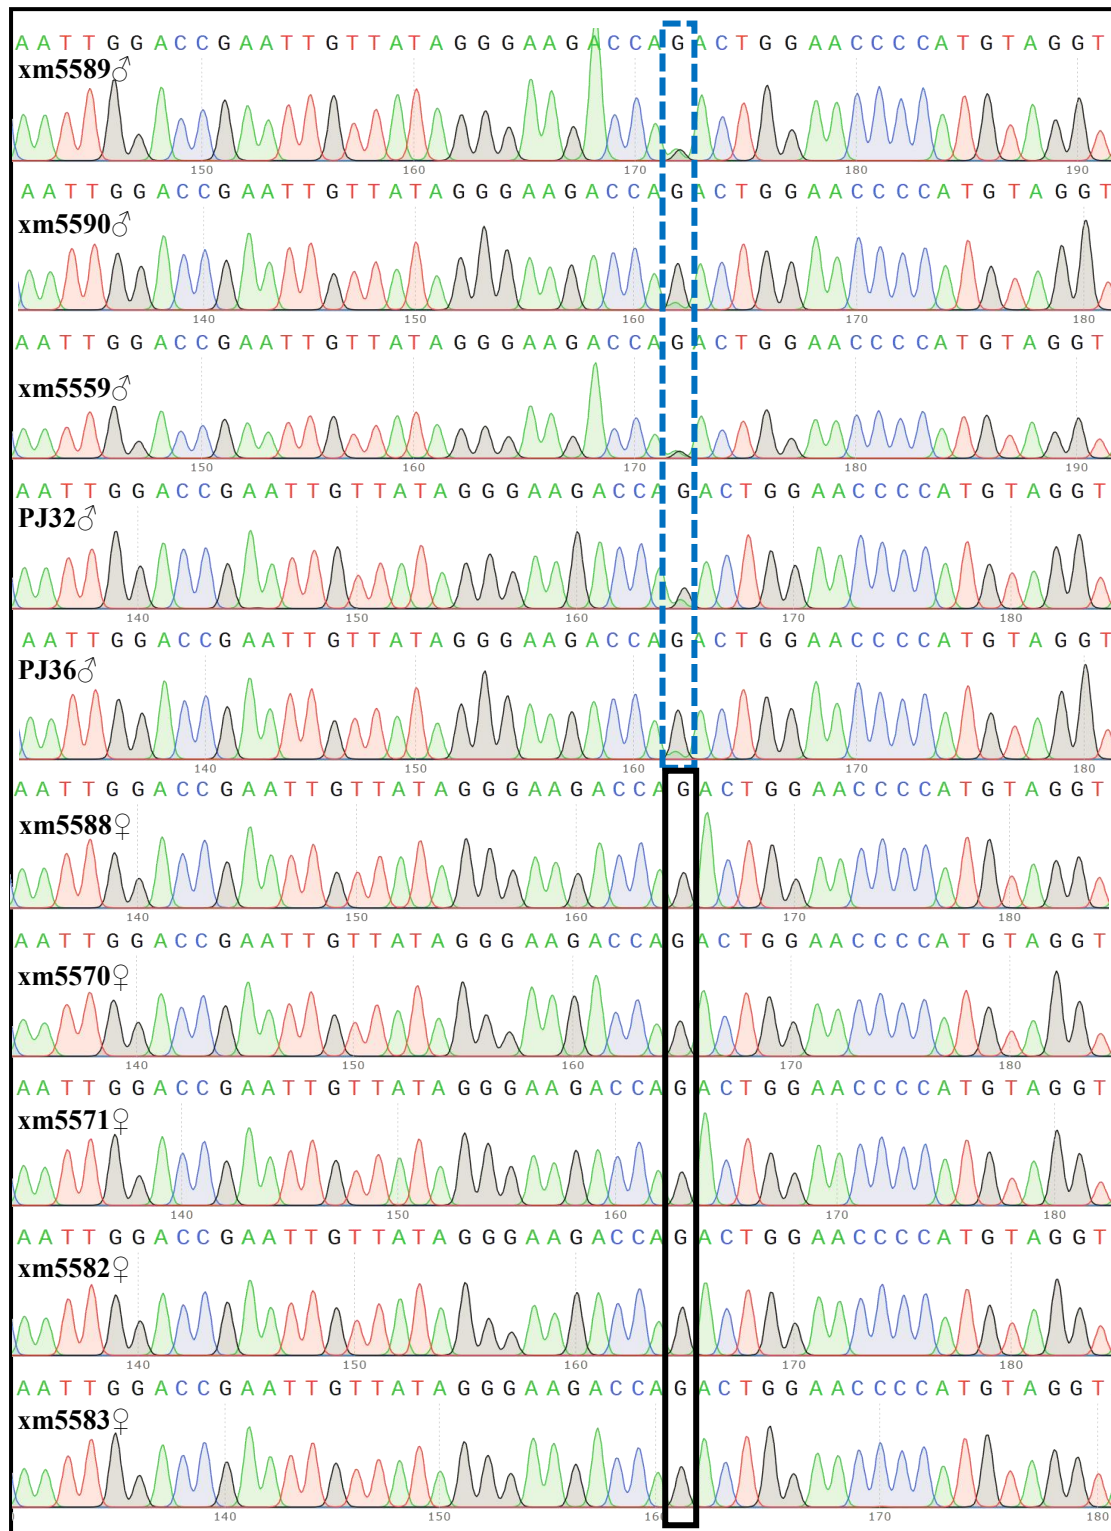

*A. mantzorum* (Clocus\_85869)

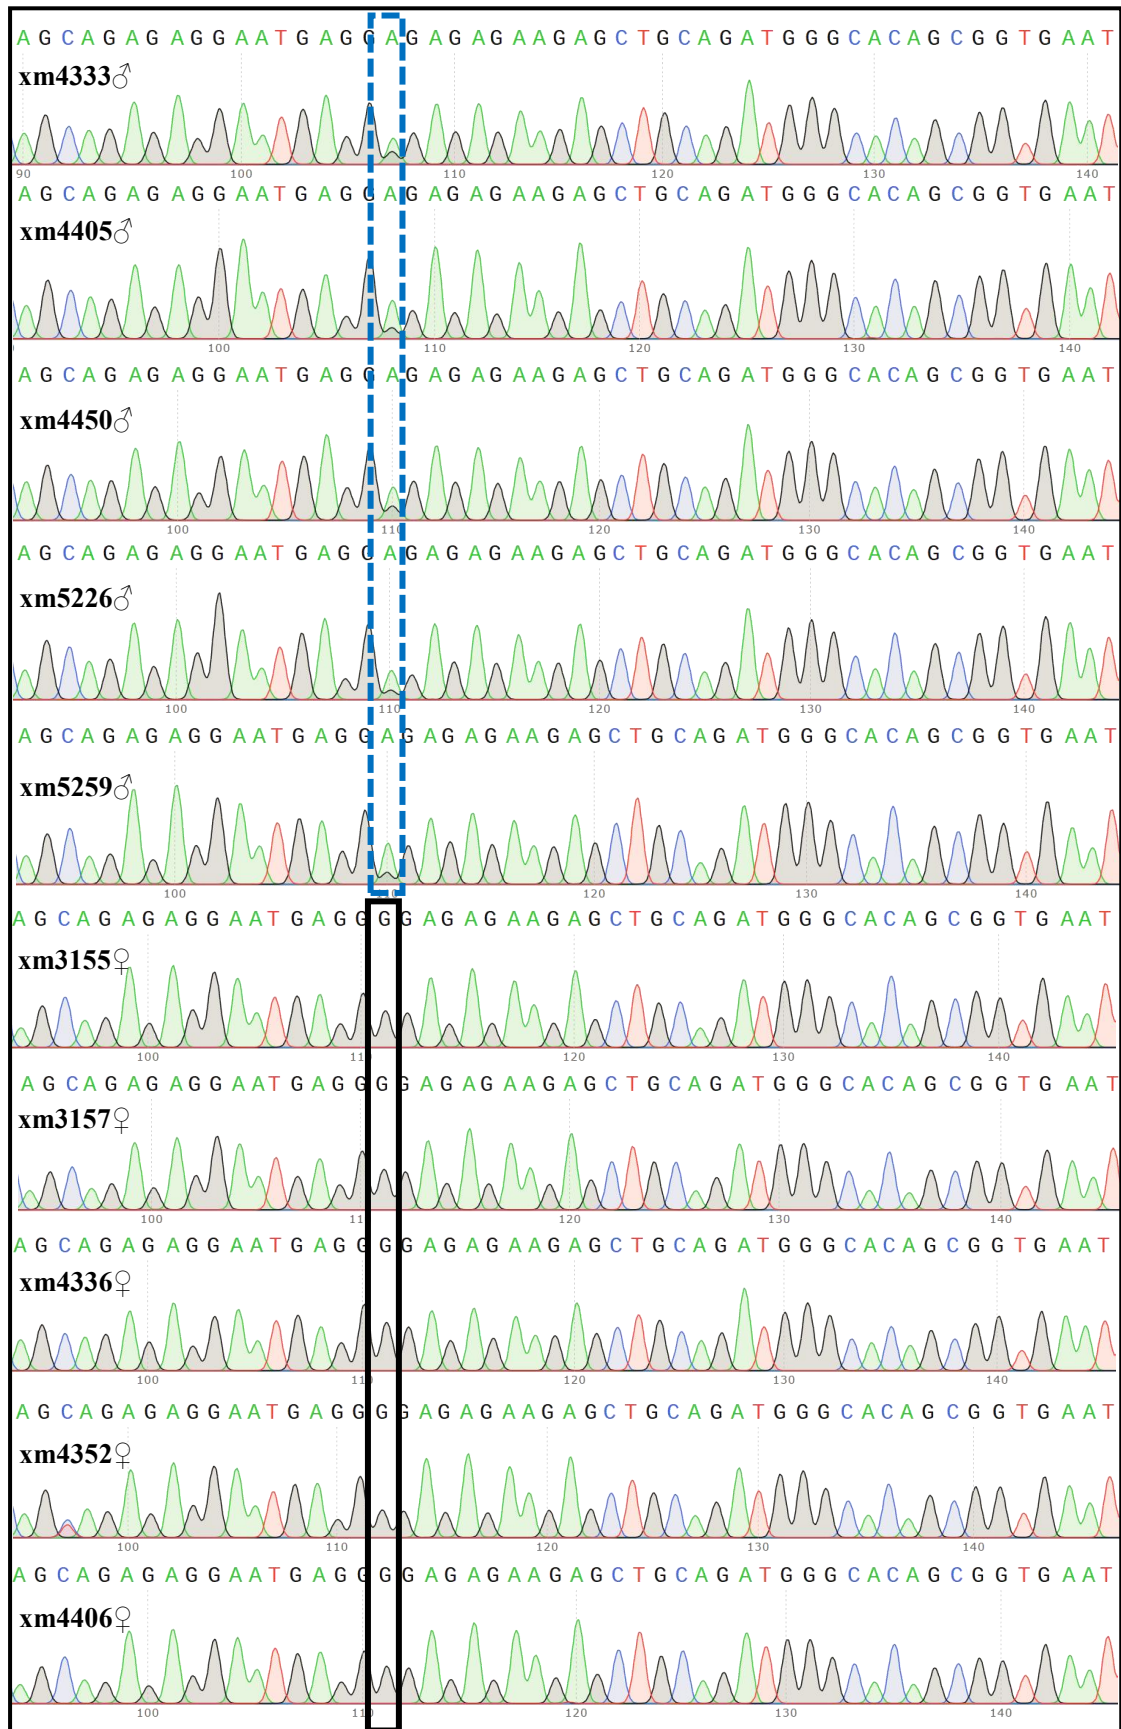

**A. sp. (Clocus\_110086)**

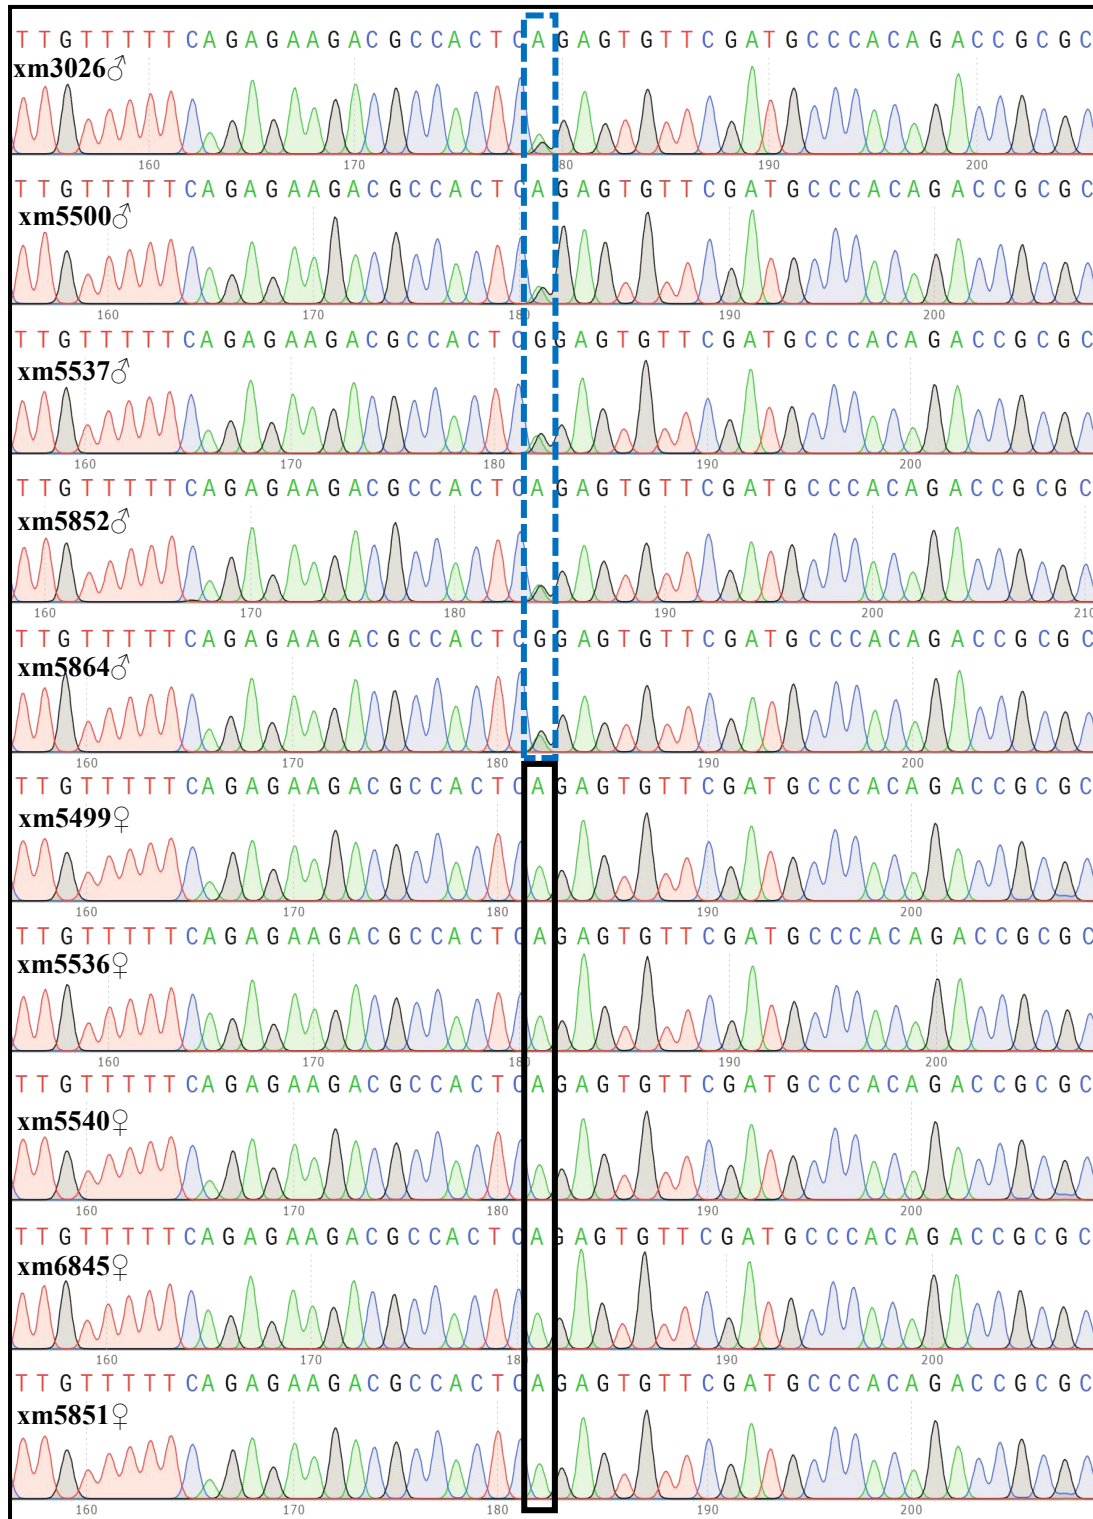



***A. sp.* (Clocus\_208821)**

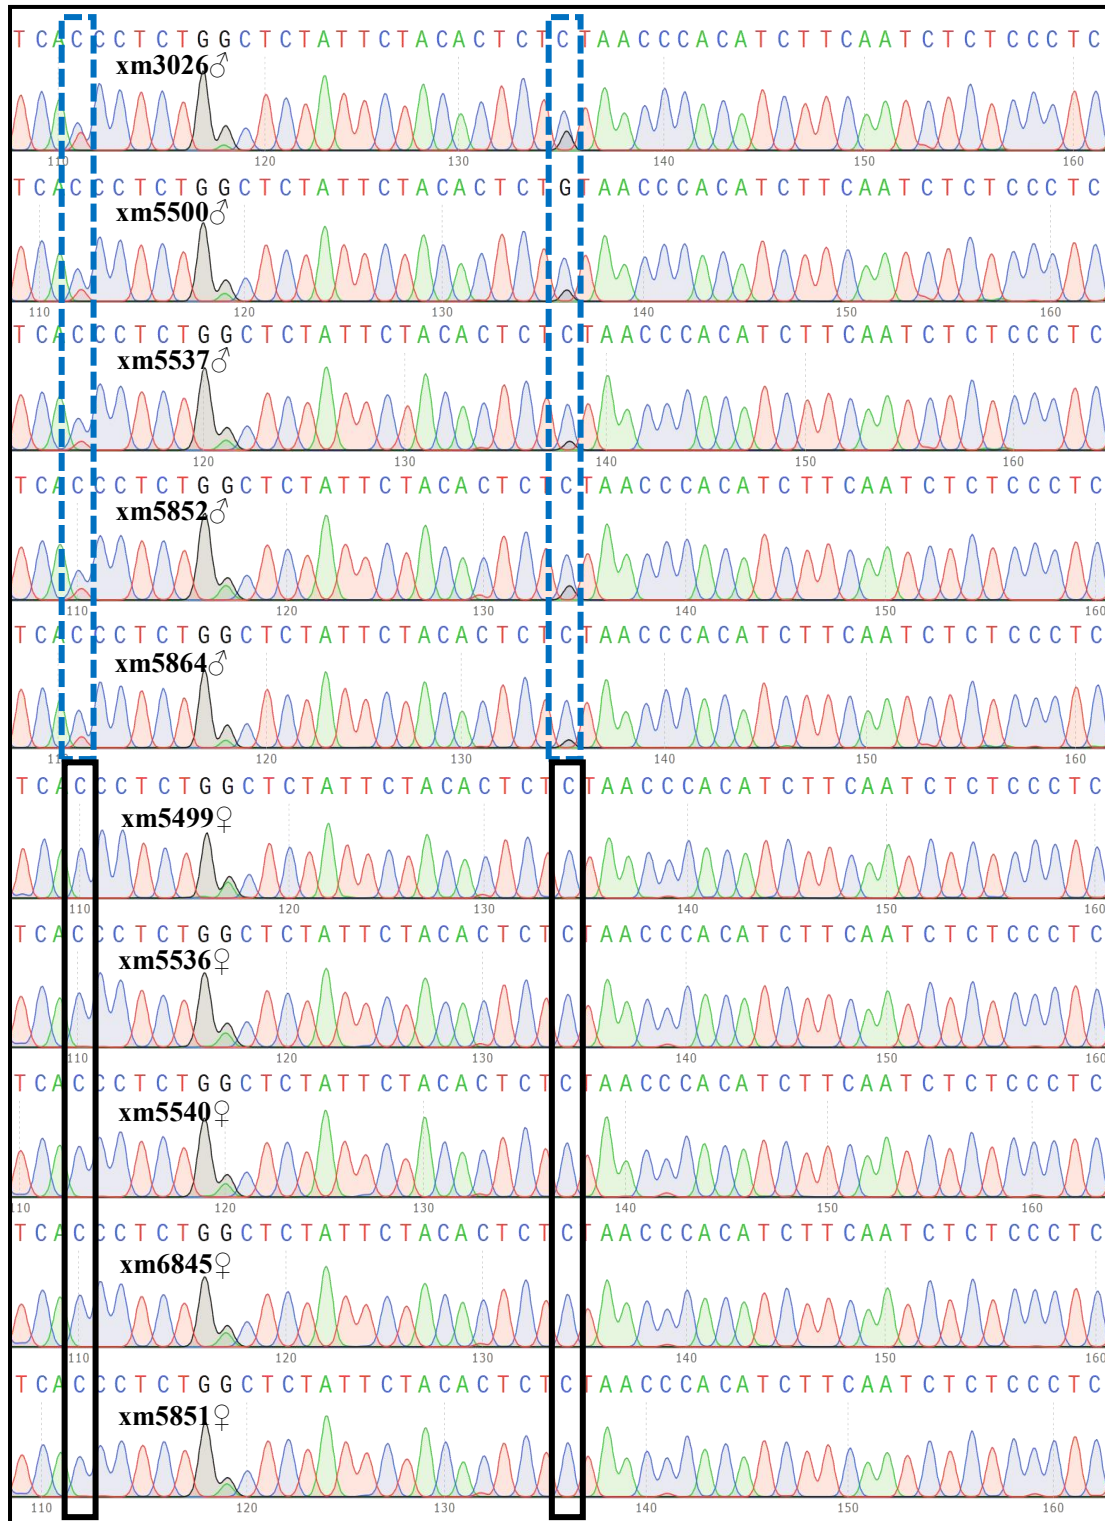



**A. sp. (Clocus\_271488)**

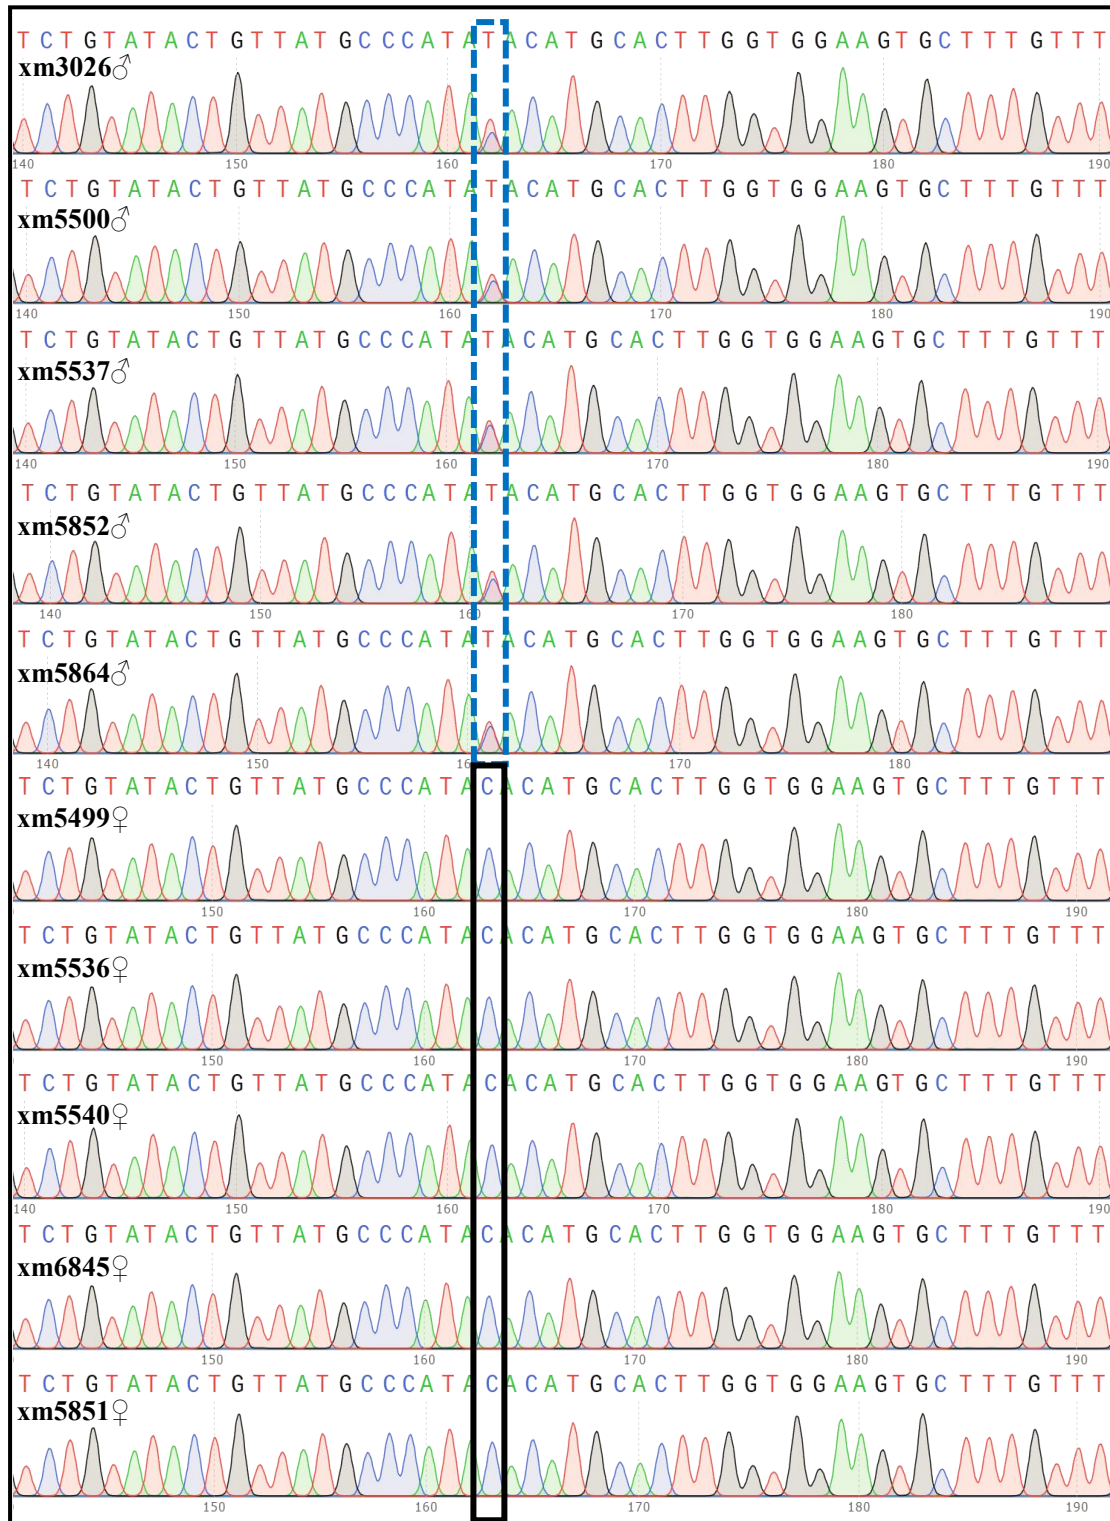

**A. sp. (Clocus\_476103)**

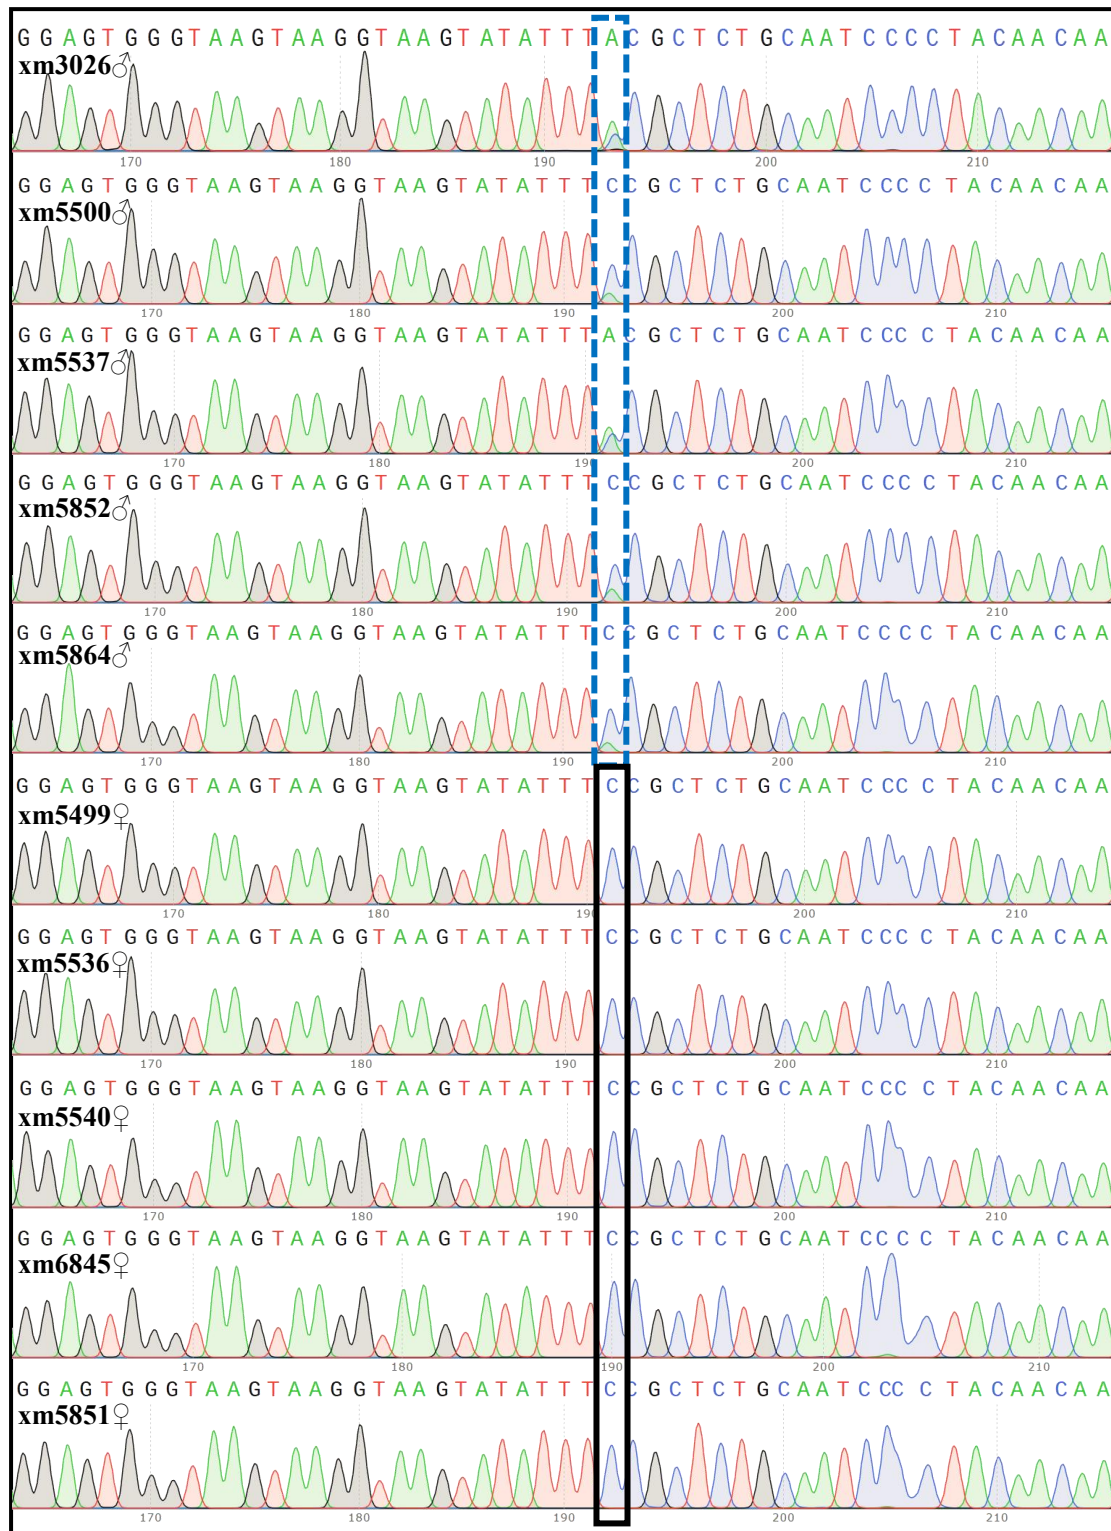

***A. sp.* (Clocus\_1399857)**

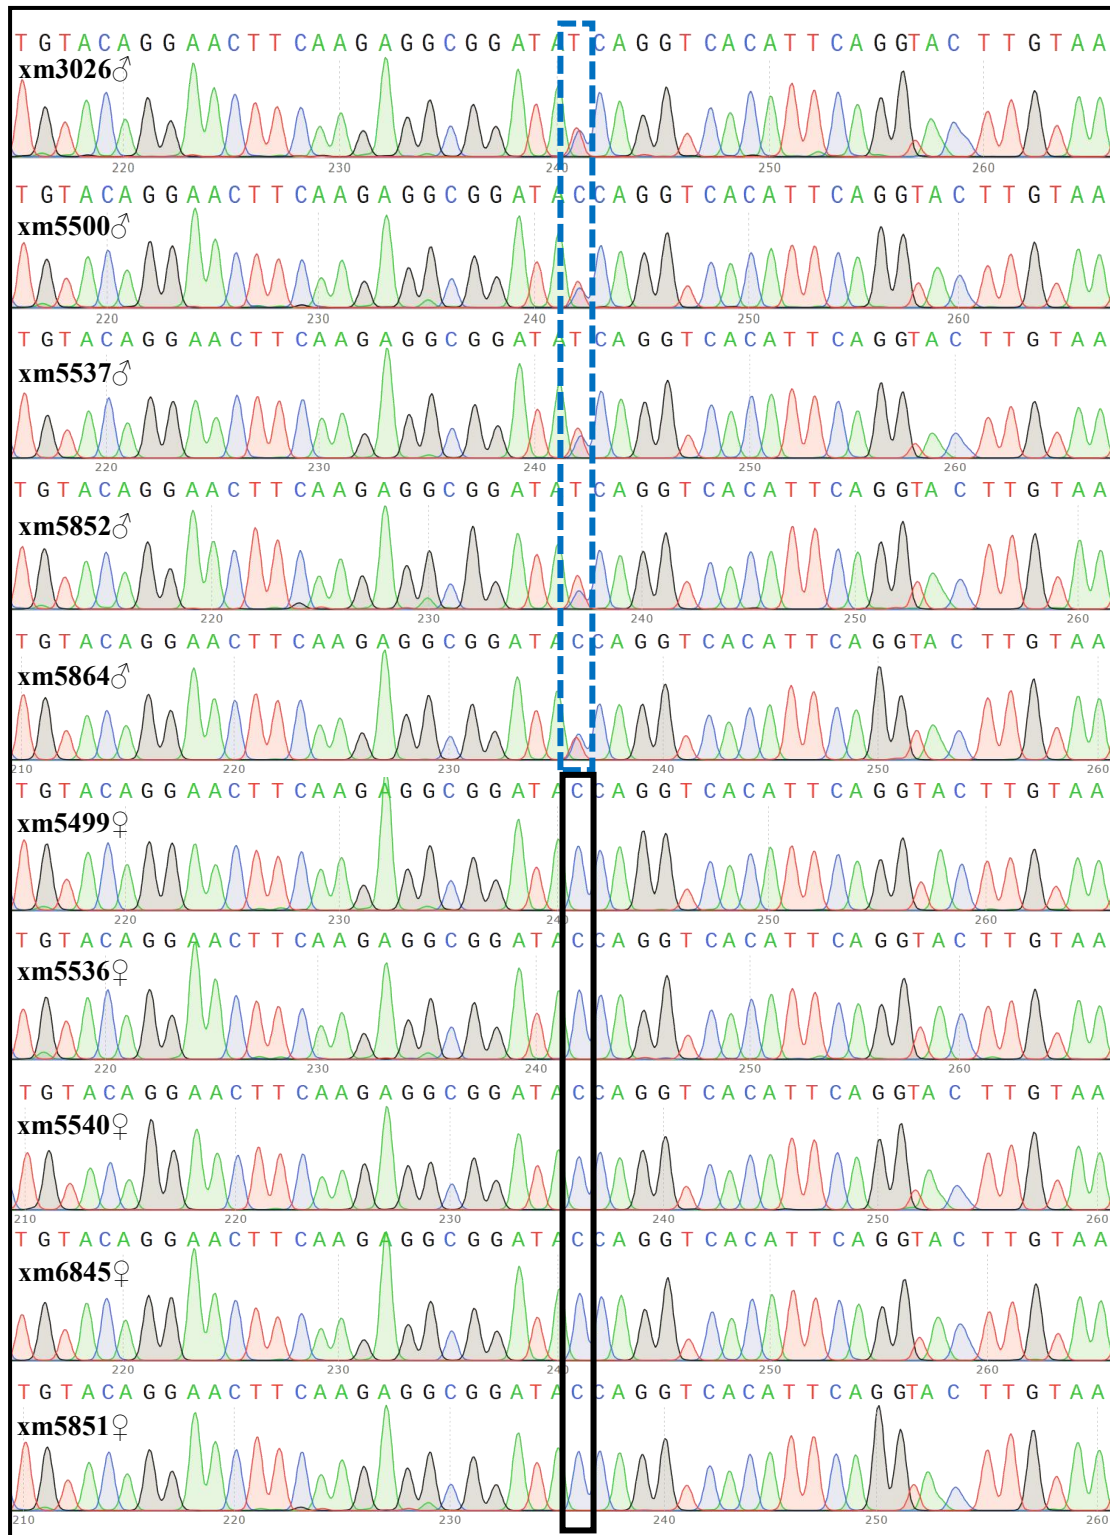



*A. tubero depressus* (Clocus\_1007365)

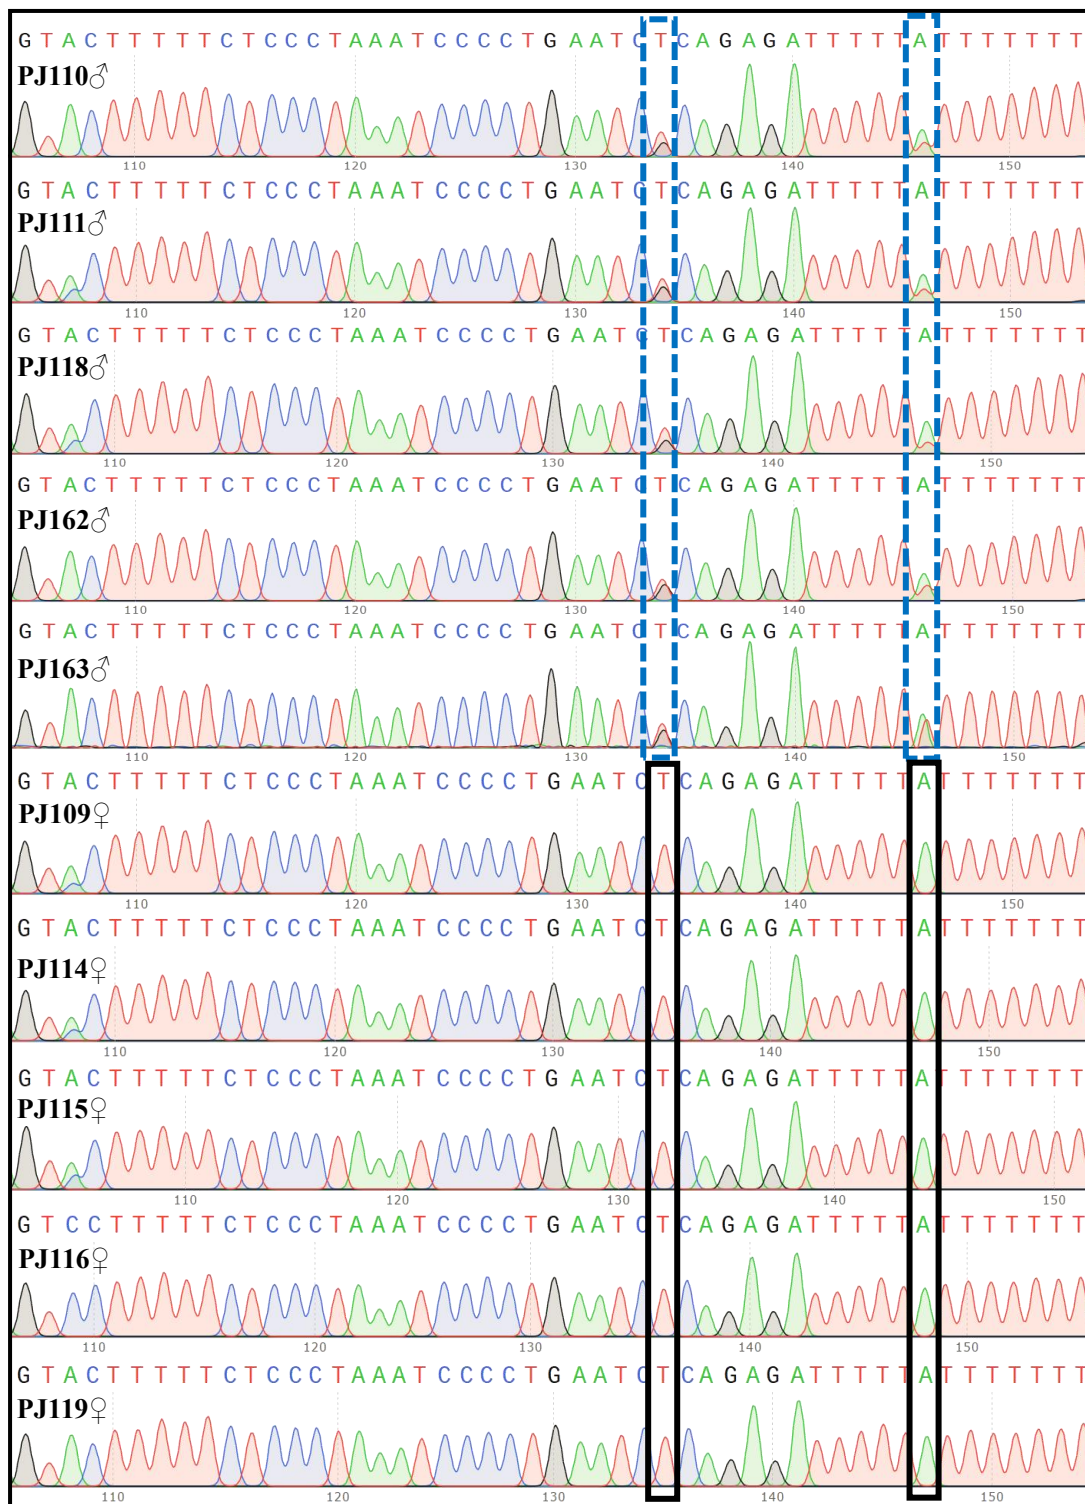



*A. tubero depressus* (Clocus\_1150683)

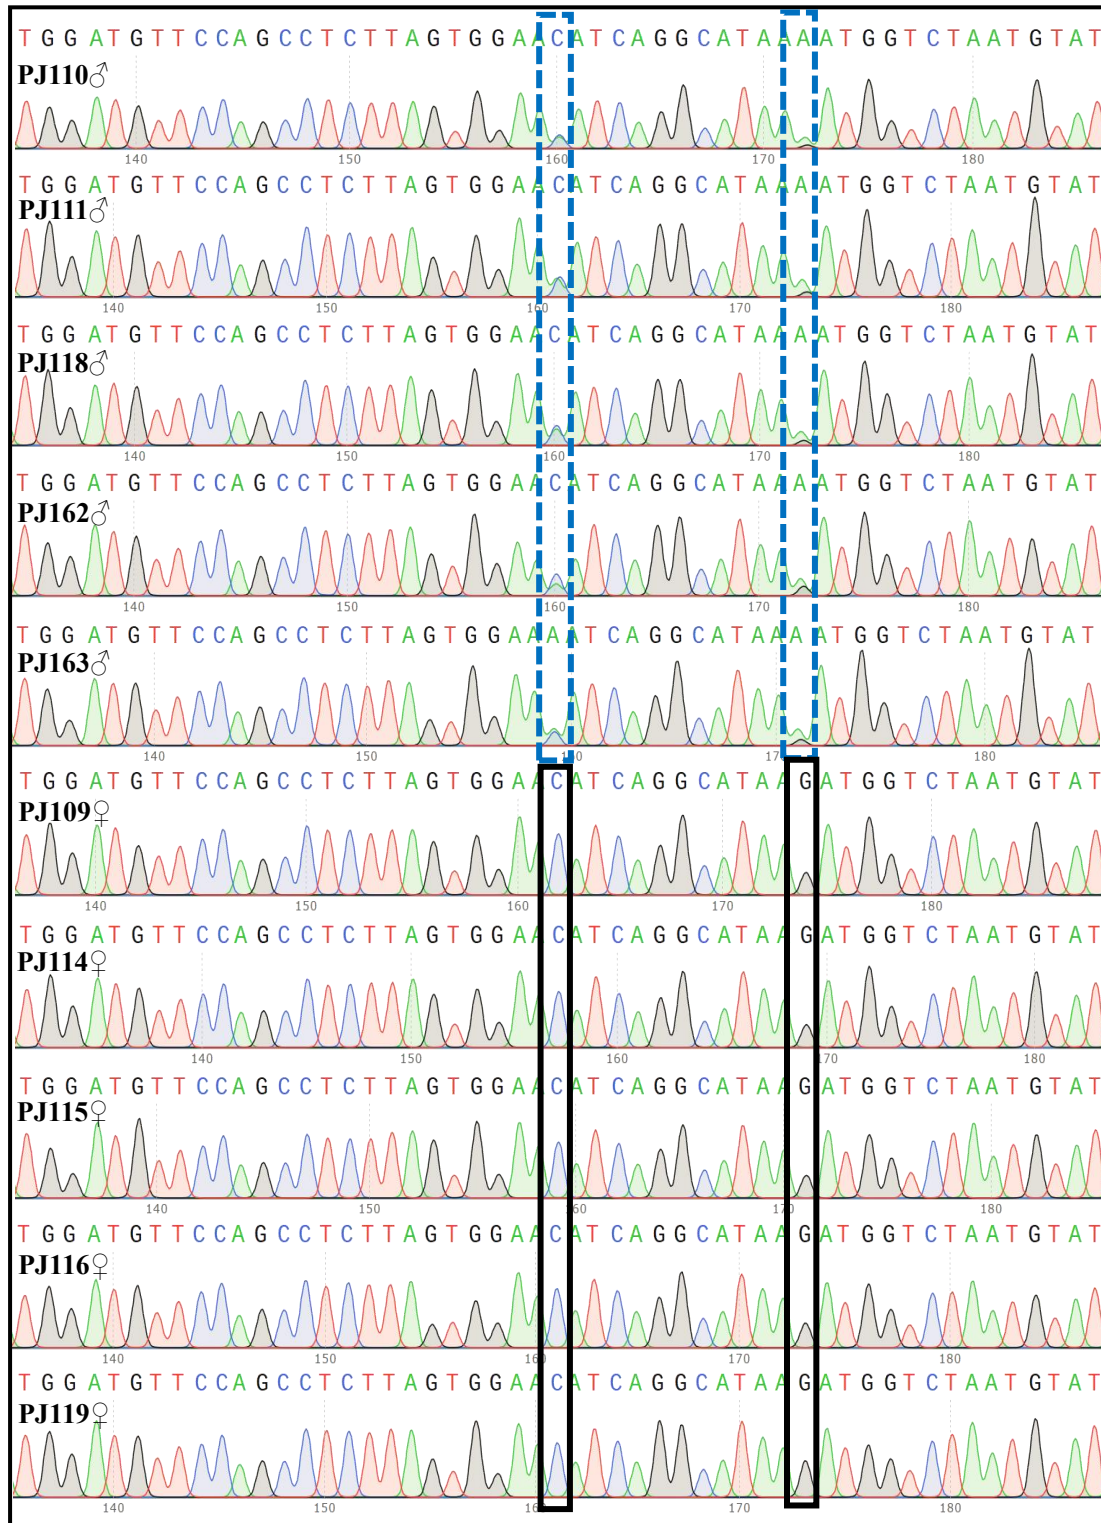

*A. tubero depressus* (Clocus\_1390631)

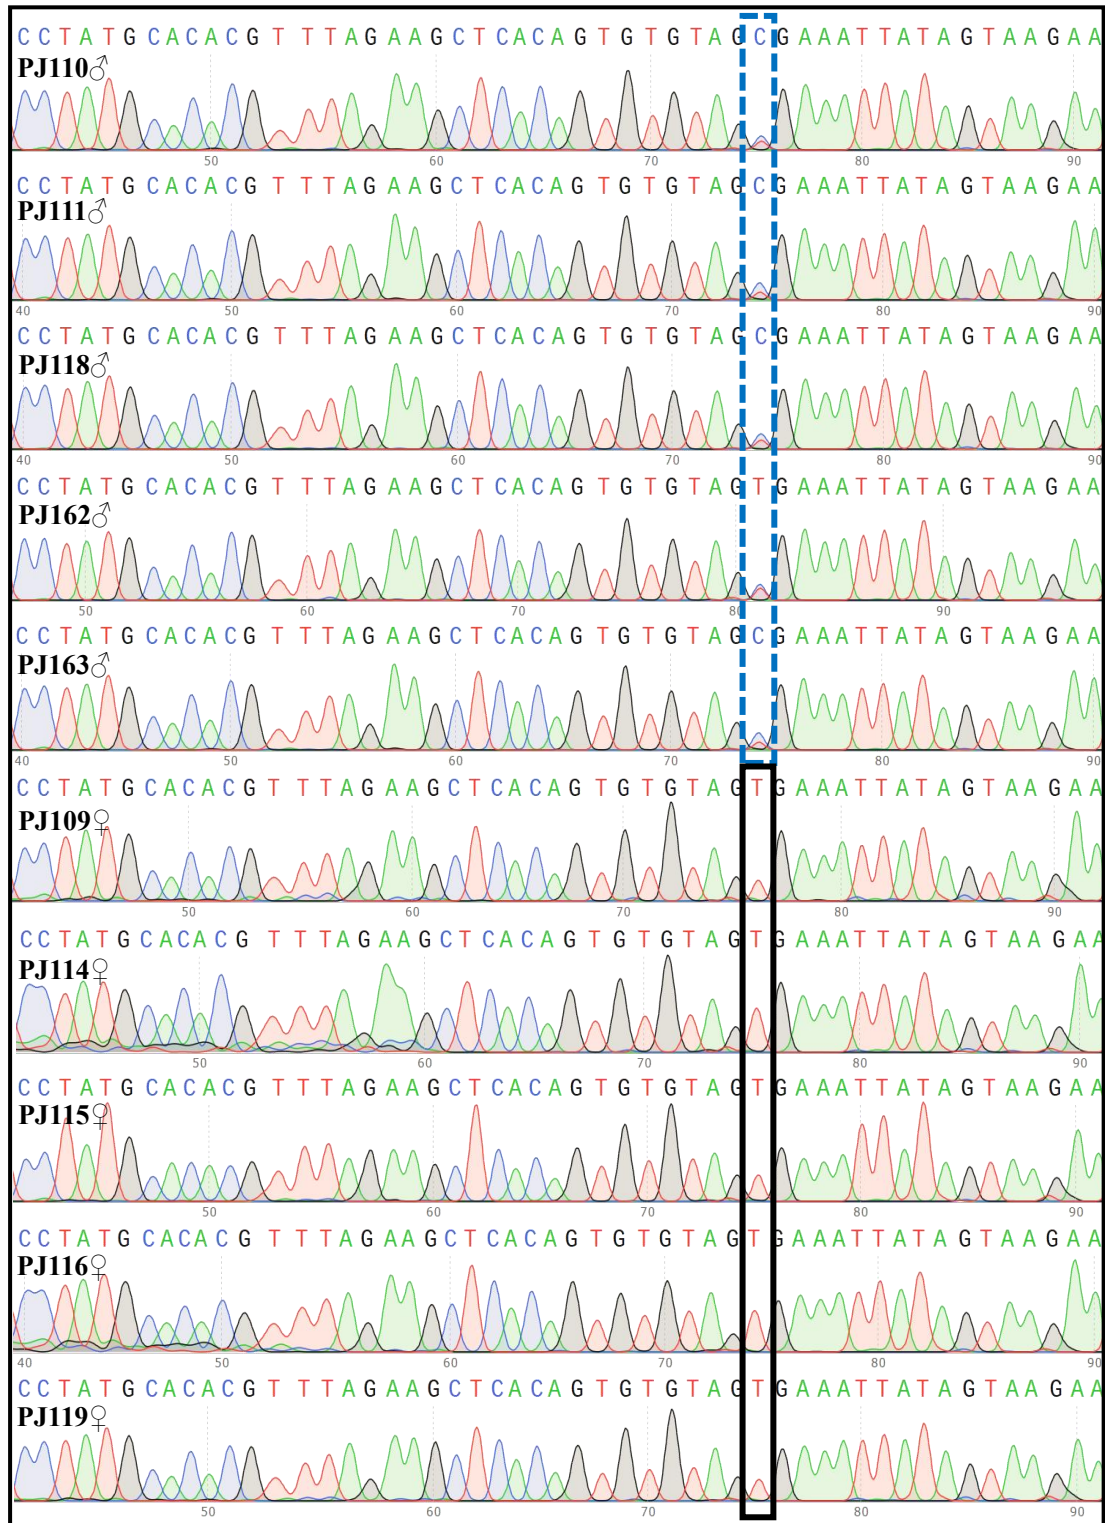

*A. tubero depressus* (Clocus\_1950702)

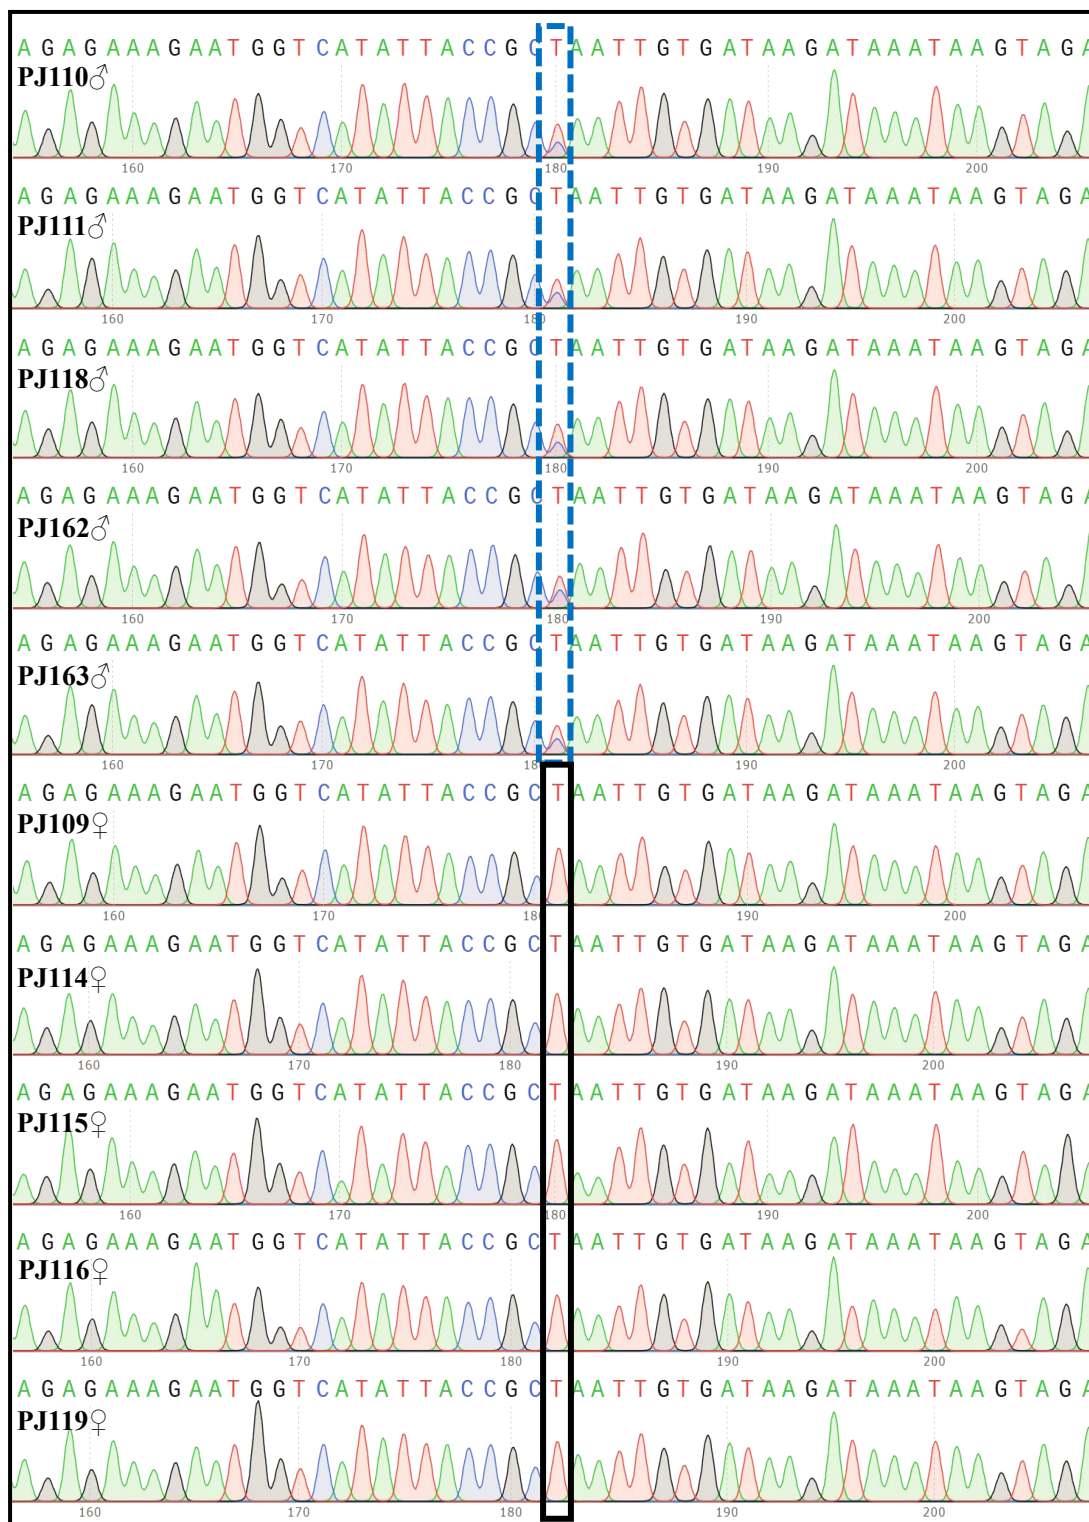



*A. tubero depressus* (Clocus\_2024518)

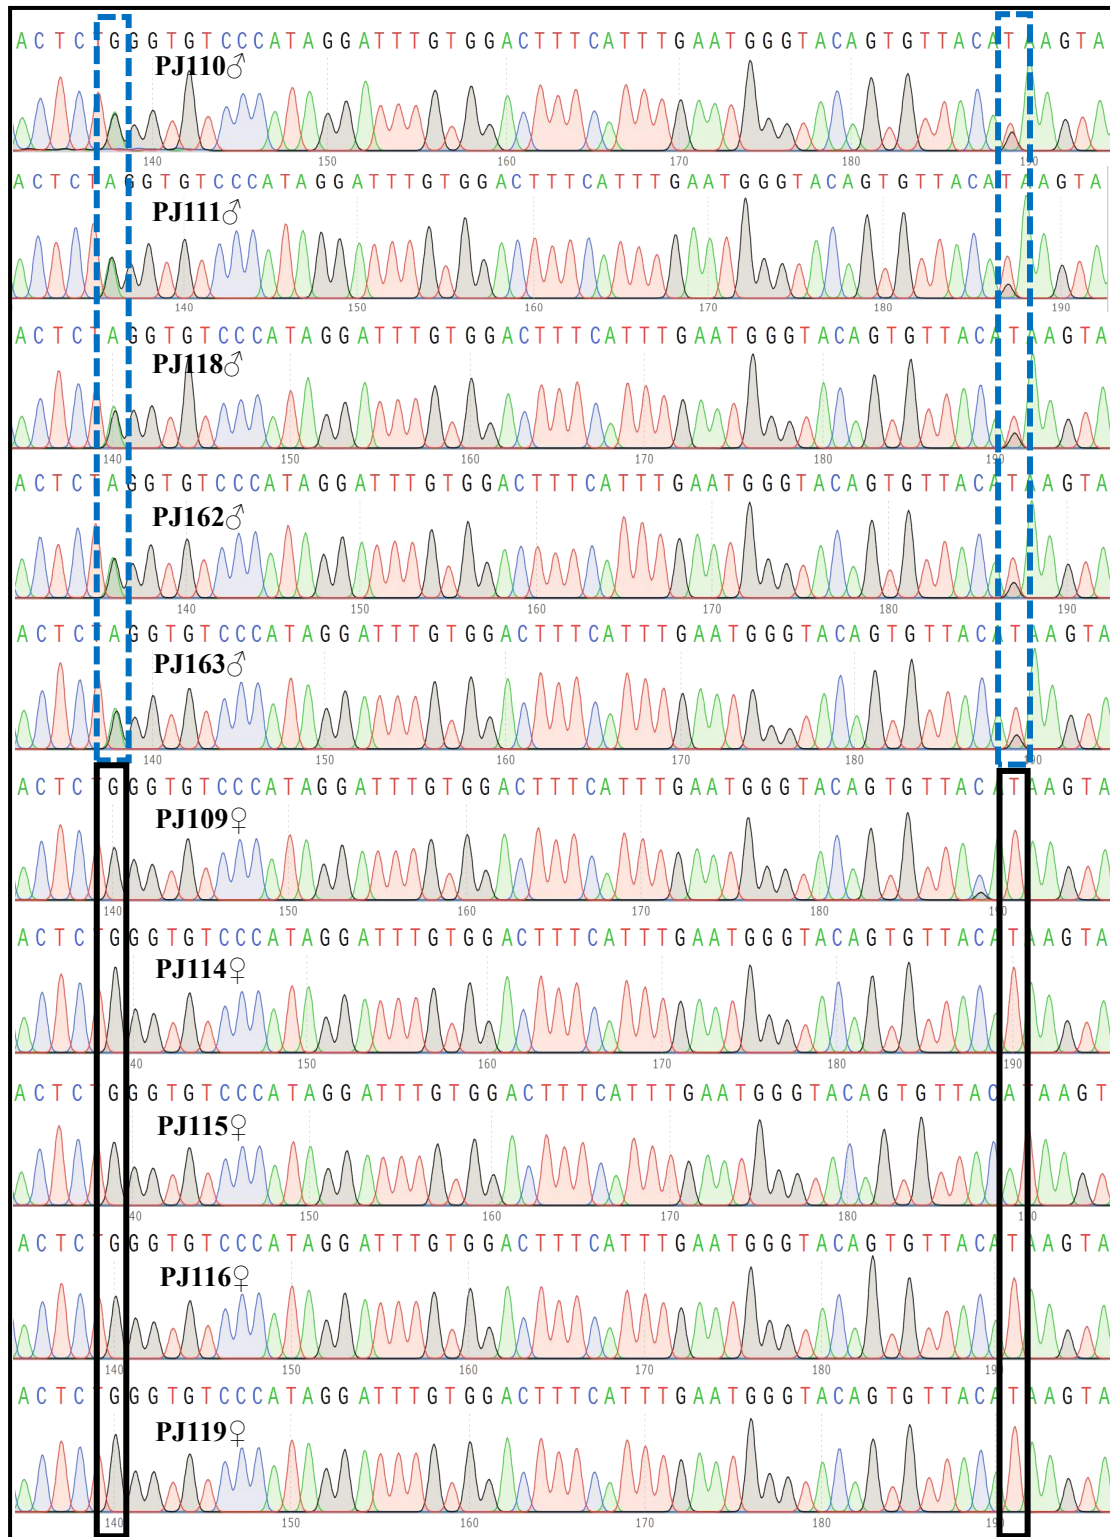



*A. tubero depressus* (Clocus\_2049833)

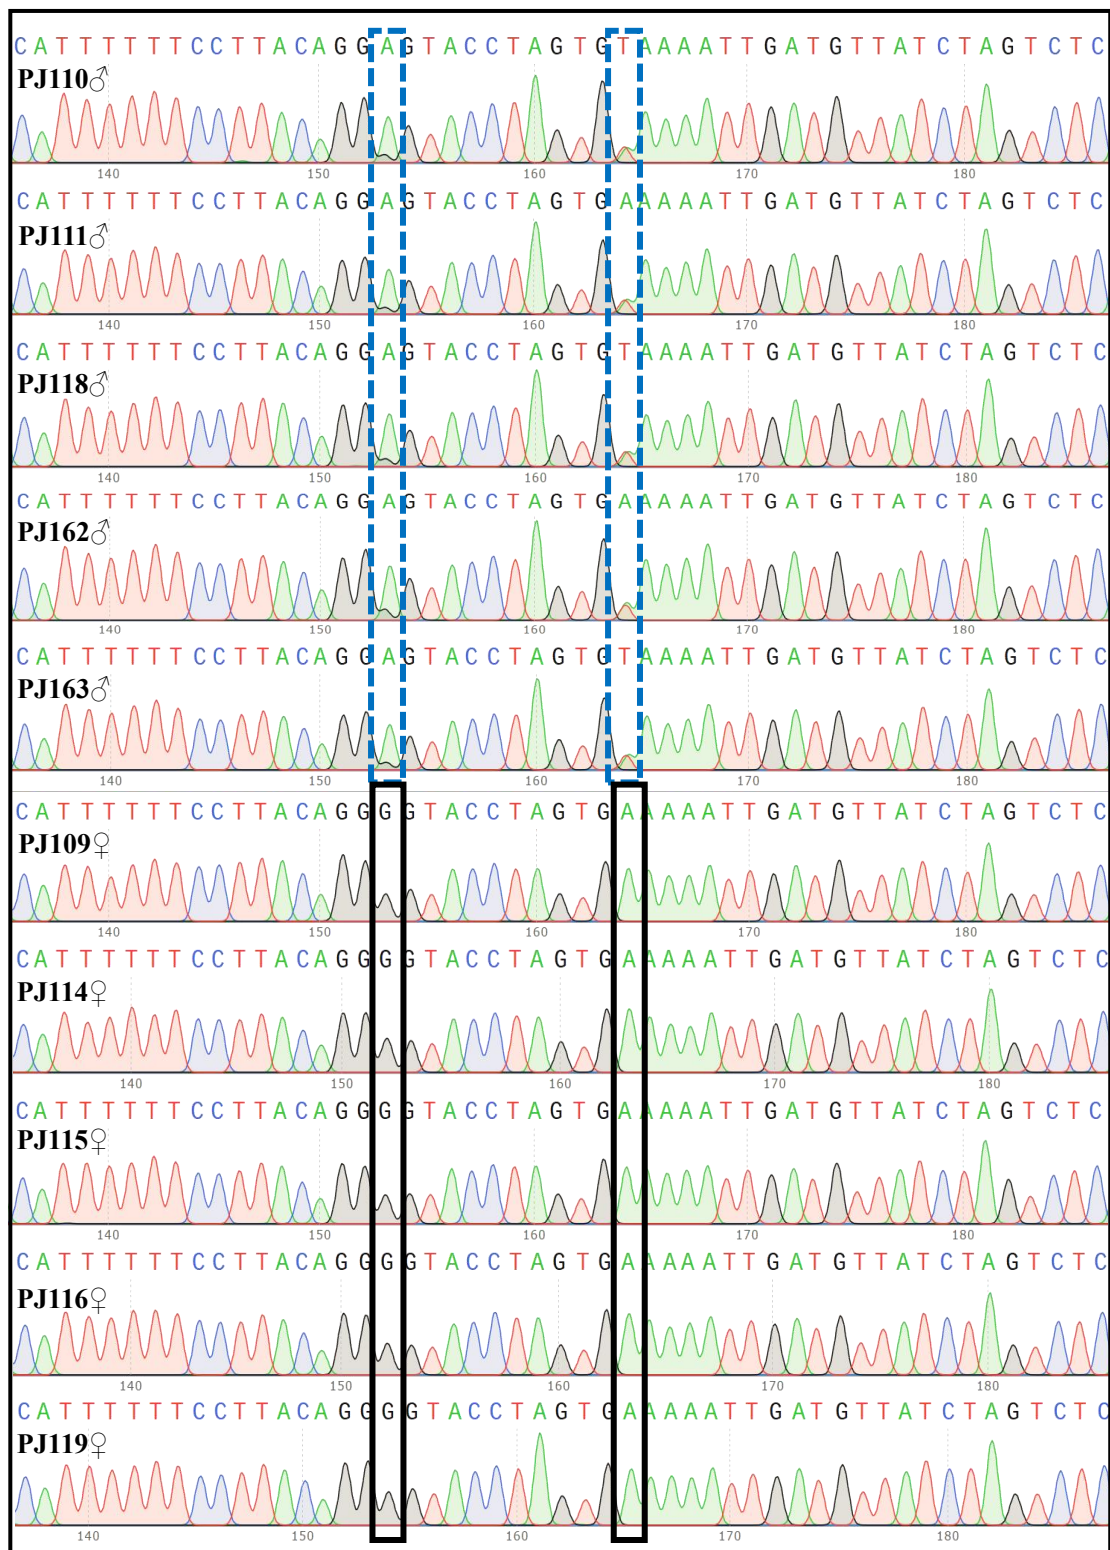

*A. wuyiensis* (Clocus\_117656)

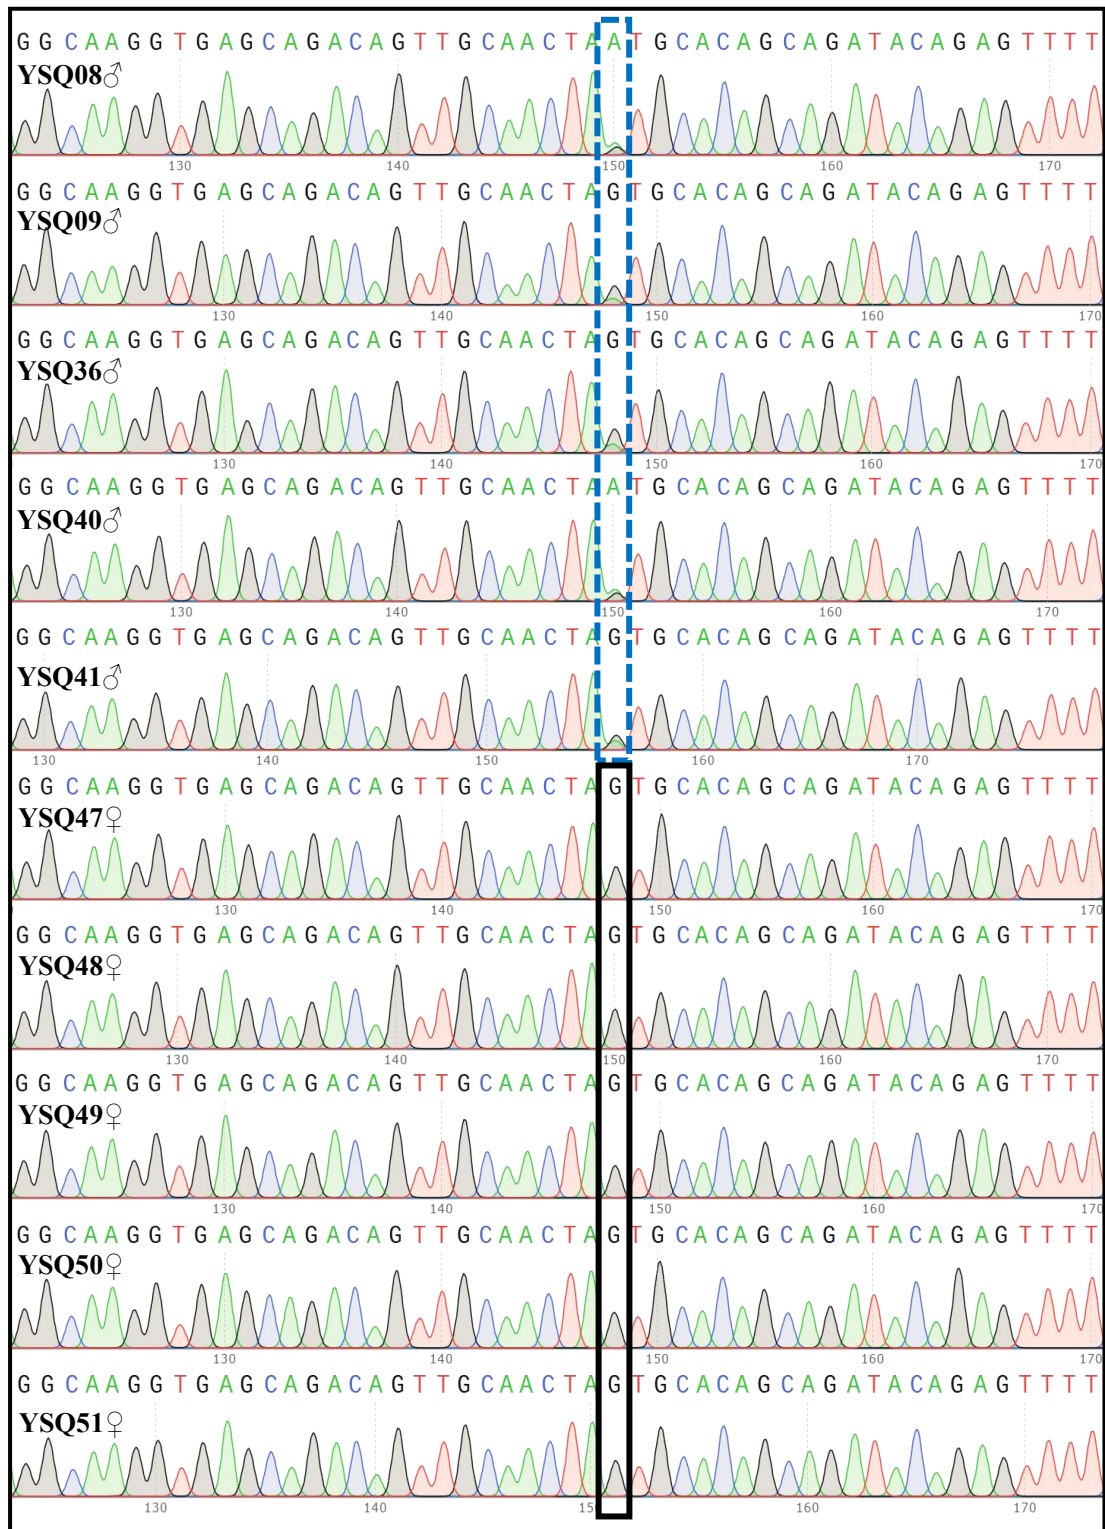

*A. wuyiensis* (Clocus\_120446)

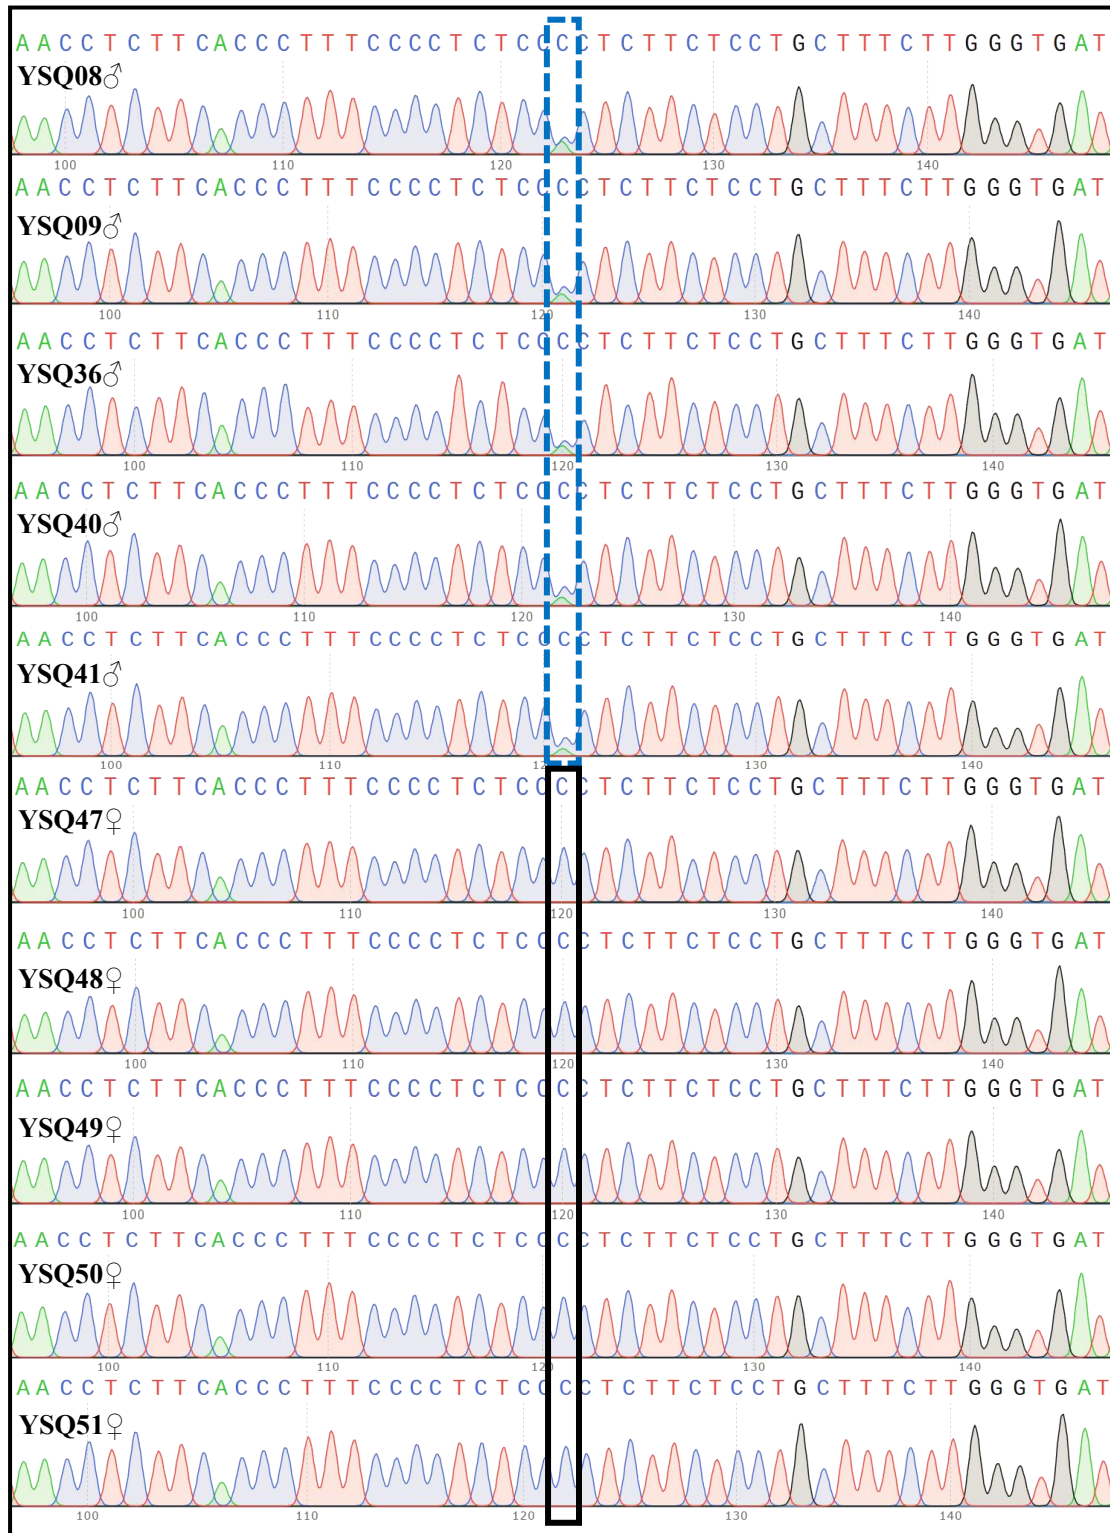



*A. wuyiensis* (Clocus\_177528)

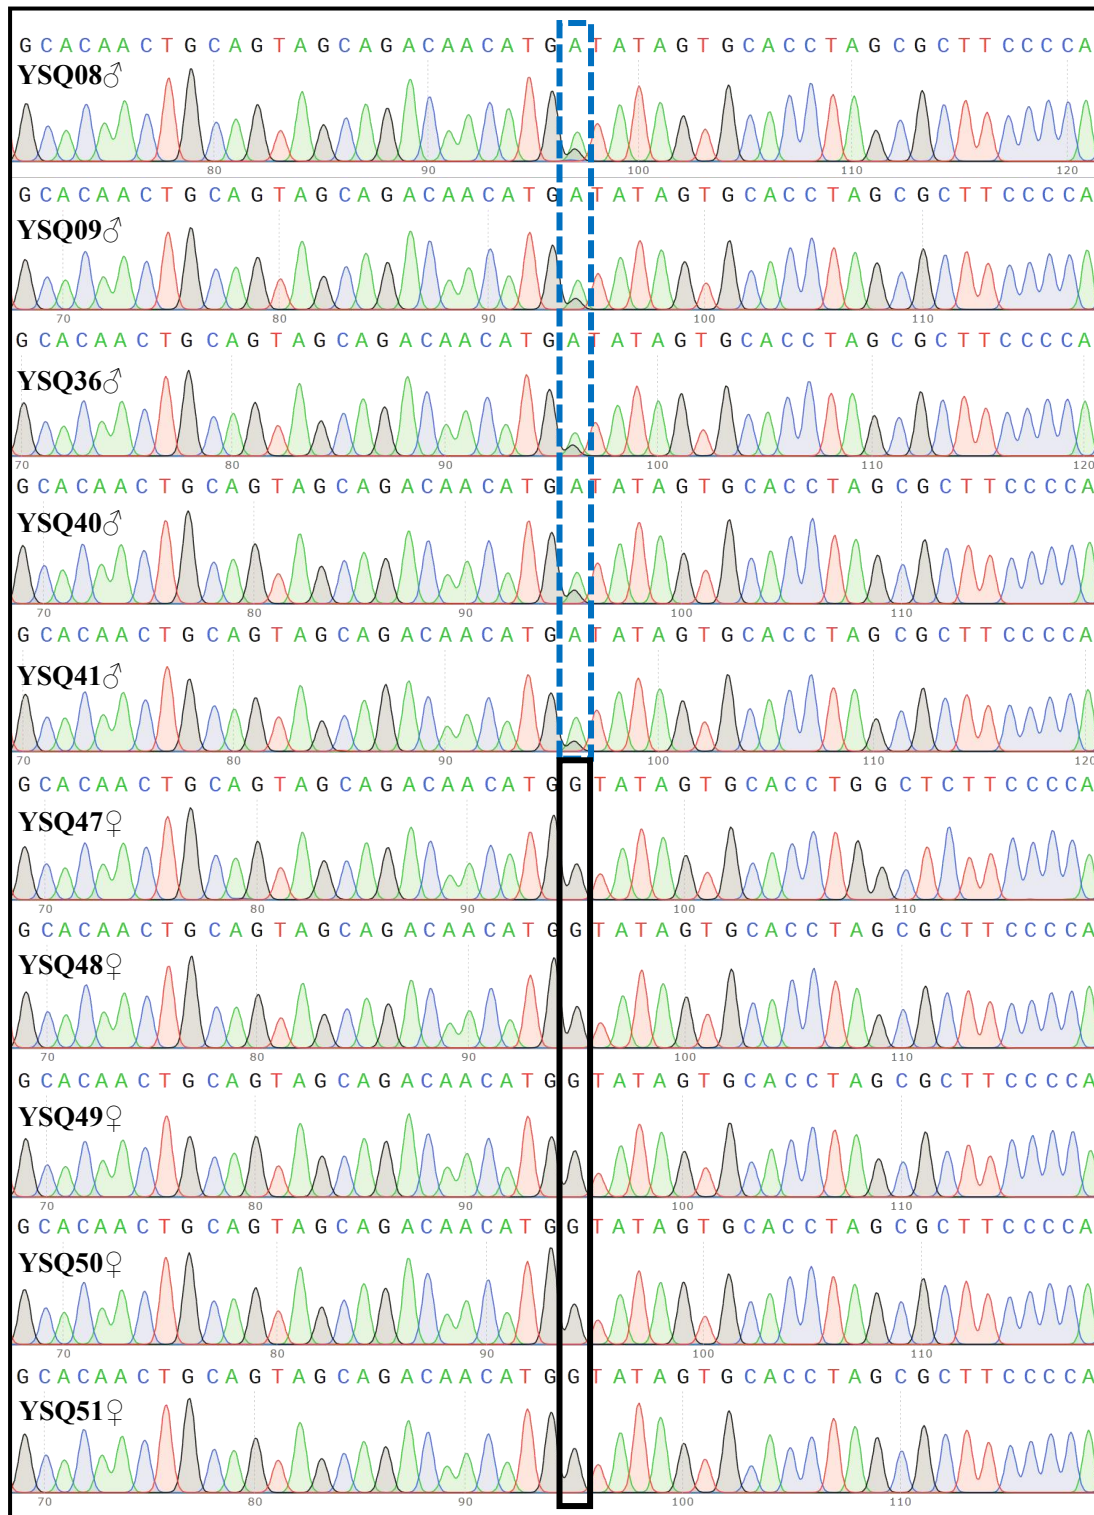

*A. wuyiensis* (Clocus\_321845)

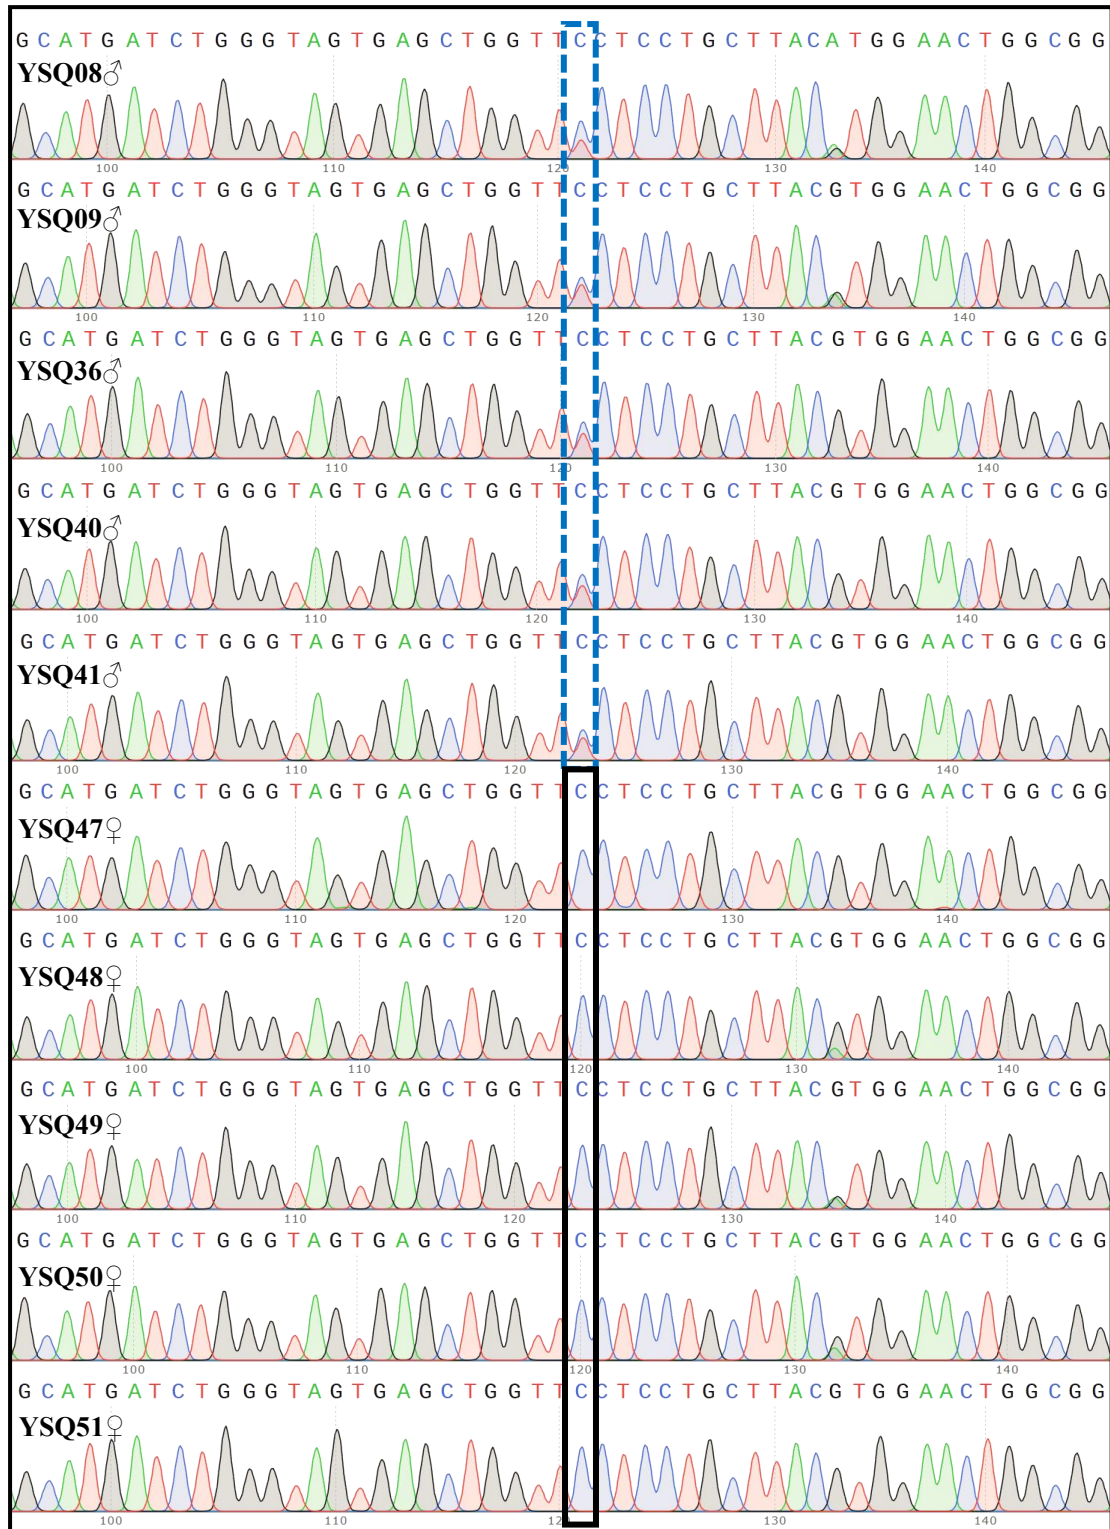

*A. wuyiensis* (Clocus\_375485)

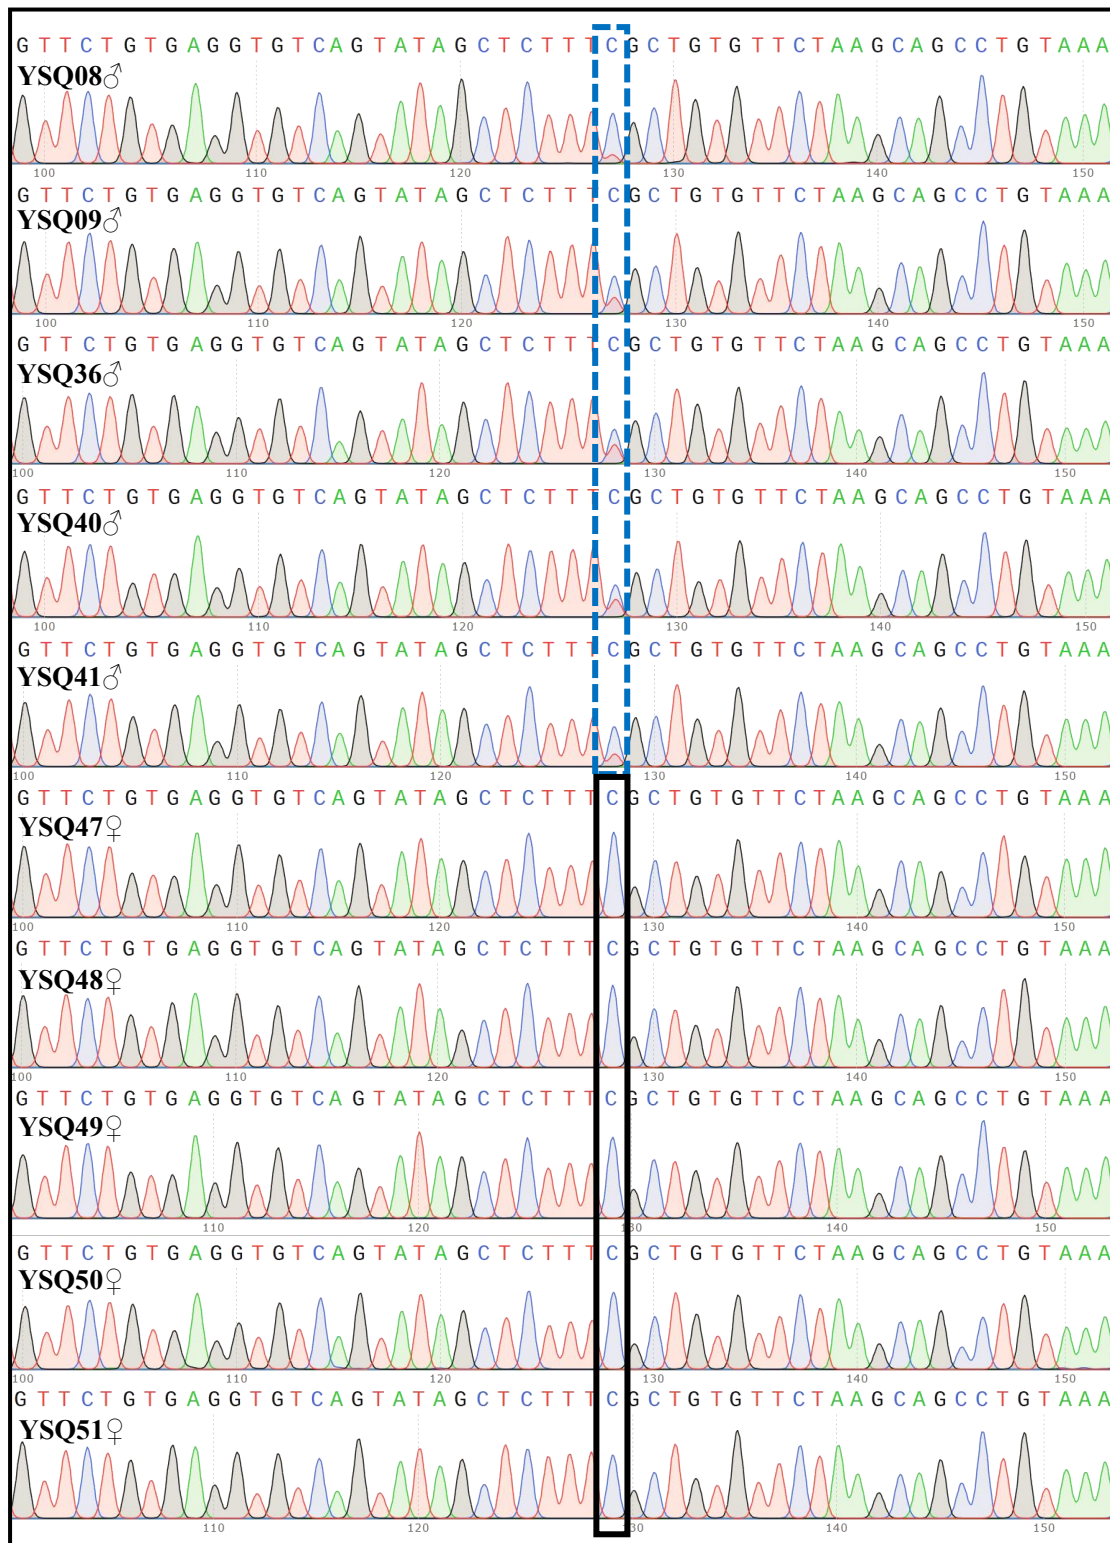



*A. wuyiensis* (Clocus\_450377)

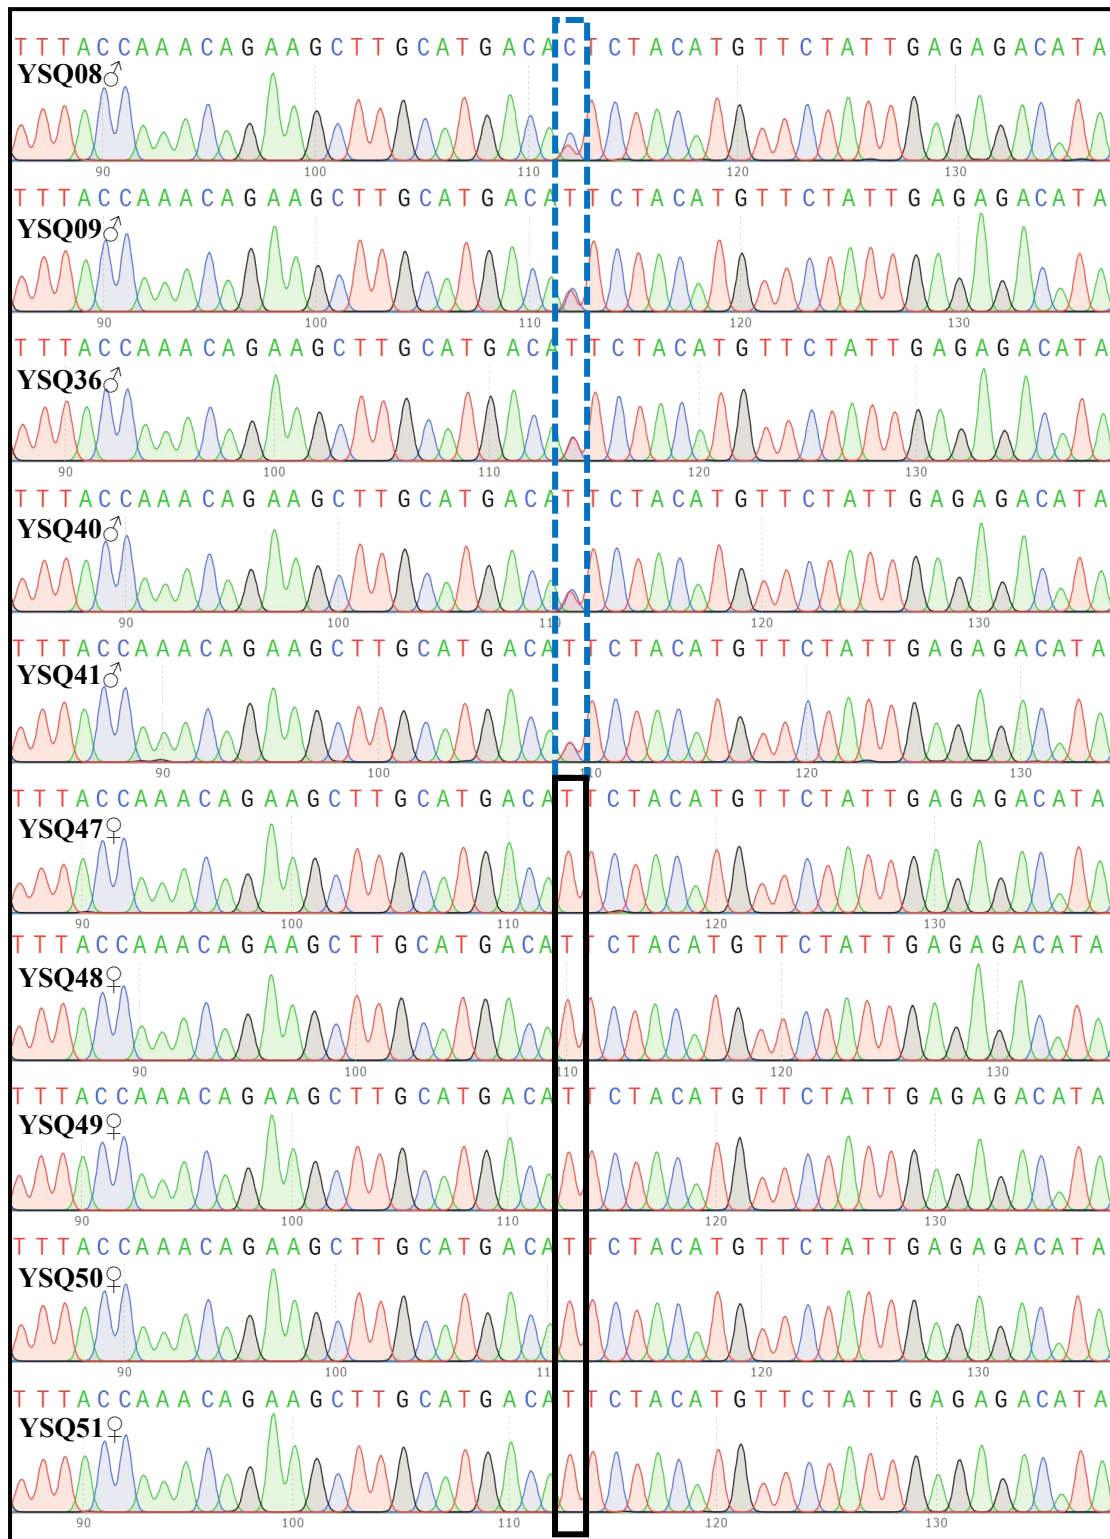

*A. wuyiensis* (Clocus\_1146109)

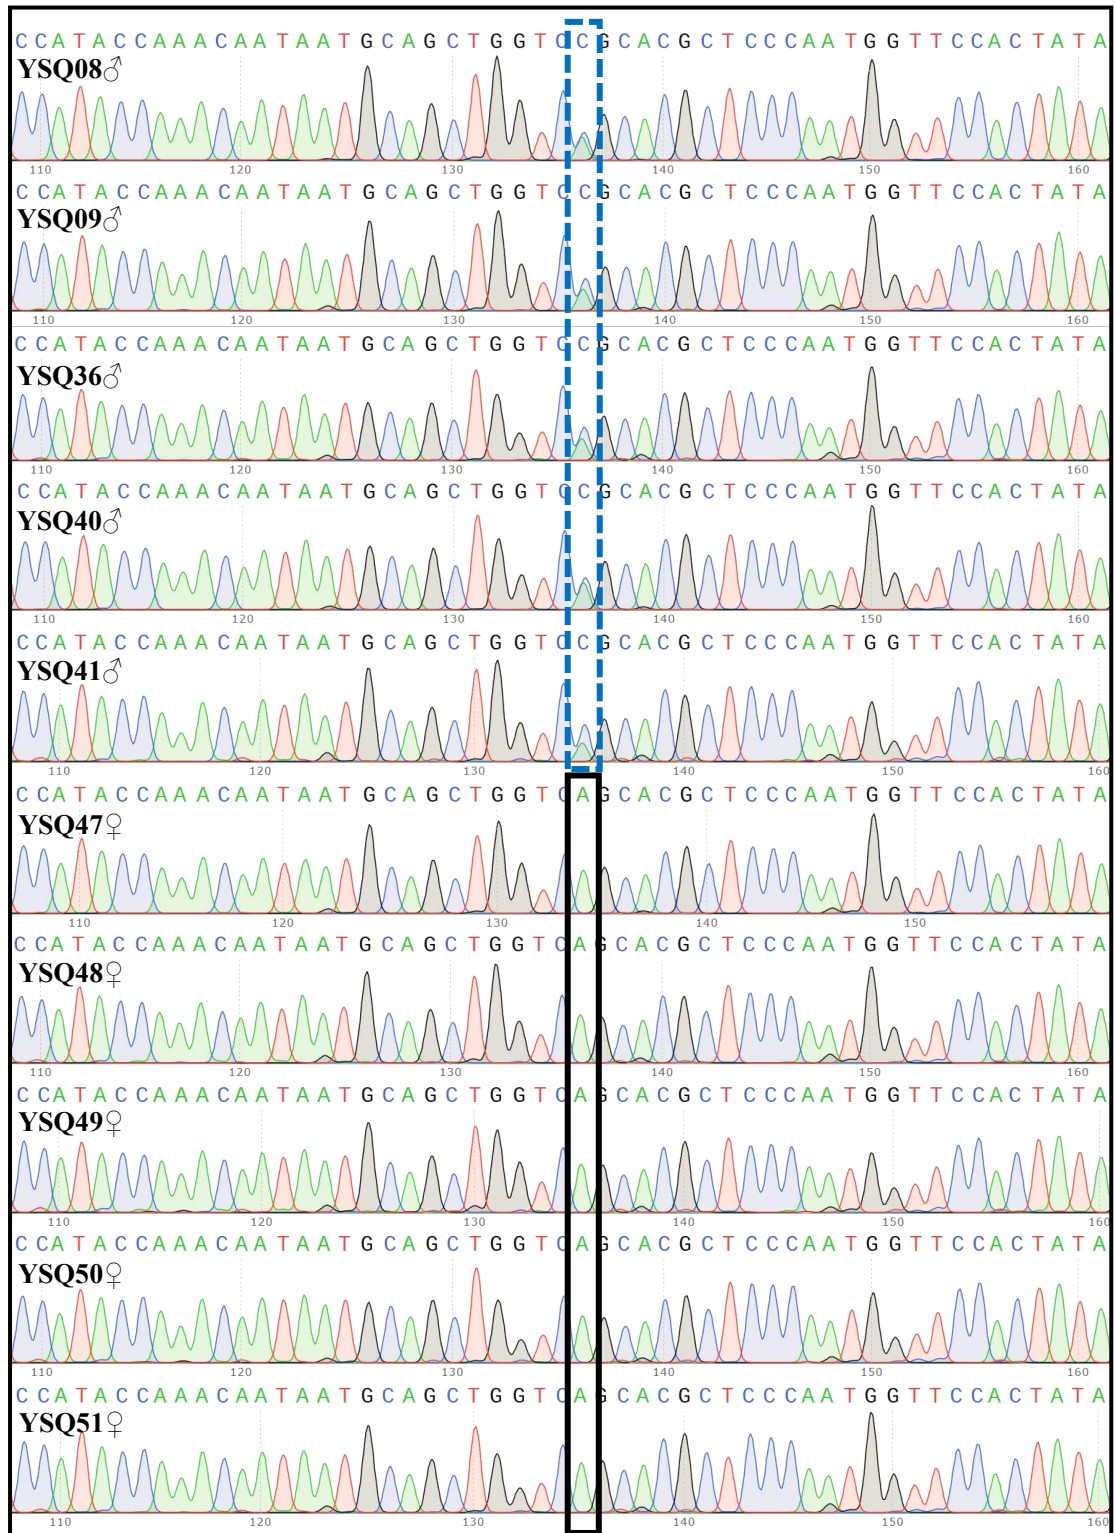

*A. xinduoqiao* (Clocus\_106254)

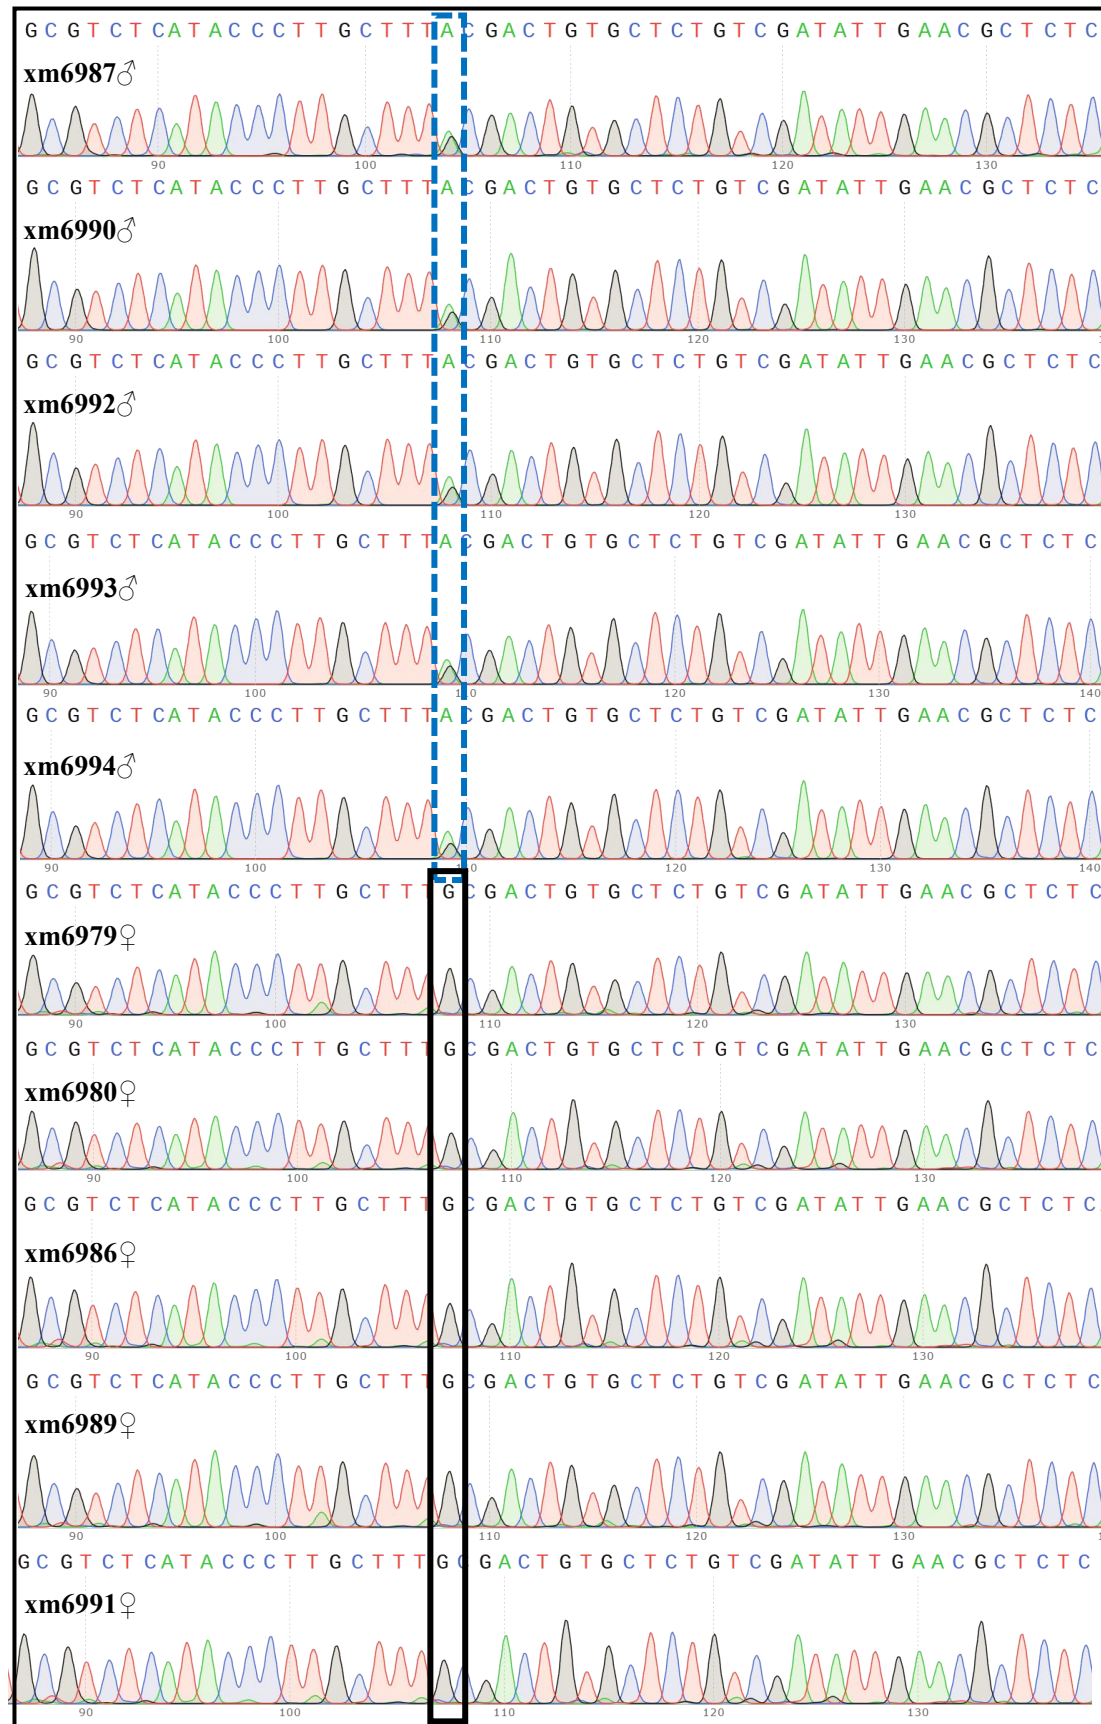



*A. xinduqiao* (Clocus\_746953)

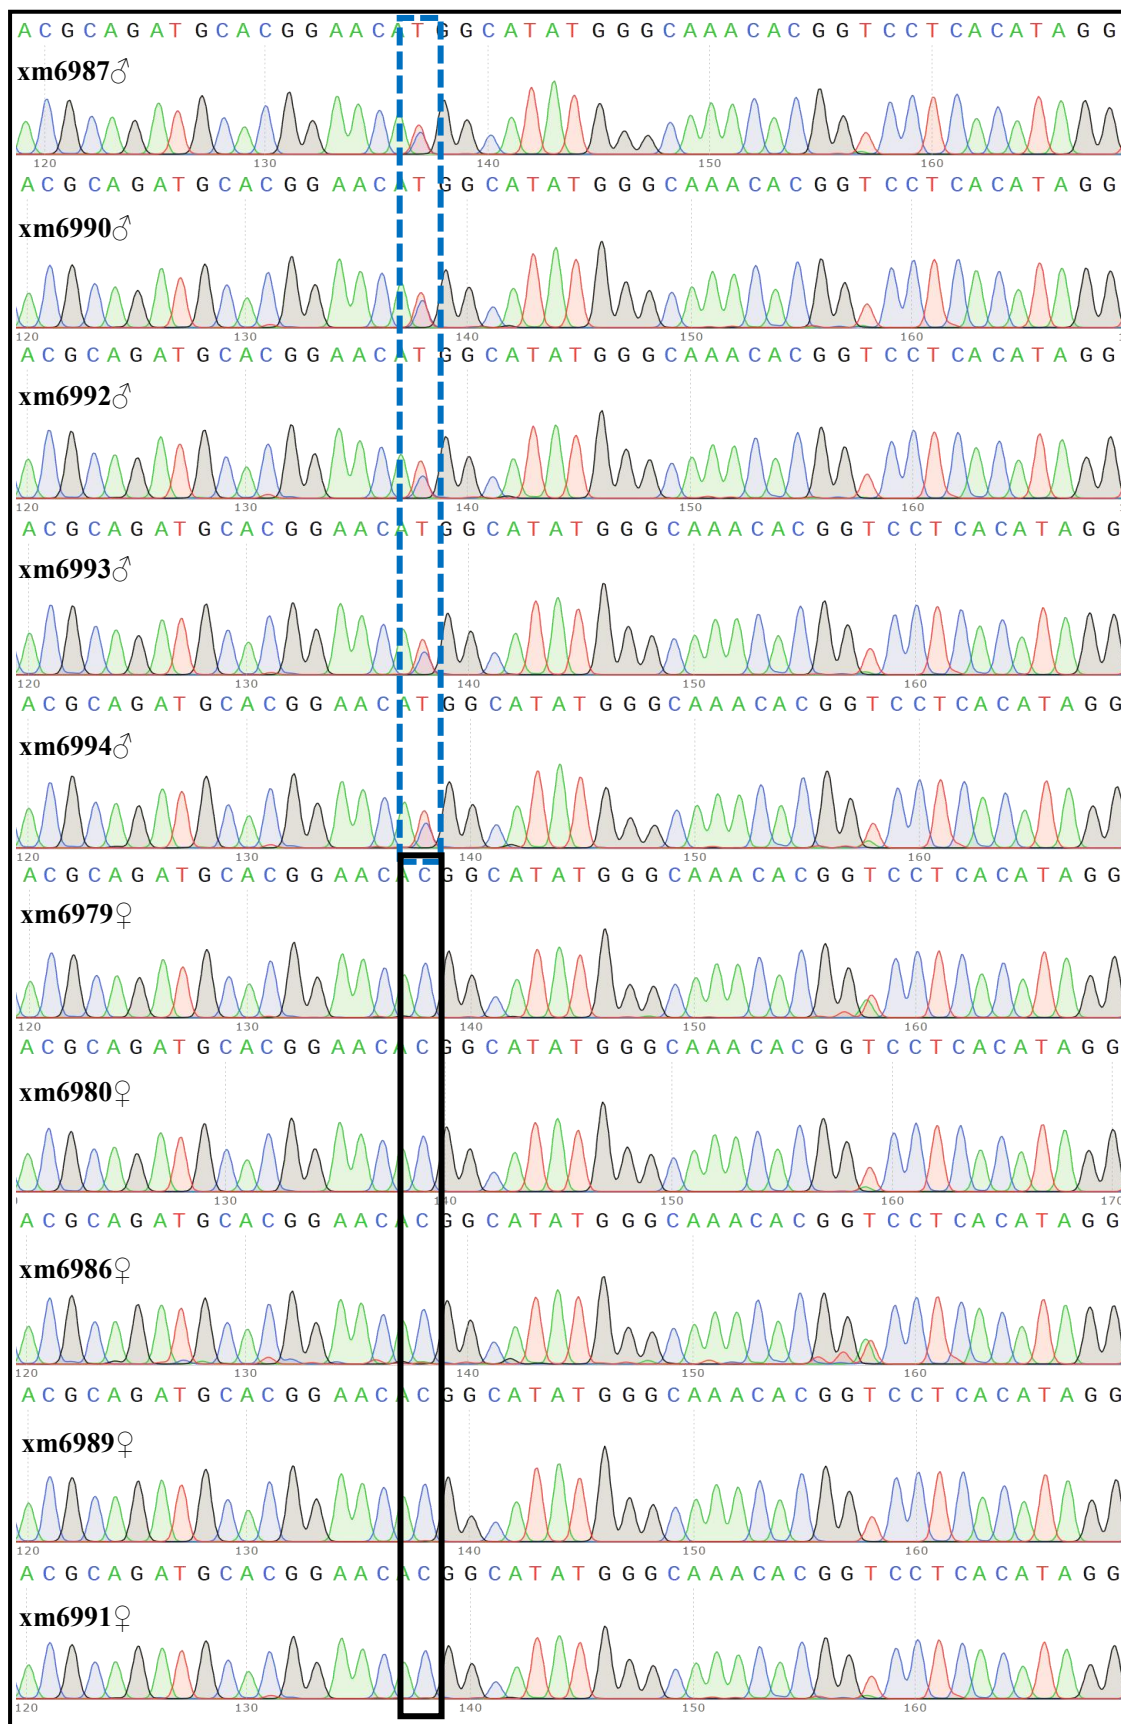

*A. xinduoqiao* (Clocus\_1266715)

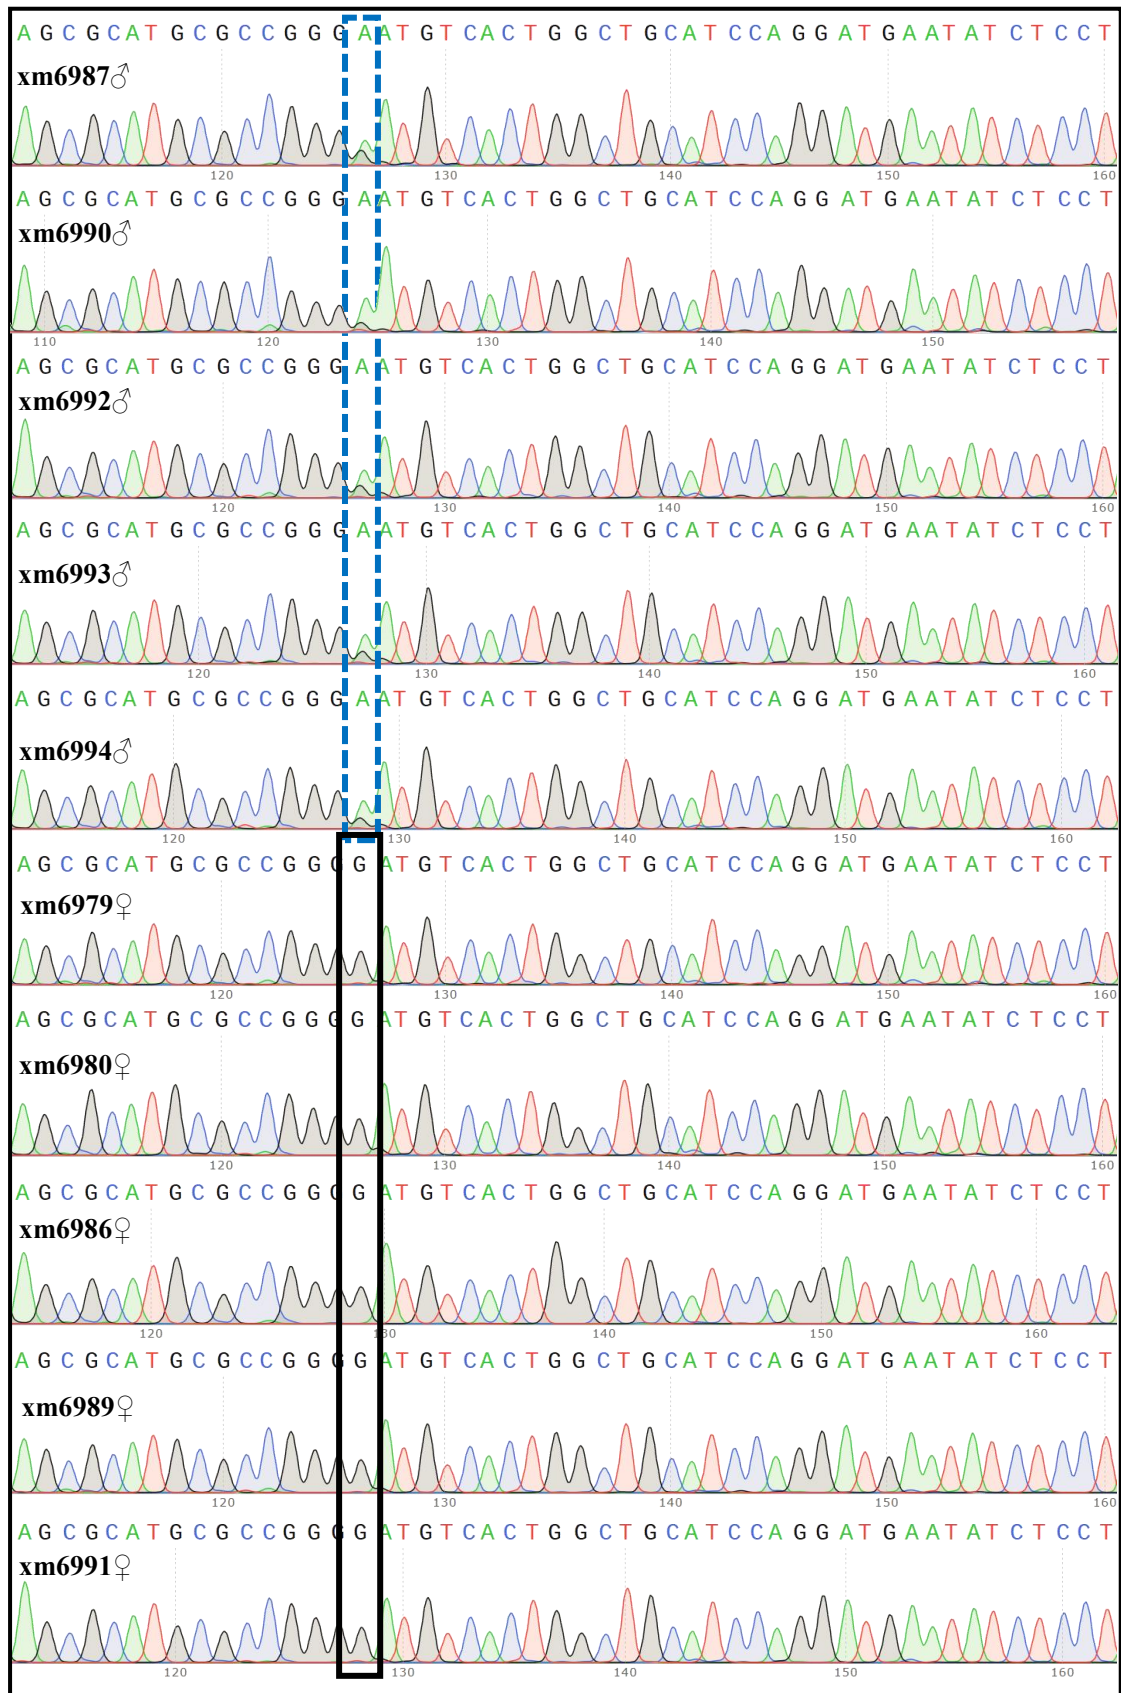

Supplement: s1 [file s1]
