# Supplementary material for: Heterogeneous Evolution of Sex Chromosomes in the Torrent Frog Genus Amolops
Source: MDPI journal article supplement (doi:10.3390/ijms231911146), 2022-09-22

## File S2

The results from *Process\_radtags* of *Amolops* (*A. chunganensis*, *A. jinjiangensis*, *A. lifanensis*, *A. loloensis*, *A. mantzorum*, *A. sp.*, *A. tuberodepressus*, *A. wuyiensis*, *A. xinduqiao*). Abscissa represents the number of reads, and ordinate is the sample name of the individual. Male individuals are represented by the symbol “M” and female individuals by the symbol “F”.

### *A. chunganensis* (GBS data)

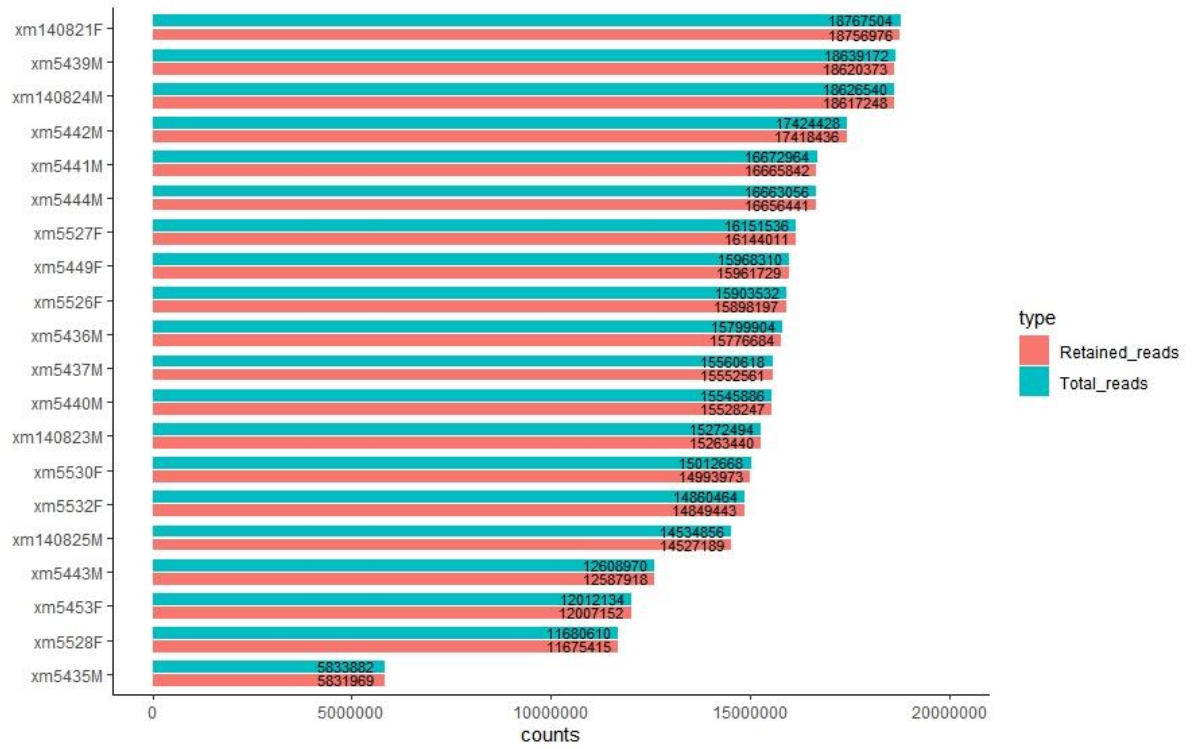

### *A. jinjiangensis* (GBS data)

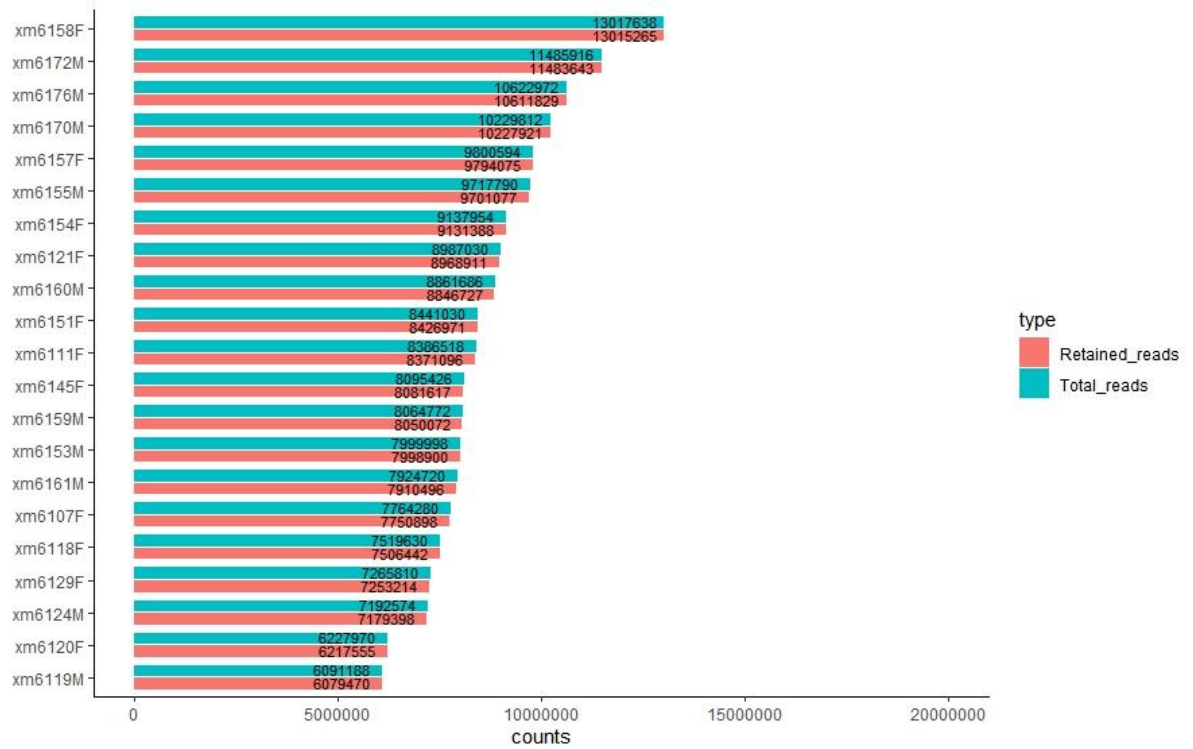

### *A. jinjiangensis* (RAD-seq data)

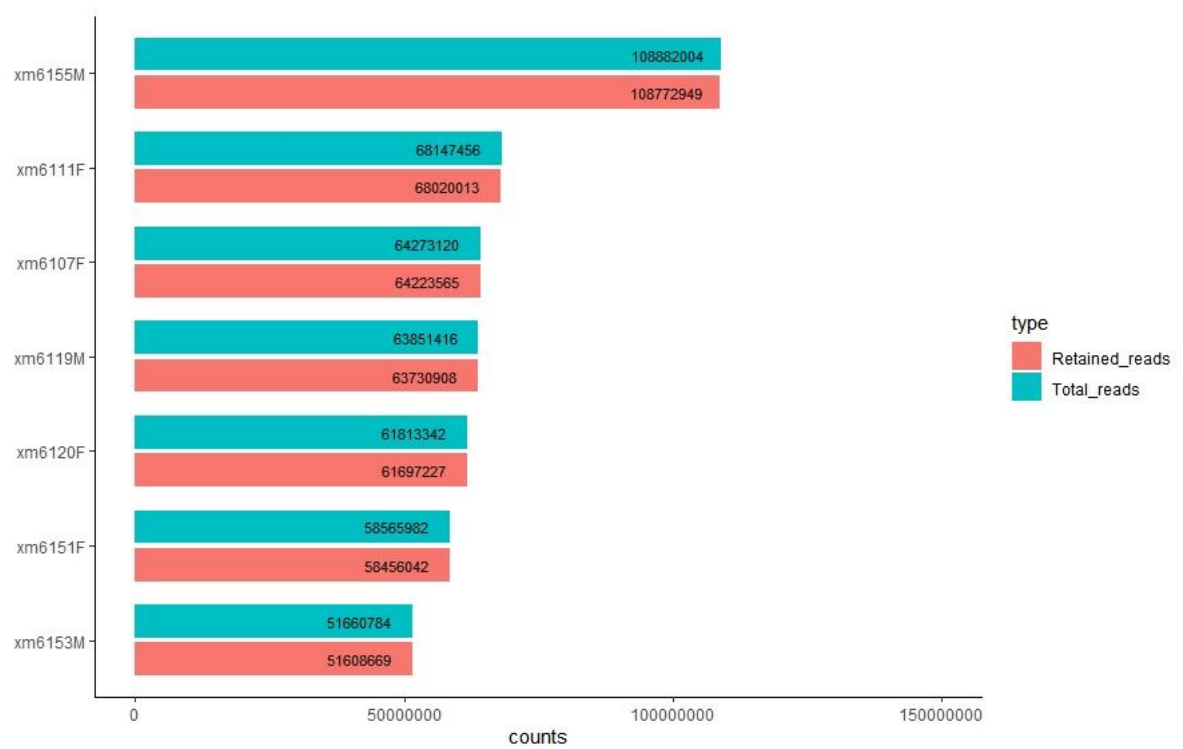

### *A. lifanensis* (GBS data)

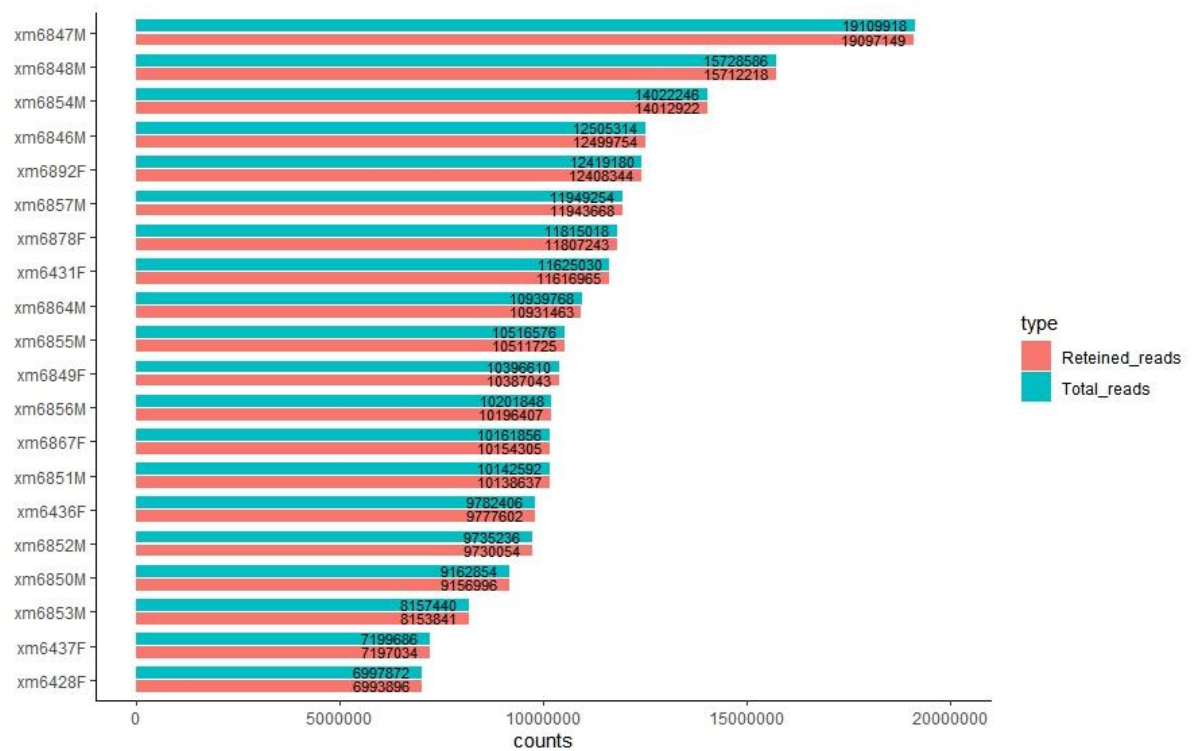

### *A. loloensis* (GBS data)

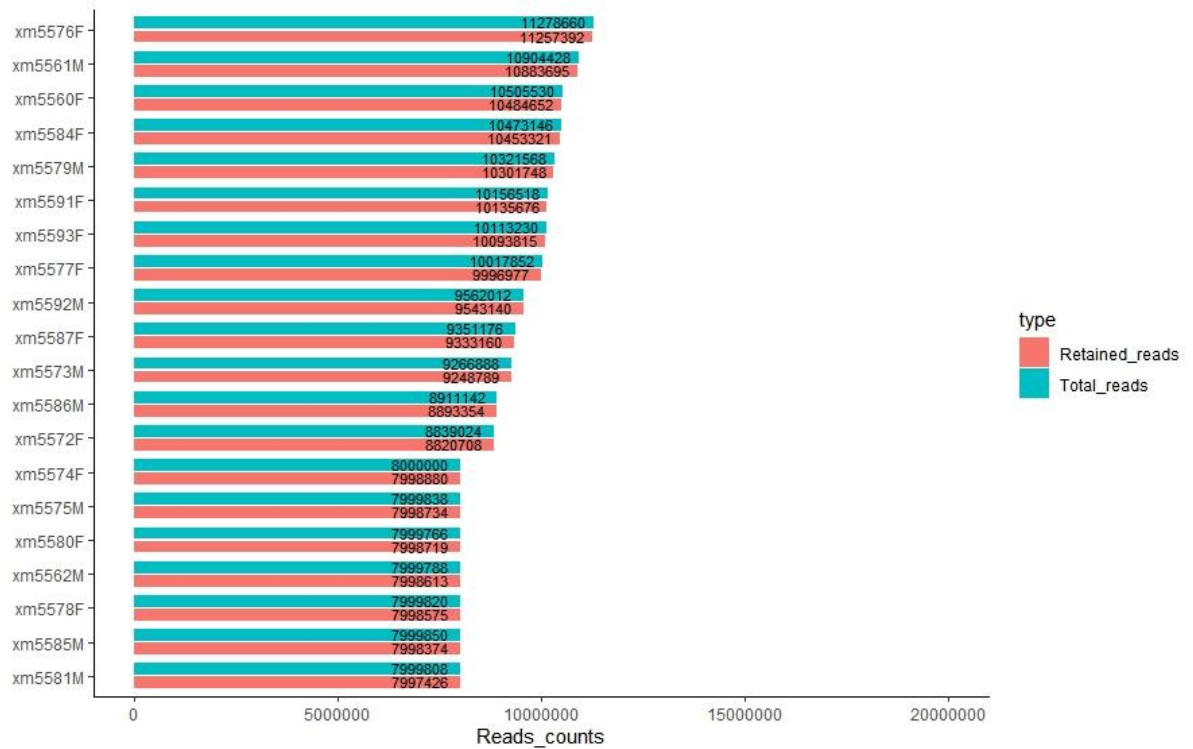

### *A. mantzorum* (GBS data)

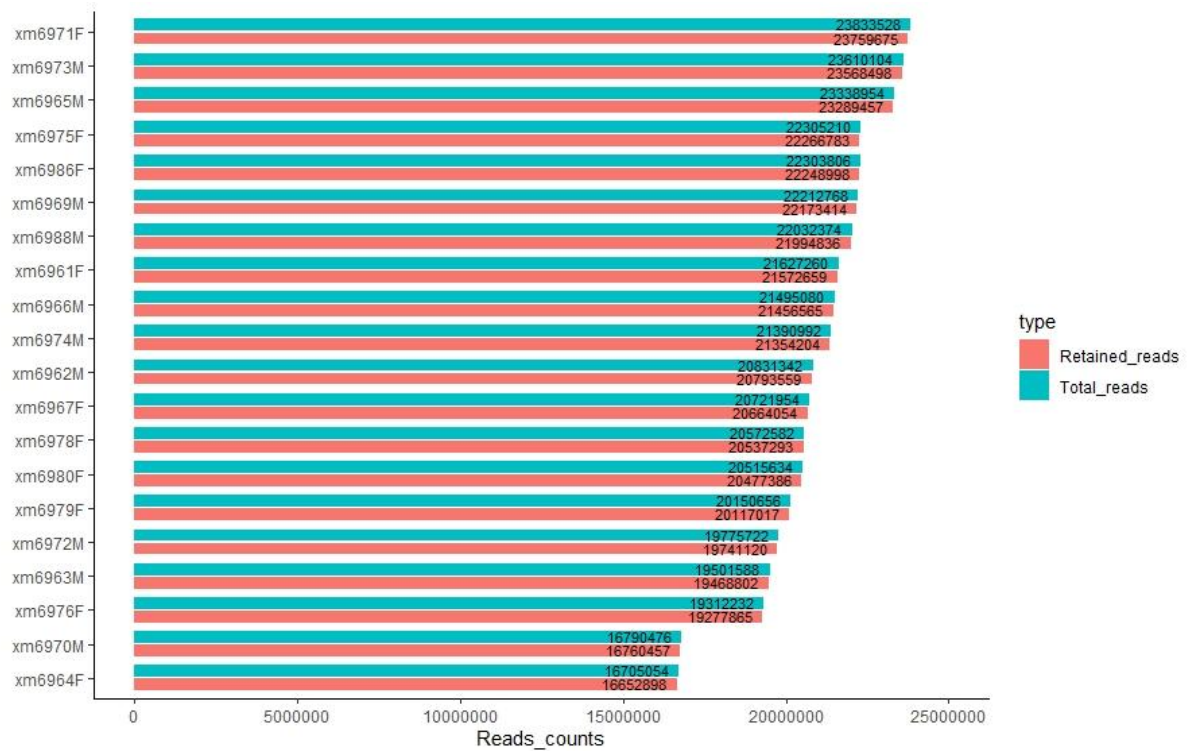

## A. sp. (GBS data)

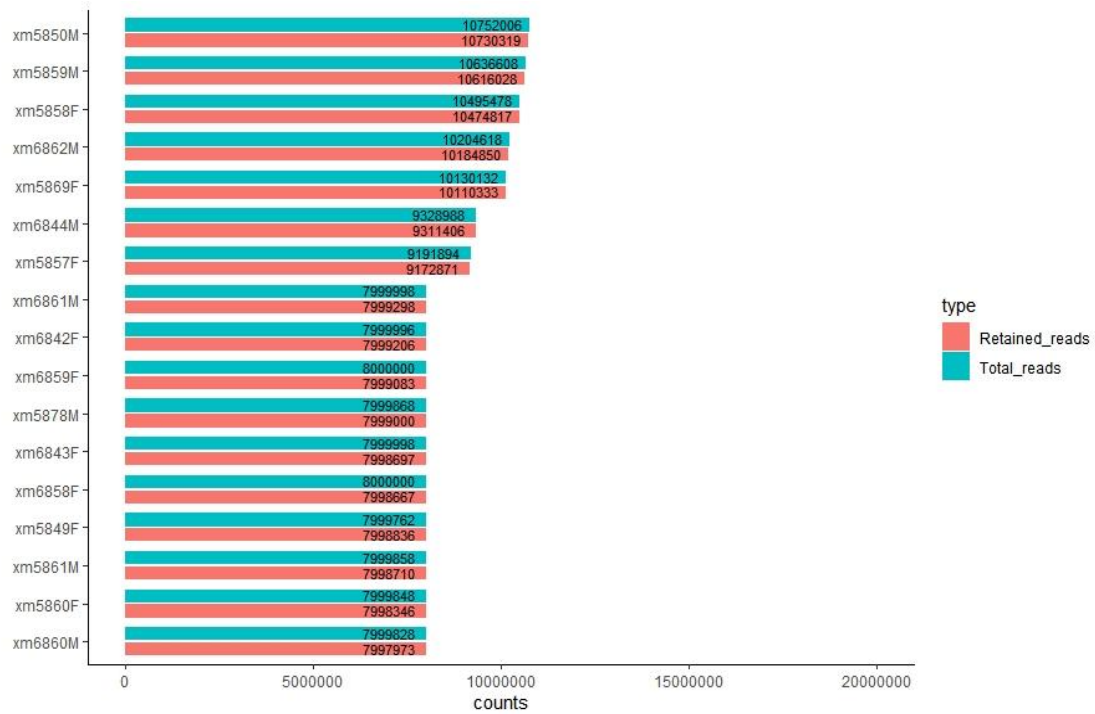

## A. sp. (RAD-seq data)

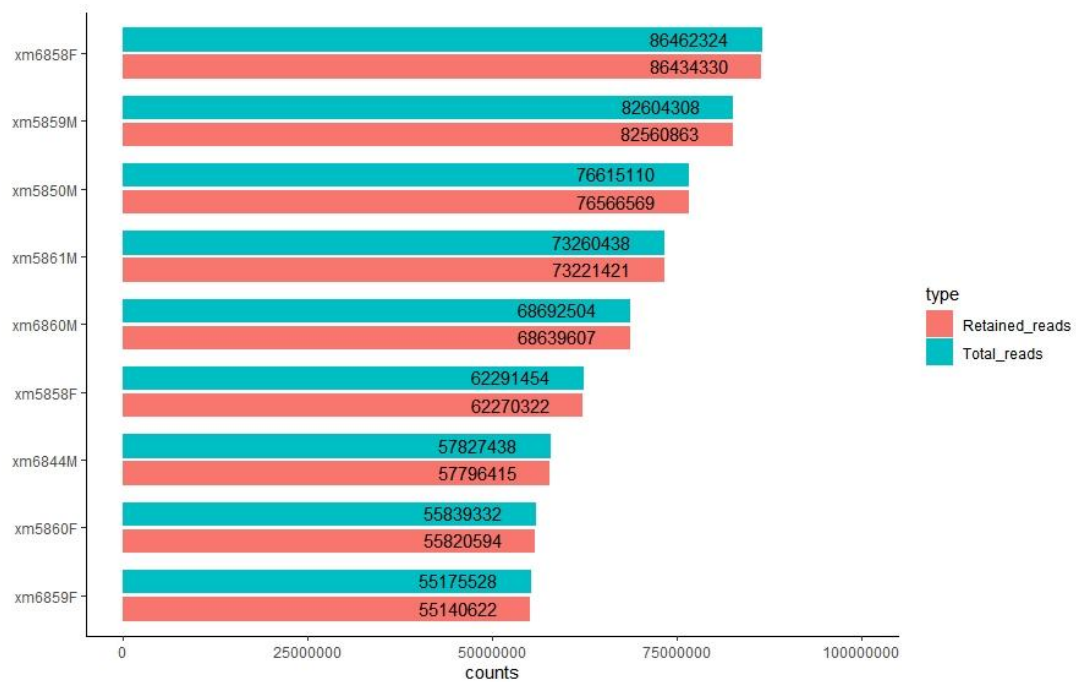

### *A. tuberodepressus* (GBS data)

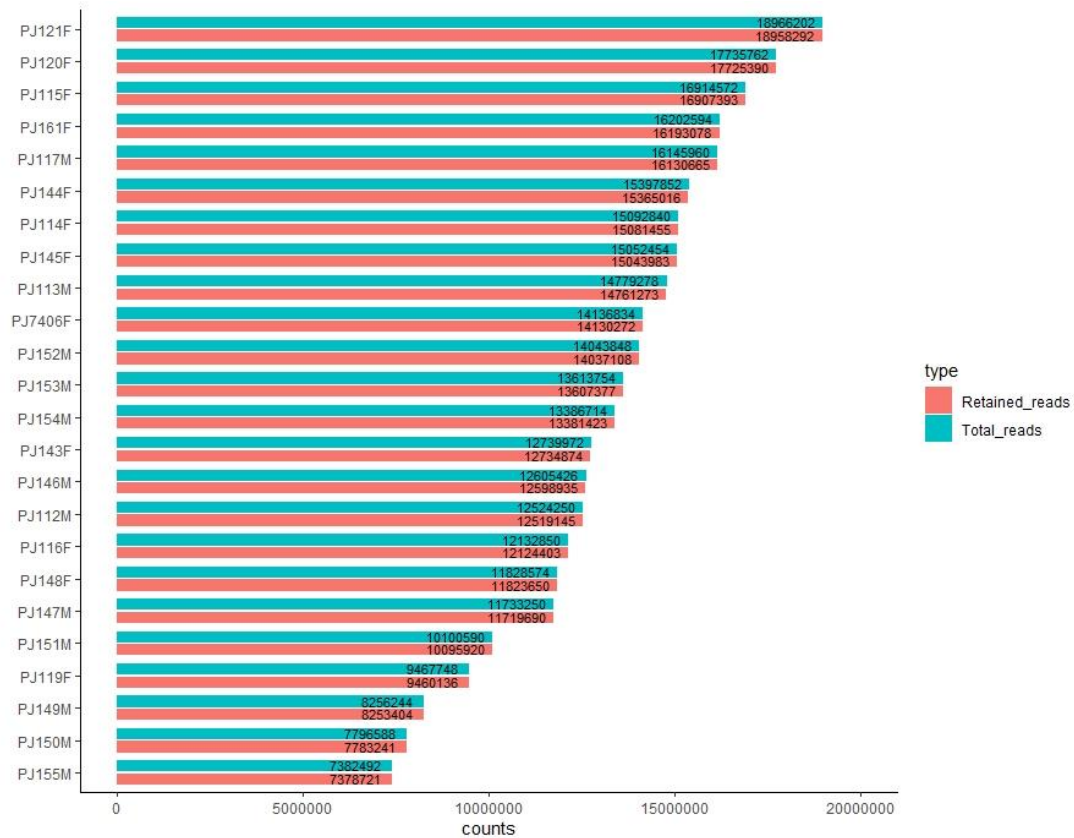

### *A. wuyiensis* (GBS data)

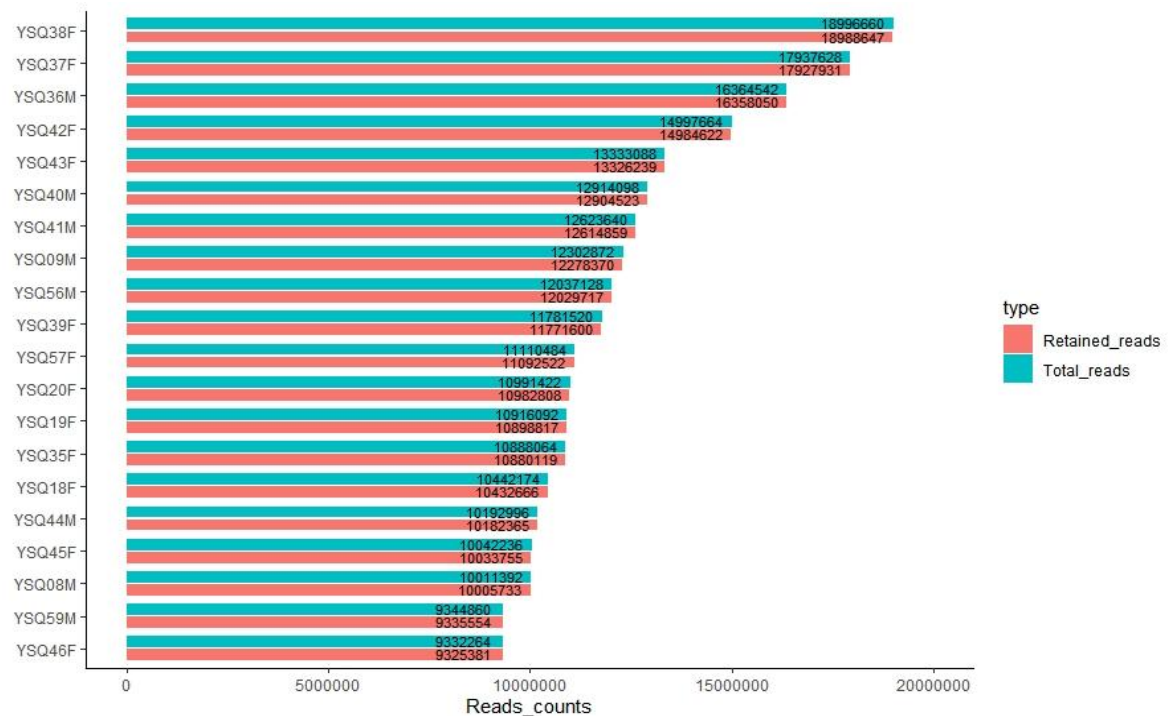

# *A. xinduoqiao* (GBS data)

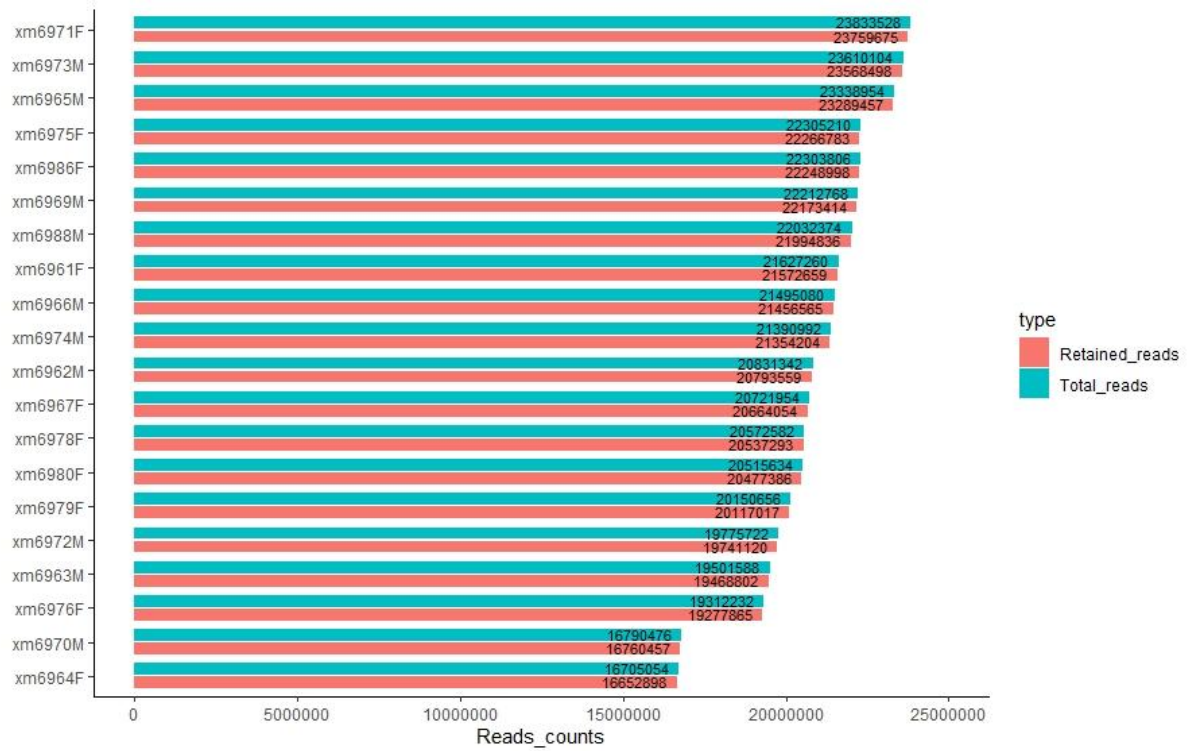

Supplement: s1 [file s1]
