# Supplementary material for: Heterogeneous Evolution of Sex Chromosomes in the Torrent Frog Genus Amolops
Source: MDPI journal article supplement (doi:10.3390/ijms231911146), 2022-09-22
Supplement: s1 [file s1]

**Table S7. Matching nucleotide alignment of the blast hit results of sex-linked loci from the NCBI database.**

| Species                   | Locus    | Length<br>(bp) | NCBI Hit                                                                                                              | Query<br>Cover | E-value | identity | start | end   |
|---------------------------|----------|----------------|-----------------------------------------------------------------------------------------------------------------------|----------------|---------|----------|-------|-------|
| <i>A. jinjiangensis</i>   | 1320445  | 320            |                                                                                                                       | 38%            | 1e-19   | 83%      | 16209 | 16392 |
| <i>A. tuberodepressus</i> | 131205   | 299            |                                                                                                                       | 97%            | 2e-52   | 80.69%   | 14107 | 14424 |
| <i>A. mantzorum</i>       | 28208    | 299            |                                                                                                                       | 48%            | 2e-33   | 86.11%   | 12255 | 12398 |
| <i>A. mantzorum</i>       | 207705   | 301            |                                                                                                                       | 41%            | 6e-28   | 86.51%   | 14112 | 14235 |
| <i>A. mantzorum</i>       | 651335   | 298            | <i>Rana rugosa</i>                                                                                                    | 38%            | 2e-33   | 91.23%   | 14107 | 14219 |
| <i>A. mantzorum</i>       | 852213   | 304            | <i>CYP19A1</i> gene<br>for                                                                                            | 38%            | 8e-22   | 84.55%   | 11703 | 11824 |
| <i>A. mantzorum</i>       | 946208#  | 280            | cytochrome                                                                                                            | 95%            | 6e-53   | 81.82%   | 11703 | 11997 |
| <i>A. mantzorum</i>       | 973436   | 298            | P-450<br>aromatase,                                                                                                   | 58%            | 2e-42   | 86.19%   | 14247 | 14424 |
| <i>A. mantzorum</i>       | 1306289  | 257            | promoter                                                                                                              | 98%            | 3e-60   | 84.13%   | 14150 | 14419 |
| <i>A. mantzorum</i>       | 1628703  | 270            | region and<br>partial cds                                                                                             | 69%            | 1e-39   | 89.36%   | 14107 | 14246 |
| <i>A. mantzorum</i>       | 1784854# | 299            | (AB379847.1)                                                                                                          | 21%            | 6e-13   | 92.06%   | 14151 | 14212 |
| <i>A. xinduoqiao</i>      | 546456   | 264            |                                                                                                                       | 90%            | 9e-31   | 78.01%   | 10170 | 10407 |
| <i>A. xinduoqiao</i>      | 708316   | 265            |                                                                                                                       | 41%            | 2e-27   | 88.70%   | 10268 | 10382 |
| <i>A. xinduoqiao</i>      | 376827   | 298            |                                                                                                                       | 33%            | 2e-17   | 85.44%   | 10245 | 10344 |
| <i>A. xinduoqiao</i>      | 694936   | 298            |                                                                                                                       | 47%            | 3e-11   | 77.08%   | 10264 | 10407 |
| <i>A. wuyiensis</i>       | 764303   | 298            | <i>Rana rugosa</i><br><i>AR</i> gene for<br>androgen<br>receptor,<br>promoter,<br>partial<br>sequence<br>(AB491761.1) | 11%            | 1e-04   | 97.14%   | 612   | 646   |

Note: Locus with # represent sex-linked loci was consistent with those identified by Luo et al. 2020 [34].
