# Supplementary material for: Heterogeneous Evolution of Sex Chromosomes in the Torrent Frog Genus Amolops
Source: MDPI journal article supplement (doi:10.3390/ijms231911146), 2022-09-22
Supplement: s1 [file s1]

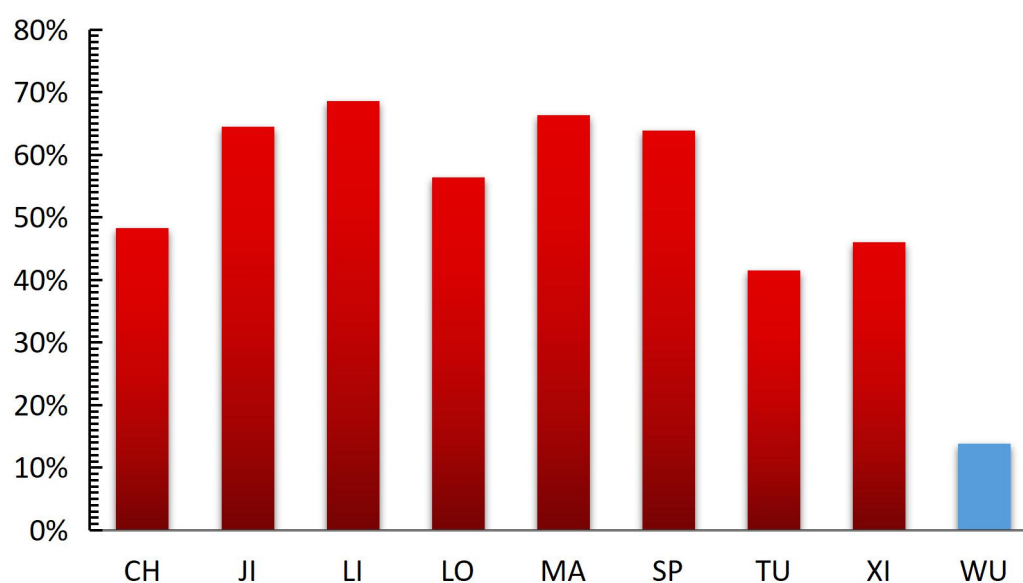

**Figure S1. Rate of aligned sex-linked markers (y axes) for 9 species of *Amolops* aligned to the sex chromosome 5 of *A.mantzorum*** (MA for *A. mantzorum*, SP for *A. sp.*, JI for *A. jinjiangensis*, XI for *A. xinduqiao*, CH for *A. chunganensis*, LI for *A. lifanensis*, TU for *A. tuberodepressus*, LO for *A. loloensis*, WU for *A. wuyiensis*).
