# Supplementary material for: Heterogeneous Evolution of Sex Chromosomes in the Torrent Frog Genus Amolops
Source: MDPI journal article supplement (doi:10.3390/ijms231911146), 2022-09-22
Supplement: s1 [file s1]

**Table S6. Summary of primers for identification of sex-specific SNP markers in *Amolops* species**

| Locus      | Primer sequence (5'–3')            | T (°C) | length (bp) | SNP (X/Y) | SNP (Location) |
|------------|------------------------------------|--------|-------------|-----------|----------------|
| CH_1058318 | Forward: ATTGAAACTTGATTACCG        | 58     | 245         | C/T       | 76             |
|            | Reverse: ATTACTGATGGAGCCTGT        |        |             |           |                |
| CH_2909840 | Forward: TGAGATAAATGCCCAGGTG       | 58     | 211         | A/G       | 105            |
|            | Reverse: GCAGATAGAGCAAAACAGGA      |        |             |           |                |
| JI_483348  | Forward: ACAGCATGTGACTGAAATC       | 58     | 271         | A/G       | 83             |
|            | Reverse: CTGGTATCATCCAAGAAAA       |        |             |           |                |
| JI_1184383 | Forward: ATGGTTCATTTAGTCTAAGGGGATA | 58     | 203         | T/A       | 36             |
|            | Reverse: CCCGCAACATCTTCTCCC        |        |             |           |                |
| LI_174627  | Forward: GTATGCTTTGGGTCGTT         | 58     | 234         | C/A       | 171            |
|            | Reverse: GAATGTGGTTCAGGCTAT        |        |             |           |                |
| LI_375069  | Forward: ATTGTGGAACCCGACG          | 58     | 282         | G/T       | 195            |
|            | Reverse: ACCCCTGTGGGACTGT          |        |             |           |                |
| LI_430733  | Forward: TCTCCAGCAGTTTTTCATT       | 58     | 221         | G/C       | 83_130         |
|            | Reverse: TCCCCTTCTTTTATTGTC        |        |             |           |                |
| LO_550969  | Forward: GGGGATTTTCAGCAACACTTAGG   | 58     | 222         | C/T       | 61             |
|            | Reverse: GTCCGTTCCAGCCCACCT        |        |             |           |                |
| MA_85869   | Forward: CTCCTGGCAACTCCTTTCTG      | 58     | 189         | G/A       | 228            |
|            | Reverse: GAGCCCATATTCAATTCACC      |        |             |           |                |
| SP_110086  | Forward: GGGAAACGGCCCTTGATA        | 58     | 248         | A/G       | 227            |
|            | Reverse: GAAGCACATCTCCCAGTCC       |        |             |           |                |
| SP_208821  | Forward: CGCTTTACACTTCATGCCCA      | 58     | 211         | C/T_C/G   | 193_217        |
|            | Reverse: AGAGTTGGGGAAGATGCCAA      |        |             |           |                |

|            |                                                                           |    |     |         |         |
|------------|---------------------------------------------------------------------------|----|-----|---------|---------|
| SP_271488  | Forward: CGCCAATCCCTTCACCTC<br>Reverse: TACAAACAAAGCACTTCCA               | 58 | 225 | C/T     | 248     |
| SP_476103  | Forward: ATTGACTTTATGCTGTTGGGCTGCTA<br>Reverse: TATTGTTGTAGGGGATTGCAGAGCG | 58 | 253 | C/A     | 265     |
| SP_1399857 | Forward: AGATTTCTTCCCGCACTACTTT<br>Reverse: TAATTACAAGTACCTGAATGTGACC     | 58 | 284 | C/T     | 271     |
| TU_1007365 | Forward: CCCACCAGACAGGAAACAC<br>Reverse: CCGCAGCAATGCCTAAAC               | 58 | 222 | T/G_A/T | 239_251 |
| TU_1150683 | Forward: CAGATTTTGGGGTGTAGA<br>Reverse: ATATTAGATAGATCAGCTTGG             | 58 | 265 | C/A_G/A | 230_242 |
| TU_1390631 | Forward: GGAAAGAACCAGATGACA<br>Reverse: AGAGTTGAACTCCAGCCT                | 58 | 176 | T/C     | 186     |
| TU_1950702 | Forward: ATACCAGAGCTCCAGACC<br>Reverse: ATGACCCAATGTAGATGC                | 58 | 273 | A/G     | 77      |
| TU_2024518 | Forward: ATCTTTGTGCAATCTTTGAT<br>Reverse: CACCCTCTTCCAGTCCAG              | 58 | 253 | G/A_T/G | 202_253 |
| TU_2049833 | Forward: TGTCTTCCTGAGTATCTGC<br>Reverse: AATAGTGCCACAACCTTT               | 58 | 257 | G/A_A/T | 238_249 |
| WU_117656  | Forward: TGCCTGTGAAATACGAC<br>Reverse: GAACACCCAGTTTGATAA                 | 58 | 250 | C/T     | 105     |
| WU_120446  | Forward: AGCCTACAAATAAAACAC<br>Reverse: ATACTACATCAAATAACAGAG             | 58 | 271 | C/A     | 193     |
| WU_177528  | Forward: GCAGTAAAATATGCATCTAAC<br>Reverse: CTAAACACCTTCACTTGGA            | 58 | 234 | G/A     | 160     |

|            |                                                                 |    |     |     |     |
|------------|-----------------------------------------------------------------|----|-----|-----|-----|
| WU_321845  | Forward: CTACCGCCAAGACGGAAAG<br>Reverse: CGGCTGACAGAAAAGCAGAGT  | 58 | 266 | G/A | 136 |
| WU_375485  | Forward: TAACAATGTCCCGAATG<br>Reverse: TATGCGGAGATGAGAAA        | 58 | 288 | G/A | 115 |
| WU_450377  | Forward: GGAATGTGCTTGTATGCT<br>Reverse: ACTAATCAAAGTGCCAGG      | 58 | 218 | A/G | 82  |
| WU_1146109 | Forward: GAAACCCTCACGATTCTATT<br>Reverse: AGCCAGTCTCCCTCCAT     | 58 | 230 | A/C | 233 |
| XI_106254  | Forward: GCGCATACGCTCTGAAGG<br>Reverse: TCCAACTGCCAGCCACCA      | 58 | 215 | G/A | 173 |
| XI_746953  | Forward: AAGTGGATGTAAACCCGATTC<br>Reverse: AGATGATGCCCTCCAGACC  | 58 | 229 | G/A | 82  |
| XI_1266715 | Forward: ACCTTGGAACGAAGCCCTCA<br>Reverse: GCATGACTCCCAAAGGCAGAG | 58 | 261 | G/A | 176 |

Note: The forward and reverse primers were designed at conserved region. T (°C) indicates the annealing temperature of PCR thermal cycling. Length indicates PCR product size. SNP (Location) represents the nucleotide site within the locus, reported using a zero-based offset (first nucleotide is enumerated as 0). In the Locus column, CH for *A. chunganensis*, JI for *A. jinjiangensis*, LI for *A. lifanensis*, LO for *A. loloensis*, MA for *A. mantzorum*, SP for *A. sp.*, TU for *A. tuberodepressus*, WU for *A. wuyiensis*, XI for *A. xinduiqiao*, and the number represents the locus ID in the catalog.
