# Supplementary material for: Heterogeneous Evolution of Sex Chromosomes in the Torrent Frog Genus Amolops
Source: MDPI journal article supplement (doi:10.3390/ijms231911146), 2022-09-22
Supplement: s1 [file s1]

## File S9

The information of five sex-linked markers and their cross-species homologous sequences in each species used to construct the maximum likelihood tree. The sequence alignment was completed using the *blastn* command, the homologous sequence of the sex-linked loci of one *Amolops* in other *Amolops* species was selected, and only the alignment result of e-value  $\leq 1 \times 10^{-20}$  was retained.

**Table S1. Homologous sequences of sex-linked loci of *A. chunganensis* in *A. jinjiangensis* data set**

| Sex-linked markers ID<br>( <i>A. chunganensis</i> ) | Locus ID<br>( <i>A. jinjiangensis</i> ) | Identical(%) | Evalue    | Bitscore | Start<br>( <i>A. chunganensis</i> ) | End<br>( <i>A. chunganensis</i> ) | Start<br>( <i>A. jinjiangensis</i> ) | End<br>( <i>A. jinjiangensis</i> ) |
|-----------------------------------------------------|-----------------------------------------|--------------|-----------|----------|-------------------------------------|-----------------------------------|--------------------------------------|------------------------------------|
| 461783                                              | 2110614                                 | 95.318       | 5.77E-120 | 436      | 1                                   | 298                               | 298                                  | 1                                  |
| 697780                                              | 1030788                                 | 87.898       | 1.71E-95  | 355      | 1                                   | 306                               | 1                                    | 298                                |
| 775866                                              | 3460668                                 | 96.774       | 6.84E-129 | 466      | 1                                   | 279                               | 1                                    | 279                                |
| 1058318                                             | 1875209                                 | 97.436       | 6.68E-129 | 466      | 1                                   | 273                               | 1                                    | 273                                |
| 2189594                                             | 2443502                                 | 94.224       | 4.14E-116 | 424      | 1                                   | 277                               | 277                                  | 1                                  |

**Table S2. Homologous sequences of sex-linked loci of *A. chunganensis* in *A. lifanensis* data set**

| Sex-linked markers ID<br>( <i>A. chunganensis</i> ) | Locus ID<br>( <i>A. lifanensis</i> ) | Identical(%) | Evalue    | Bitscore | Start<br>( <i>A. chunganensis</i> ) | End<br>( <i>A. chunganensis</i> ) | Start<br>( <i>A. lifanensis</i> ) | End<br>( <i>A. lifanensis</i> ) |
|-----------------------------------------------------|--------------------------------------|--------------|-----------|----------|-------------------------------------|-----------------------------------|-----------------------------------|---------------------------------|
| 461783                                              | 4145131                              | 95.987       | 3.21E-123 | 448      | 1                                   | 298                               | 298                               | 1                               |
| 697780                                              | 2752294                              | 89.644       | 2.03E-105 | 388      | 1                                   | 306                               | 1                                 | 298                             |
| 775866                                              | 952435                               | 96.774       | 8.23E-129 | 466      | 1                                   | 279                               | 1                                 | 279                             |
| 1058318                                             | 899717                               | 97.436       | 6.21E-130 | 470      | 1                                   | 273                               | 1                                 | 273                             |
| 2189594                                             | 209343                               | 91.636       | 3.04E-103 | 381      | 1                                   | 272                               | 1                                 | 275                             |

**Table S3. Homologous sequences of sex-linked loci of *A. chunganensis* in *A. loloensis* data set**

| Sex-linked markers ID<br>( <i>A. chunganensis</i> ) | Locus ID<br>( <i>A. loloensis</i> ) | Identical(%) | Evalue    | Bitscore | Start<br>( <i>A. chunganensis</i> ) | End<br>( <i>A. chunganensis</i> ) | Start<br>( <i>A. loloensis</i> ) | End<br>( <i>A. loloensis</i> ) |
|-----------------------------------------------------|-------------------------------------|--------------|-----------|----------|-------------------------------------|-----------------------------------|----------------------------------|--------------------------------|
| 461783                                              | 1294504                             | 94.04        | 2.15E-113 | 414      | 1                                   | 298                               | 1                                | 298                            |
| 697780                                              | 104026                              | 94.667       | 7.78E-123 | 446      | 11                                  | 306                               | 298                              | 1                              |
| 775866                                              | 3345839                             | 96.416       | 2.53E-127 | 460      | 1                                   | 279                               | 279                              | 1                              |
| 1058318                                             | 2597914                             | 96.715       | 1.15E-125 | 455      | 1                                   | 273                               | 273                              | 1                              |
| 2189594                                             | 356968                              | 91.367       | 9.34E-102 | 375      | 1                                   | 275                               | 1                                | 275                            |

**Table S4. Homologous sequences of sex-linked loci of *A. chunganensis* in *A. mantzorum* data set**

| Sex-linked markers ID<br>( <i>A. chunganensis</i> ) | Locus ID<br>( <i>A. mantzorum</i> ) | Identical(%) | Evalue    | Bitscore | Start<br>( <i>A. chunganensis</i> ) | End<br>( <i>A. chunganensis</i> ) | Start<br>( <i>A. mantzorum</i> ) | End<br>( <i>A. mantzorum</i> ) |
|-----------------------------------------------------|-------------------------------------|--------------|-----------|----------|-------------------------------------|-----------------------------------|----------------------------------|--------------------------------|
| 461783                                              | 2795554                             | 93.709       | 2.52E-111 | 409      | 1                                   | 298                               | 1                                | 298                            |
| 697780                                              | 1955749                             | 87.048       | 1.22E-99  | 370      | 1                                   | 306                               | 1                                | 332                            |
| 775866                                              | 5052676                             | 96.774       | 1.38E-128 | 466      | 1                                   | 279                               | 1                                | 279                            |
| 1058318                                             | 3100419                             | 97.07        | 6.26E-127 | 460      | 1                                   | 273                               | 1                                | 273                            |
| 2189594                                             | 4388276                             | 90.909       | 1.43E-98  | 366      | 1                                   | 272                               | 1                                | 274                            |

**Table S5. Homologous sequences of sex-linked loci of *A. chunganensis* in *A. sp.* data set**

| Sex-linked markers ID<br>( <i>A. chunganensis</i> ) | Locus ID<br>( <i>A. sp.</i> ) | Identical(%) | Evalue    | Bitscore | Start<br>( <i>A. chunganensis</i> ) | End<br>( <i>A. chunganensis</i> ) | Start<br>( <i>A. sp.</i> ) | End<br>( <i>A. sp.</i> ) |
|-----------------------------------------------------|-------------------------------|--------------|-----------|----------|-------------------------------------|-----------------------------------|----------------------------|--------------------------|
| 461783                                              | 977050                        | 94.04        | 1.86E-113 | 414      | 1                                   | 298                               | 1                          | 298                      |
| 697780                                              | 1767937                       | 87.58        | 5.48E-94  | 350      | 1                                   | 306                               | 298                        | 1                        |
| 775866                                              | 281433                        | 96.774       | 4.71E-129 | 466      | 1                                   | 279                               | 279                        | 1                        |
| 1058318                                             | 1644201                       | 96.337       | 4.63E-124 | 449      | 1                                   | 273                               | 273                        | 1                        |
| 2189594                                             | 1943477                       | 94.224       | 2.85E-116 | 424      | 1                                   | 277                               | 1                          | 277                      |

**Table S6. Homologous sequences of sex-linked loci of *A. chunganensis* in *A. tuberodepressus* data set**

| Sex-linked markers ID<br>( <i>A. chunganensis</i> ) | Locus ID<br>( <i>A. tuberodepressus</i> ) | Identical(%) | Evalue    | Bitscore | Start<br>( <i>A. chunganensis</i> ) | End<br>( <i>A. chunganensis</i> ) | Start<br>( <i>A. tuberodepressus</i> ) | End<br>( <i>A. tuberodepressus</i> ) |
|-----------------------------------------------------|-------------------------------------------|--------------|-----------|----------|-------------------------------------|-----------------------------------|----------------------------------------|--------------------------------------|
| 461783                                              | 2178382                                   | 93.709       | 2.21E-111 | 409      | 1                                   | 298                               | 298                                    | 1                                    |
| 697780                                              | 1122835                                   | 94.175       | 6.24E-122 | 444      | 1                                   | 306                               | 305                                    | 1                                    |
| 775866                                              | 4575332                                   | 96.416       | 1.55E-127 | 462      | 1                                   | 279                               | 279                                    | 1                                    |
| 1058318                                             | 1126095                                   | 97.07        | 4.21E-128 | 464      | 1                                   | 273                               | 1                                      | 273                                  |
| 2189594                                             | 122696                                    | 94.224       | 7.27E-116 | 424      | 1                                   | 277                               | 277                                    | 1                                    |

**Table S7. Homologous sequences of sex-linked loci of *A. chunganensis* in *A. xinduoqiao* data set**

| Sex-linked markers ID<br>( <i>A. chunganensis</i> ) | Locus ID<br>( <i>A. xinduoqiao</i> ) | Identical(%) | Evalue    | Bitscore | Start<br>( <i>A. chunganensis</i> ) | End<br>( <i>A. chunganensis</i> ) | Start<br>( <i>A. xinduoqiao</i> ) | End<br>( <i>A. xinduoqiao</i> ) |
|-----------------------------------------------------|--------------------------------------|--------------|-----------|----------|-------------------------------------|-----------------------------------|-----------------------------------|---------------------------------|
| 461783                                              | 1482208                              | 93.709       | 2.53E-111 | 409      | 1                                   | 298                               | 1                                 | 298                             |
| 697780                                              | 2979510                              | 89.172       | 1.58E-103 | 383      | 1                                   | 306                               | 303                               | 1                               |
| 775866                                              | 12127                                | 96.416       | 6.45E-127 | 460      | 1                                   | 279                               | 279                               | 1                               |
| 1058318                                             | 2685487                              | 97.802       | 2.91E-130 | 472      | 1                                   | 273                               | 1                                 | 273                             |
| 2189594                                             | 3345455                              | 93.502       | 1.82E-112 | 412      | 1                                   | 277                               | 1                                 | 277                             |

**Table S8. Homologous sequences of sex-linked loci of *A. jinjiangensis* in *A. chunganensis* data set**

| Sex-linked markers ID<br>( <i>A. jinjiangensis</i> ) | Locus ID<br>( <i>A. chunganensis</i> ) | Identical(%) | Evalue    | Bitscore | Start<br>( <i>A. jinjiangensis</i> ) | End<br>( <i>A. jinjiangensis</i> ) | Start<br>( <i>A. chunganensis</i> ) | End<br>( <i>A. chunganensis</i> ) |
|------------------------------------------------------|----------------------------------------|--------------|-----------|----------|--------------------------------------|------------------------------------|-------------------------------------|-----------------------------------|
| 94572                                                | 1672562                                | 89.109       | 2.07E-91  | 342      | 1                                    | 298                                | 298                                 | 1                                 |
| 261570                                               | 1215526                                | 94           | 4.33E-113 | 414      | 1                                    | 298                                | 299                                 | 1                                 |
| 263214                                               | 426971                                 | 89.597       | 2.07E-91  | 342      | 1                                    | 298                                | 1                                   | 298                               |
| 458997                                               | 2072145                                | 86.688       | 4.55E-78  | 298      | 1                                    | 298                                | 1                                   | 298                               |
| 1196026                                              | 661659                                 | 95.686       | 4.7E-112  | 411      | 1                                    | 255                                | 1                                   | 255                               |

**Table S9. Homologous sequences of sex-linked loci of *A. jinjiangensis* in *A. lifanensis* data set**

| Sex-linked markers ID<br>( <i>A. jinjiangensis</i> ) | Locus ID<br>( <i>A. lifanensis</i> ) | Identical(%) | Evalue    | Bitscore | Start<br>( <i>A. jinjiangensis</i> ) | End<br>( <i>A. jinjiangensis</i> ) | Start<br>( <i>A. lifanensis</i> ) | End<br>( <i>A. lifanensis</i> ) |
|------------------------------------------------------|--------------------------------------|--------------|-----------|----------|--------------------------------------|------------------------------------|-----------------------------------|---------------------------------|
| 94572                                                | 1304512                              | 95.333       | 6.94E-120 | 436      | 1                                    | 298                                | 1                                 | 298                             |
| 261570                                               | 486972                               | 89.644       | 7.25E-90  | 337      | 1                                    | 298                                | 298                               | 1                               |
| 263214                                               | 1094956                              | 94.631       | 1.5E-116  | 425      | 1                                    | 298                                | 1                                 | 298                             |
| 458997                                               | 2347274                              | 94.098       | 3.25E-113 | 414      | 1                                    | 298                                | 298                               | 1                               |
| 1196026                                              | 2216461                              | 96.471       | 1.63E-115 | 422      | 1                                    | 255                                | 1                                 | 255                             |

**Table S10. Homologous sequences of sex-linked loci of *A. jinjiangensis* in *A. loloensis* data set**

| Sex-linked markers ID<br>( <i>A. jinjiangensis</i> ) | Locus ID<br>( <i>A. loloensis</i> ) | Identical(%) | Evalue    | Bitscore | Start<br>( <i>A. jinjiangensis</i> ) | End<br>( <i>A. jinjiangensis</i> ) | Start<br>( <i>A. loloensis</i> ) | End<br>( <i>A. loloensis</i> ) |
|------------------------------------------------------|-------------------------------------|--------------|-----------|----------|--------------------------------------|------------------------------------|----------------------------------|--------------------------------|
| 94572                                                | 236816                              | 93.709       | 9.92E-117 | 425      | 1                                    | 298                                | 1                                | 302                            |
| 261570                                               | 1238477                             | 89.037       | 2.23E-88  | 331      | 1                                    | 298                                | 298                              | 1                              |
| 263214                                               | 710099                              | 92.617       | 1.01E-106 | 392      | 1                                    | 298                                | 298                              | 1                              |
| 458997                                               | 753555                              | 93.464       | 2.15E-113 | 414      | 1                                    | 298                                | 298                              | 1                              |
| 1196026                                              | 2261018                             | 97.647       | 1.07E-120 | 438      | 1                                    | 255                                | 255                              | 1                              |

**Table S11. Homologous sequences of sex-linked loci of *A. jinjiangensis* in *A. sp.* data set**

| Sex-linked markers ID<br>( <i>A. jinjiangensis</i> ) | Locus ID<br>( <i>A. sp.</i> ) | Identical(%) | Evalue    | Bitscore | Start<br>( <i>A. jinjiangensis</i> ) | End<br>( <i>A. jinjiangensis</i> ) | Start<br>( <i>A. sp.</i> ) | End<br>( <i>A. sp.</i> ) |
|------------------------------------------------------|-------------------------------|--------------|-----------|----------|--------------------------------------|------------------------------------|----------------------------|--------------------------|
| 94572                                                | 542643                        | 97           | 1.82E-128 | 464      | 1                                    | 298                                | 1                          | 298                      |
| 261570                                               | 2036540                       | 84.158       | 2E-63     | 248      | 1                                    | 298                                | 298                        | 1                        |
| 263214                                               | 2217973                       | 98.993       | 1.8E-138  | 497      | 1                                    | 298                                | 298                        | 1                        |
| 458997                                               | 76560                         | 94.426       | 4E-115    | 420      | 1                                    | 298                                | 298                        | 1                        |
| 1196026                                              | 1459014                       | 97.647       | 9.28E-121 | 438      | 1                                    | 255                                | 255                        | 1                        |

**Table S12. Homologous sequences of sex-linked loci of *A. jinjiangensis* in *A. tuberodepressus* data set**

| Sex-linked markers ID<br>( <i>A. jinjiangensis</i> ) | Locus ID<br>( <i>A. tuberodepressus</i> ) | Identical(%) | Evalue    | Bitscore | Start<br>( <i>A. jinjiangensis</i> ) | End<br>( <i>A. jinjiangensis</i> ) | Start<br>( <i>A. tuberodepressus</i> ) | End<br>( <i>A. tuberodepressus</i> ) |
|------------------------------------------------------|-------------------------------------------|--------------|-----------|----------|--------------------------------------|------------------------------------|----------------------------------------|--------------------------------------|
| 94572                                                | 1103762                                   | 97.333       | 9.99E-130 | 470      | 1                                    | 298                                | 1                                      | 298                                  |
| 261570                                               | 472065                                    | 85.382       | 6.5E-72   | 278      | 1                                    | 298                                | 1                                      | 298                                  |
| 263214                                               | 2556934                                   | 91.611       | 2.24E-101 | 375      | 1                                    | 298                                | 298                                    | 1                                    |
| 458997                                               | 290229                                    | 94.098       | 1.02E-114 | 420      | 1                                    | 298                                | 1                                      | 298                                  |
| 1196026                                              | 1957719                                   | 97.647       | 2.37E-120 | 438      | 1                                    | 255                                | 255                                    | 1                                    |

**Table S13. Homologous sequences of sex-linked loci of *A. jinjiangensis* in *A. xinduoqiao* data set**

| Sex-linked markers ID<br>( <i>A. jinjiangensis</i> ) | Locus ID<br>( <i>A. xinduoqiao</i> ) | Identical(%) | Evalue    | Bitscore | Start<br>( <i>A. jinjiangensis</i> ) | End<br>( <i>A. jinjiangensis</i> ) | Start<br>( <i>A. xinduoqiao</i> ) | End<br>( <i>A. xinduoqiao</i> ) |
|------------------------------------------------------|--------------------------------------|--------------|-----------|----------|--------------------------------------|------------------------------------|-----------------------------------|---------------------------------|
| 94572                                                | 5270733                              | 96.013       | 5.36E-123 | 448      | 1                                    | 298                                | 1                                 | 298                             |
| 261570                                               | 4392578                              | 90.268       | 1.57E-88  | 333      | 1                                    | 292                                | 298                               | 12                              |
| 263214                                               | 1053882                              | 97.987       | 5.29E-133 | 481      | 1                                    | 298                                | 1                                 | 298                             |
| 458997                                               | 2054748                              | 95.082       | 5.4E-118  | 431      | 1                                    | 298                                | 1                                 | 298                             |
| 1196026                                              | 1462974                              | 97.647       | 2.73E-120 | 438      | 1                                    | 255                                | 1                                 | 255                             |

**Table S14. Homologous sequences of sex-linked loci of *A. lifanensis* in *A. chunganensis* data set**

| Sex-linked markers ID<br>( <i>A. lifanensis</i> ) | Locus ID<br>( <i>A. chunganensis</i> ) | Identical(%) | Evalue    | Bitscore | Start<br>( <i>A. lifanensis</i> ) | End<br>( <i>A. lifanensis</i> ) | Start<br>( <i>A. chunganensis</i> ) | End<br>( <i>A. chunganensis</i> ) |
|---------------------------------------------------|----------------------------------------|--------------|-----------|----------|-----------------------------------|---------------------------------|-------------------------------------|-----------------------------------|
| 3479                                              | 71109                                  | 96.476       | 2.95E-100 | 372      | 1                                 | 224                             | 227                                 | 1                                 |
| 174627                                            | 1203846                                | 98.23        | 4.75E-48  | 198      | 1                                 | 113                             | 298                                 | 186                               |
| 409308                                            | 1221012                                | 88.699       | 2.43E-90  | 339      | 1                                 | 273                             | 292                                 | 1                                 |
| 520205                                            | 1050739                                | 89.298       | 3.4E-104  | 385      | 1                                 | 298                             | 292                                 | 1                                 |
| 974082                                            | 831512                                 | 97.993       | 4.21E-133 | 481      | 1                                 | 298                             | 1                                   | 298                               |



**Table S15. Homologous sequences of sex-linked loci of *A. lifanensis* in *A. jinjiangensis* data set**

| Sex-linked markers ID<br>( <i>A. lifanensis</i> ) | Locus ID<br>( <i>A. jinjiangensis</i> ) | Identical(%) | Evalue    | Bitscore | Start<br>( <i>A. lifanensis</i> ) | End<br>( <i>A. lifanensis</i> ) | Start<br>( <i>A. jinjiangensis</i> ) | End<br>( <i>A. jinjiangensis</i> ) |
|---------------------------------------------------|-----------------------------------------|--------------|-----------|----------|-----------------------------------|---------------------------------|--------------------------------------|------------------------------------|
| 3479                                              | 1733626                                 | 98.667       | 3.04E-108 | 398      | 1                                 | 224                             | 225                                  | 1                                  |
| 174627                                            | 1443356                                 | 98.23        | 2.97E-48  | 198      | 1                                 | 113                             | 280                                  | 168                                |
| 409308                                            | 920846                                  | 84.298       | 1.23E-56  | 226      | 4                                 | 237                             | 16                                   | 253                                |
| 520205                                            | 687381                                  | 92.617       | 1.24E-121 | 442      | 1                                 | 298                             | 293                                  | 1                                  |
| 974082                                            | 564896                                  | 97.315       | 5.69E-130 | 470      | 1                                 | 298                             | 298                                  | 1                                  |

**Table S16. Homologous sequences of sex-linked loci of *A. lifanensis* in *A. mantzorum* data set**

| Sex-linked markers ID<br>( <i>A. lifanensis</i> ) | Locus ID<br>( <i>A. mantzorum</i> ) | Identical(%) | Evalue    | Bitscore | Start<br>( <i>A. lifanensis</i> ) | End<br>( <i>A. lifanensis</i> ) | Start<br>( <i>A. mantzorum</i> ) | End<br>( <i>A. mantzorum</i> ) |
|---------------------------------------------------|-------------------------------------|--------------|-----------|----------|-----------------------------------|---------------------------------|----------------------------------|--------------------------------|
| 3479                                              | 2258388                             | 97.788       | 1.02E-105 | 390      | 1                                 | 224                             | 226                              | 1                              |
| 174627                                            | 5267705                             | 97.345       | 2.76E-46  | 193      | 1                                 | 113                             | 395                              | 283                            |
| 409308                                            | 668200                              | 81.513       | 3.26E-45  | 189      | 4                                 | 238                             | 16                               | 249                            |
| 520205                                            | 2698178                             | 94.389       | 1.16E-114 | 420      | 1                                 | 298                             | 298                              | 1                              |
| 974082                                            | 905811                              | 98.322       | 1.13E-134 | 486      | 1                                 | 298                             | 1                                | 298                            |

**Table S17. Homologous sequences of sex-linked loci of *A. lifanensis* in *A. tuberodepressus* data set**

| Sex-linked markers ID<br>( <i>A. lifanensis</i> ) | Locus ID<br>( <i>A. tuberodepressus</i> ) | Identical(%) | Evalue    | Bitscore | Start<br>( <i>A. lifanensis</i> ) | End<br>( <i>A. lifanensis</i> ) | Start<br>( <i>A. tuberodepressus</i> ) | End<br>( <i>A. tuberodepressus</i> ) |
|---------------------------------------------------|-------------------------------------------|--------------|-----------|----------|-----------------------------------|---------------------------------|----------------------------------------|--------------------------------------|
| 3479                                              | 562102                                    | 98.673       | 4.09E-109 | 401      | 1                                 | 226                             | 1                                      | 226                                  |
| 174627                                            | 5419129                                   | 95.385       | 8.65E-51  | 207      | 1                                 | 130                             | 314                                    | 185                                  |
| 409308                                            | 1136600                                   | 81.818       | 2.2E-46   | 193      | 2                                 | 234                             | 38                                     | 277                                  |
| 520205                                            | 3769210                                   | 93.729       | 2.21E-111 | 409      | 1                                 | 298                             | 1                                      | 298                                  |
| 974082                                            | 669400                                    | 98.322       | 9.92E-135 | 486      | 1                                 | 298                             | 298                                    | 1                                    |

**Table S18. Homologous sequences of sex-linked loci of *A. lifanensis* in *A. xinduoqiao* data set**

| Sex-linked markers ID<br>( <i>A. lifanensis</i> ) | Locus ID<br>( <i>A. xinduoqiao</i> ) | Identical(%) | Evalue    | Bitscore | Start<br>( <i>A. lifanensis</i> ) | End<br>( <i>A. lifanensis</i> ) | Start<br>( <i>A. xinduoqiao</i> ) | End<br>( <i>A. xinduoqiao</i> ) |
|---------------------------------------------------|--------------------------------------|--------------|-----------|----------|-----------------------------------|---------------------------------|-----------------------------------|---------------------------------|
| 3479                                              | 799857                               | 98.667       | 6.11E-108 | 398      | 1                                 | 224                             | 225                               | 1                               |
| 174627                                            | 2298766                              | 96.85        | 2.13E-52  | 213      | 1                                 | 227                             | 1                                 | 227                             |
| 409308                                            | 1585742                              | 84.211       | 6.95E-57  | 228      | 4                                 | 239                             | 262                               | 19                              |
| 520205                                            | 1739894                              | 94.389       | 1.17E-114 | 420      | 1                                 | 298                             | 298                               | 1                               |
| 974082                                            | 525096                               | 98.322       | 1.14E-134 | 486      | 1                                 | 298                             | 298                               | 1                               |

**Table S19. Homologous sequences of sex-linked loci of *A. loloensis* in *A. chunganensis* data set**

| Sex-linked markers ID<br>( <i>A. loloensis</i> ) | Locus ID<br>( <i>A. chunganensis</i> ) | Identical(%) | Evalue    | Bitscore | Start<br>( <i>A. loloensis</i> ) | End<br>( <i>A. loloensis</i> ) | Start<br>( <i>A. chunganensis</i> ) | End<br>( <i>A. chunganensis</i> ) |
|--------------------------------------------------|----------------------------------------|--------------|-----------|----------|----------------------------------|--------------------------------|-------------------------------------|-----------------------------------|
| 108264                                           | 3403088                                | 87.248       | 9.78E-80  | 303      | 1                                | 298                            | 298                                 | 1                                 |
| 287692                                           | 734673                                 | 95.667       | 1.99E-121 | 442      | 1                                | 298                            | 298                                 | 1                                 |
| 474811                                           | 429568                                 | 97.03        | 2E-131    | 475      | 1                                | 303                            | 1                                   | 298                               |
| 771638                                           | 1612255                                | 90.345       | 1.33E-43  | 183      | 1                                | 144                            | 304                                 | 167                               |
| 1179745                                          | 1719370                                | 96.644       | 1.97E-126 | 459      | 1                                | 298                            | 1                                   | 298                               |

**Table S20. Homologous sequences of sex-linked loci of *A. loloensis* in *A. jinjiangensis* data set**

| Sex-linked markers ID<br>( <i>A. loloensis</i> ) | Locus ID<br>( <i>A. jinjiangensis</i> ) | Identical(%) | Evalue    | Bitscore | Start<br>( <i>A. loloensis</i> ) | End<br>( <i>A. loloensis</i> ) | Start<br>( <i>A. jinjiangensis</i> ) | End<br>( <i>A. jinjiangensis</i> ) |
|--------------------------------------------------|-----------------------------------------|--------------|-----------|----------|----------------------------------|--------------------------------|--------------------------------------|------------------------------------|
| 108264                                           | 112941                                  | 87.584       | 1.31E-81  | 309      | 1                                | 298                            | 1                                    | 298                                |
| 287692                                           | 93880                                   | 99.664       | 1.21E-141 | 508      | 1                                | 298                            | 1                                    | 298                                |
| 474811                                           | 402610                                  | 98.35        | 1.24E-136 | 492      | 1                                | 303                            | 1                                    | 299                                |
| 771638                                           | 639274                                  | 98.658       | 1.21E-136 | 492      | 1                                | 298                            | 1                                    | 298                                |
| 1179745                                          | 506343                                  | 98.993       | 2.61E-138 | 497      | 1                                | 298                            | 1                                    | 298                                |

**Table S21. Homologous sequences of sex-linked loci of *A. loloensis* in *A. lifanensis* data set**

| Sex-linked markers ID<br>( <i>A. loloensis</i> ) | Locus ID<br>( <i>A. lifanensis</i> ) | Identical(%) | Evalue    | Bitscore | Start<br>( <i>A. loloensis</i> ) | End<br>( <i>A. loloensis</i> ) | Start<br>( <i>A. lifanensis</i> ) | End<br>( <i>A. lifanensis</i> ) |
|--------------------------------------------------|--------------------------------------|--------------|-----------|----------|----------------------------------|--------------------------------|-----------------------------------|---------------------------------|
| 108264                                           | 3191293                              | 86.622       | 1.59E-76  | 292      | 1                                | 298                            | 1                                 | 298                             |
| 287692                                           | 2937545                              | 96.667       | 1.48E-126 | 459      | 1                                | 298                            | 1                                 | 298                             |
| 474811                                           | 2883                                 | 97.03        | 1.5E-131  | 475      | 1                                | 303                            | 298                               | 1                               |
| 771638                                           | 946832                               | 97.368       | 4.61E-47  | 195      | 1                                | 114                            | 1                                 | 114                             |
| 1179745                                          | 2505355                              | 98.658       | 1.46E-136 | 492      | 1                                | 298                            | 298                               | 1                               |

**Table S22. Homologous sequences of sex-linked loci of *A. loloensis* in *A. mantzorum* data set**

| Sex-linked markers ID<br>( <i>A. loloensis</i> ) | Locus ID<br>( <i>A. mantzorum</i> ) | Identical(%) | Evalue    | Bitscore | Start<br>( <i>A. loloensis</i> ) | End<br>( <i>A. loloensis</i> ) | Start<br>( <i>A. mantzorum</i> ) | End<br>( <i>A. mantzorum</i> ) |
|--------------------------------------------------|-------------------------------------|--------------|-----------|----------|----------------------------------|--------------------------------|----------------------------------|--------------------------------|
| 108264                                           | 3815641                             | 98.322       | 1.13E-134 | 486      | 1                                | 298                            | 298                              | 1                              |
| 287692                                           | 2130493                             | 100          | 5.18E-143 | 514      | 1                                | 298                            | 1                                | 298                            |
| 474811                                           | 1044498                             | 97.712       | 5.32E-138 | 497      | 1                                | 303                            | 305                              | 1                              |
| 771638                                           | 1031605                             | 98.658       | 2.43E-136 | 492      | 1                                | 298                            | 1                                | 298                            |
| 1179745                                          | 5257305                             | 95.833       | 1.63E-58  | 233      | 1                                | 144                            | 1                                | 144                            |

**Table S23. Homologous sequences of sex-linked loci of *A. loloensis* in *A. sp.* data set**

| Sex-linked markers ID<br>( <i>A. loloensis</i> ) | Locus ID<br>( <i>A. sp.</i> ) | Identical(%) | Evalue    | Bitscore | Start<br>( <i>A. loloensis</i> ) | End<br>( <i>A. loloensis</i> ) | Start<br>( <i>A. sp.</i> ) | End<br>( <i>A. sp.</i> ) |
|--------------------------------------------------|-------------------------------|--------------|-----------|----------|----------------------------------|--------------------------------|----------------------------|--------------------------|
| 108264                                           | 1039898                       | 96.98        | 1.82E-128 | 464      | 1                                | 298                            | 298                        | 1                        |
| 287692                                           | 857417                        | 100          | 1.78E-143 | 514      | 1                                | 298                            | 1                          | 298                      |
| 474811                                           | 109312                        | 98.68        | 5.09E-139 | 499      | 1                                | 303                            | 302                        | 1                        |
| 771638                                           | 3226069                       | 97.368       | 2.64E-47  | 195      | 1                                | 144                            | 1                          | 144                      |
| 1179745                                          | 1221440                       | 98.993       | 1.8E-138  | 497      | 1                                | 298                            | 298                        | 1                        |

**Table S24. Homologous sequences of sex-linked loci of *A. loloensis* in *A. tuberodepressus* data set**

| Sex-linked markers ID<br>( <i>A. loloensis</i> ) | Locus ID<br>( <i>A. tuberodepressus</i> ) | Identical(%) | Evalue    | Bitscore | Start<br>( <i>A. loloensis</i> ) | End<br>( <i>A. loloensis</i> ) | Start<br>( <i>A. tuberodepressus</i> ) | End<br>( <i>A. tuberodepressus</i> ) |
|--------------------------------------------------|-------------------------------------------|--------------|-----------|----------|----------------------------------|--------------------------------|----------------------------------------|--------------------------------------|
| 108264                                           | 1512792                                   | 97.651       | 2.15E-131 | 475      | 1                                | 298                            | 1                                      | 298                                  |
| 287692                                           | 2789373                                   | 97.667       | 2.15E-131 | 475      | 1                                | 298                            | 1                                      | 298                                  |
| 474811                                           | 1279897                                   | 96.04        | 3.61E-139 | 501      | 1                                | 303                            | 299                                    | 1                                    |
| 771638                                           | 2021930                                   | 98.658       | 2.13E-136 | 492      | 1                                | 298                            | 298                                    | 1                                    |
| 1179745                                          | 2243614                                   | 96.364       | 4.75E-113 | 414      | 1                                | 275                            | 1                                      | 273                                  |

**Table S25. Homologous sequences of sex-linked loci of *A. loloensis* in *A. xinduoqiao* data set**

| Sex-linked markers ID<br>( <i>A. loloensis</i> ) | Locus ID<br>( <i>A. xinduoqiao</i> ) | Identical(%) | Evalue    | Bitscore | Start<br>( <i>A. loloensis</i> ) | End<br>( <i>A. loloensis</i> ) | Start<br>( <i>A. xinduoqiao</i> ) | End<br>( <i>A. xinduoqiao</i> ) |
|--------------------------------------------------|--------------------------------------|--------------|-----------|----------|----------------------------------|--------------------------------|-----------------------------------|---------------------------------|
| 108264                                           | 536937                               | 89.597       | 2.6E-91   | 342      | 1                                | 298                            | 298                               | 1                               |
| 287692                                           | 6866398                              | 100          | 3.64E-35  | 156      | 1                                | 84                             | 1                                 | 84                              |
| 474811                                           | 1908187                              | 95.71        | 5.35E-138 | 497      | 1                                | 303                            | 1                                 | 300                             |
| 771638                                           | 747170                               | 98.658       | 2.44E-136 | 492      | 1                                | 298                            | 1                                 | 298                             |
| 1179745                                          | 3216699                              | 98.993       | 5.25E-138 | 497      | 1                                | 298                            | 298                               | 1                               |

**Table S26. Homologous sequences of sex-linked loci of *A. mantzorum* in *A. chunganensis* data set**

| Sex-linked markers ID<br>( <i>A. mantzorum</i> ) | Locus ID<br>( <i>A. chunganensis</i> ) | Identical(%) | Evalue    | Bitscore | Start<br>( <i>A. mantzorum</i> ) | End<br>( <i>A. mantzorum</i> ) | Start<br>( <i>A. chunganensis</i> ) | End<br>( <i>A. chunganensis</i> ) |
|--------------------------------------------------|----------------------------------------|--------------|-----------|----------|----------------------------------|--------------------------------|-------------------------------------|-----------------------------------|
| 240963                                           | 1902753                                | 96.309       | 9.18E-125 | 453      | 1                                | 298                            | 1                                   | 298                               |
| 305583                                           | 1394718                                | 95.638       | 1.99E-121 | 442      | 1                                | 298                            | 298                                 | 1                                 |
| 328452                                           | 809288                                 | 96.309       | 9.18E-125 | 453      | 1                                | 298                            | 1                                   | 298                               |
| 337208                                           | 817863                                 | 81.046       | 7.57E-61  | 241      | 1                                | 291                            | 1                                   | 298                               |
| 650096                                           | 4523944                                | 81.377       | 3.67E-49  | 202      | 1                                | 232                            | 1                                   | 245                               |

**Table S27. Homologous sequences of sex-linked loci of *A. mantzorum* in *A. jinjiangensis* data set**

| Sex-linked markers ID<br>( <i>A. mantzorum</i> ) | Locus ID<br>( <i>A. jinjiangensis</i> ) | Identical(%) | Evalue    | Bitscore | Start<br>( <i>A. mantzorum</i> ) | End<br>( <i>A. mantzorum</i> ) | Start<br>( <i>A. jinjiangensis</i> ) | End<br>( <i>A. jinjiangensis</i> ) |
|--------------------------------------------------|-----------------------------------------|--------------|-----------|----------|----------------------------------|--------------------------------|--------------------------------------|------------------------------------|
| 240963                                           | 2294607                                 | 98.322       | 5.65E-135 | 486      | 1                                | 298                            | 1                                    | 298                                |
| 305583                                           | 936978                                  | 97.987       | 2.63E-133 | 481      | 1                                | 298                            | 1                                    | 298                                |
| 328452                                           | 1027974                                 | 99.329       | 5.61E-140 | 503      | 1                                | 298                            | 298                                  | 1                                  |
| 337208                                           | 826141                                  | 94.631       | 7.17E-129 | 466      | 1                                | 291                            | 298                                  | 1                                  |
| 650096                                           | 284428                                  | 95.38        | 5.77E-120 | 436      | 1                                | 298                            | 1                                    | 298                                |

**Table S28. Homologous sequences of sex-linked loci of *A. mantzorum* in *A. lifanensis* data set**

| Sex-linked markers ID<br>( <i>A. mantzorum</i> ) | Locus ID<br>( <i>A. lifanensis</i> ) | Identical(%) | Evalue    | Bitscore | Start<br>( <i>A. mantzorum</i> ) | End<br>( <i>A. mantzorum</i> ) | Start<br>( <i>A. lifanensis</i> ) | End<br>( <i>A. lifanensis</i> ) |
|--------------------------------------------------|--------------------------------------|--------------|-----------|----------|----------------------------------|--------------------------------|-----------------------------------|---------------------------------|
| 240963                                           | 141660                               | 97.987       | 3.16E-133 | 481      | 1                                | 298                            | 298                               | 1                               |
| 305583                                           | 1731893                              | 98.322       | 6.8E-135  | 486      | 1                                | 298                            | 298                               | 1                               |
| 328452                                           | 913415                               | 97.651       | 1.47E-131 | 475      | 1                                | 298                            | 298                               | 1                               |
| 337208                                           | 1736778                              | 81.373       | 4.4E-62   | 244      | 1                                | 291                            | 298                               | 1                               |
| 650096                                           | 2184090                              | 95.973       | 3.21E-123 | 448      | 1                                | 298                            | 298                               | 1                               |

**Table S29. Homologous sequences of sex-linked loci of *A. mantzorum* in *A. loloensis* data set**

| Sex-linked markers ID<br>( <i>A. mantzorum</i> ) | Locus ID<br>( <i>A.loloensis</i> ) | Identical(%) | Evalue    | Bitscore | Start<br>( <i>A. mantzorum</i> ) | End<br>( <i>A. mantzorum</i> ) | Start<br>( <i>A. loloensis</i> ) | End<br>( <i>A. loloensis</i> ) |
|--------------------------------------------------|------------------------------------|--------------|-----------|----------|----------------------------------|--------------------------------|----------------------------------|--------------------------------|
| 240963                                           | 1185812                            | 94.295       | 4.62E-115 | 420      | 1                                | 298                            | 1                                | 298                            |
| 305583                                           | 448335                             | 98.993       | 2.07E-138 | 497      | 1                                | 298                            | 298                              | 1                              |
| 328452                                           | 729770                             | 98.322       | 4.49E-135 | 486      | 1                                | 298                            | 298                              | 1                              |
| 337208                                           | 709131                             | 92.953       | 1.24E-120 | 438      | 1                                | 291                            | 1                                | 298                            |
| 650096                                           | 193647                             | 97.987       | 2.09E-133 | 481      | 1                                | 298                            | 1                                | 298                            |

**Table S30. Homologous sequences of sex-linked loci of *A. mantzorum* in *A. tuberodepressus* data set**

| Sex-linked markers ID<br>( <i>A. mantzorum</i> ) | Locus ID<br>( <i>A.tuberodepressus</i> ) | Identical(%) | Evalue    | Bitscore | Start<br>( <i>A. mantzorum</i> ) | End<br>( <i>A. mantzorum</i> ) | Start<br>( <i>A. tuberodepressus</i> ) | End<br>( <i>A. tuberodepressus</i> ) |
|--------------------------------------------------|------------------------------------------|--------------|-----------|----------|----------------------------------|--------------------------------|----------------------------------------|--------------------------------------|
| 240963                                           | 392846                                   | 97.651       | 2.15E-131 | 475      | 1                                | 298                            | 298                                    | 1                                    |
| 305583                                           | 1295488                                  | 99.329       | 9.85E-140 | 503      | 1                                | 298                            | 298                                    | 1                                    |
| 328452                                           | 890034                                   | 97.987       | 4.62E-133 | 481      | 1                                | 298                            | 1                                      | 298                                  |
| 337208                                           | 1589583                                  | 94.966       | 2.71E-130 | 472      | 1                                | 291                            | 298                                    | 1                                    |
| 650096                                           | 1198691                                  | 95.333       | 1.01E-119 | 436      | 1                                | 298                            | 1                                      | 298                                  |



**Table S31. Homologous sequences of sex-linked loci of *A. sp.* in *A. chunganensis* data set**

| Sex-linked markers ID<br>( <i>A. sp.</i> ) | Locus ID<br>( <i>A. chunganensis</i> ) | Identical(%) | Evalue    | Bitscore | Start<br>( <i>A. sp.</i> ) | End<br>( <i>A. sp.</i> ) | Start<br>( <i>A. chunganensis</i> ) | End<br>( <i>A. chunganensis</i> ) |
|--------------------------------------------|----------------------------------------|--------------|-----------|----------|----------------------------|--------------------------|-------------------------------------|-----------------------------------|
| 46910                                      | 2443439                                | 90.429       | 4.39E-103 | 381      | 1                          | 298                      | 298                                 | 1                                 |
| 208821                                     | 3743191                                | 91.946       | 9.24E-120 | 436      | 1                          | 298                      | 1                                   | 298                               |
| 271488                                     | 771649                                 | 94.983       | 4.3E-118  | 431      | 1                          | 298                      | 298                                 | 1                                 |
| 1042367                                    | 4855160                                | 94.098       | 1.2E-118  | 433      | 1                          | 298                      | 299                                 | 1                                 |
| 1413441                                    | 5846814                                | 91.154       | 4.6E-98   | 364      | 1                          | 251                      | 1                                   | 260                               |

**Table S32. Homologous sequences of sex-linked loci of *A. sp.* in *A. jinjiangensis* data set**

| Sex-linked markers ID<br>( <i>A. sp.</i> ) | Locus ID<br>( <i>A. jinjiangensis</i> ) | Identical(%) | Evalue    | Bitscore | Start<br>( <i>A. sp.</i> ) | End<br>( <i>A. sp.</i> ) | Start<br>( <i>A. jinjiangensis</i> ) | End<br>( <i>A. jinjiangensis</i> ) |
|--------------------------------------------|-----------------------------------------|--------------|-----------|----------|----------------------------|--------------------------|--------------------------------------|------------------------------------|
| 46910                                      | 326494                                  | 95.05        | 2.69E-118 | 431      | 1                          | 298                      | 1                                    | 298                                |
| 208821                                     | 1780957                                 | 98.997       | 2.61E-138 | 497      | 1                          | 298                      | 1                                    | 298                                |
| 271488                                     | 396443                                  | 99.329       | 5.61E-140 | 503      | 1                          | 298                      | 1                                    | 298                                |
| 1042367                                    | 1090232                                 | 96.644       | 2.63E-133 | 481      | 1                          | 298                      | 298                                  | 1                                  |
| 1413441                                    | 874094                                  | 92.459       | 1.29E-121 | 442      | 1                          | 296                      | 1                                    | 305                                |

**Table S33. Homologous sequences of sex-linked loci of *A. sp.* in *A. lifanensis* data set**

| Sex-linked markers ID<br>( <i>A. sp.</i> ) | Locus ID<br>( <i>A. lifanensis</i> ) | Identical(%) | Evalue    | Bitscore | Start<br>( <i>A. sp.</i> ) | End<br>( <i>A. sp.</i> ) | Start<br>( <i>A. lifanensis</i> ) | End<br>( <i>A. lifanensis</i> ) |
|--------------------------------------------|--------------------------------------|--------------|-----------|----------|----------------------------|--------------------------|-----------------------------------|---------------------------------|
| 46910                                      | 2580114                              | 88.321       | 1.59E-76  | 292      | 4                          | 277                      | 8                                 | 274                             |
| 208821                                     | 857095                               | 95.638       | 1.49E-121 | 442      | 1                          | 298                      | 298                               | 1                               |
| 271488                                     | 1607484                              | 92.81        | 4.24E-107 | 394      | 1                          | 296                      | 298                               | 2                               |
| 1042367                                    | 733364                               | 95.667       | 1.15E-127 | 462      | 1                          | 297                      | 297                               | 1                               |
| 1413441                                    | 3411267                              | 91.586       | 4.32E-122 | 444      | 1                          | 300                      | 1                                 | 309                             |

**Table S34. Homologous sequences of sex-linked loci of *A. sp.* in *A. loloensis* data set**

| Sex-linked markers ID<br>( <i>A. sp.</i> ) | Locus ID<br>( <i>A. loloensis</i> ) | Identical(%) | Evalue    | Bitscore | Start<br>( <i>A. sp.</i> ) | End<br>( <i>A. sp.</i> ) | Start<br>( <i>A. loloensis</i> ) | End<br>( <i>A. loloensis</i> ) |
|--------------------------------------------|-------------------------------------|--------------|-----------|----------|----------------------------|--------------------------|----------------------------------|--------------------------------|
| 46910                                      | 1869549                             | 94.389       | 4.62E-115 | 420      | 1                          | 298                      | 298                              | 1                              |
| 208821                                     | 533871                              | 97.342       | 5.8E-134  | 483      | 1                          | 298                      | 1                                | 300                            |
| 271488                                     | 920489                              | 98.993       | 2.07E-138 | 497      | 1                          | 298                      | 1                                | 298                            |
| 1042367                                    | 333574                              | 96.98        | 4.49E-135 | 486      | 1                          | 298                      | 298                              | 1                              |
| 1413441                                    | 1397218                             | 93.115       | 3.64E-126 | 457      | 1                          | 296                      | 1                                | 305                            |

**Table S35. Homologous sequences of sex-linked loci of *A. sp.* in *A. tuberodepressus* data set**

| Sex-linked markers ID<br>( <i>A. sp.</i> ) | Locus ID<br>( <i>A. tuberodepressus</i> ) | Identical(%) | Evalue    | Bitscore | Start<br>( <i>A. sp.</i> ) | End<br>( <i>A. sp.</i> ) | Start<br>( <i>A. tuberodepressus</i> ) | End<br>( <i>A. tuberodepressus</i> ) |
|--------------------------------------------|-------------------------------------------|--------------|-----------|----------|----------------------------|--------------------------|----------------------------------------|--------------------------------------|
| 46910                                      | 1903916                                   | 88.321       | 2.32E-76  | 292      | 4                          | 277                      | 8                                      | 274                                  |
| 208821                                     | 5191929                                   | 95.973       | 4.68E-123 | 448      | 1                          | 298                      | 298                                    | 1                                    |
| 271488                                     | 497483                                    | 98.322       | 9.92E-135 | 486      | 1                          | 298                      | 298                                    | 1                                    |
| 1042367                                    | 2260144                                   | 93.023       | 1.02E-114 | 420      | 1                          | 298                      | 1                                      | 298                                  |
| 1413441                                    | 2727                                      | 93.443       | 1.74E-127 | 462      | 1                          | 296                      | 1                                      | 305                                  |

**Table S36. Homologous sequences of sex-linked loci of *A. sp.* in *A. xindugiao* data set**

| Sex-linked markers ID<br>( <i>A. sp.</i> ) | Locus ID<br>( <i>A. xindugiao</i> ) | Identical(%) | Evalue    | Bitscore | Start<br>( <i>A. sp.</i> ) | End<br>( <i>A. sp.</i> ) | Start<br>( <i>A. xindugiao</i> ) | End<br>( <i>A. xindugiao</i> ) |
|--------------------------------------------|-------------------------------------|--------------|-----------|----------|----------------------------|--------------------------|----------------------------------|--------------------------------|
| 46910                                      | 1650563                             | 99.664       | 2.43E-141 | 508      | 1                          | 298                      | 298                              | 1                              |
| 208821                                     | 1672060                             | 96.309       | 1.15E-124 | 453      | 1                          | 298                      | 1                                | 298                            |
| 271488                                     | 6970501                             | 99.664       | 2.43E-141 | 508      | 1                          | 298                      | 298                              | 1                              |
| 1042367                                    | 6937050                             | 98.322       | 2.43E-141 | 508      | 1                          | 298                      | 298                              | 1                              |
| 1413441                                    | 812136                              | 91.532       | 4.5E-94   | 351      | 1                          | 239                      | 1                                | 248                            |

**Table S37. Homologous sequences of sex-linked loci of *A. tuberodepressus* in *A. chunganensis* data set**

| Sex-linked markers ID<br>( <i>A. tuberodepressus</i> ) | Locus ID<br>( <i>A. chunganensis</i> ) | Identical(%) | Evalue    | Bitscore | Start<br>( <i>A. tuberodepressus</i> ) | End<br>( <i>A. tuberodepressus</i> ) | Start<br>( <i>A. chunganensis</i> ) | End<br>( <i>A. chunganensis</i> ) |
|--------------------------------------------------------|----------------------------------------|--------------|-----------|----------|----------------------------------------|--------------------------------------|-------------------------------------|-----------------------------------|
| 312165                                                 | 1019332                                | 98.188       | 1.07E-133 | 483      | 1                                      | 276                                  | 1                                   | 276                               |
| 657724                                                 | 2450248                                | 94.631       | 2E-116    | 425      | 1                                      | 298                                  | 298                                 | 1                                 |
| 934386                                                 | 2136270                                | 97.015       | 3.17E-124 | 451      | 1                                      | 268                                  | 268                                 | 1                                 |
| 1219551                                                | 2042381                                | 94.966       | 4.3E-118  | 431      | 1                                      | 298                                  | 298                                 | 1                                 |
| 2024518                                                | 500922                                 | 97.651       | 1.96E-131 | 475      | 1                                      | 298                                  | 298                                 | 1                                 |

**Table S38. Homologous sequences of sex-linked loci of *A. tuberodepressus* in *A. jinjiangensis* data set**

| Sex-linked markers ID<br>( <i>A. tuberodepressus</i> ) | Locus ID<br>( <i>A. jinjiangensis</i> ) | Identical(%) | Evalue    | Bitscore | Start<br>( <i>A. tuberodepressus</i> ) | End<br>( <i>A. tuberodepressus</i> ) | Start<br>( <i>A. jinjiangensis</i> ) | End<br>( <i>A. jinjiangensis</i> ) |
|--------------------------------------------------------|-----------------------------------------|--------------|-----------|----------|----------------------------------------|--------------------------------------|--------------------------------------|------------------------------------|
| 312165                                                 | 2667252                                 | 88.53        | 1.99E-89  | 335      | 1                                      | 276                                  | 279                                  | 1                                  |
| 657724                                                 | 1416118                                 | 98.658       | 1.21E-136 | 492      | 1                                      | 298                                  | 298                                  | 1                                  |
| 934386                                                 | 3160316                                 | 98.881       | 9.07E-133 | 479      | 1                                      | 268                                  | 1                                    | 268                                |
| 1219551                                                | 601217                                  | 99.664       | 1.21E-141 | 508      | 1                                      | 298                                  | 1                                    | 298                                |
| 2024518                                                | 1832768                                 | 97.987       | 2.63E-133 | 481      | 1                                      | 298                                  | 1                                    | 298                                |

**Table S39. Homologous sequences of sex-linked loci of *A. tuberodepressus* in *A. lifanensis* data set**

| Sex-linked markers ID<br>( <i>A. tuberodepressus</i> ) | Locus ID<br>( <i>A. lifanensis</i> ) | Identical(%) | Evalue    | Bitscore | Start<br>( <i>A. tuberodepressus</i> ) | End<br>( <i>A. tuberodepressus</i> ) | Start<br>( <i>A. lifanensis</i> ) | End<br>( <i>A. lifanensis</i> ) |
|--------------------------------------------------------|--------------------------------------|--------------|-----------|----------|----------------------------------------|--------------------------------------|-----------------------------------|---------------------------------|
| 312165                                                 | 1071496                              | 98.188       | 2.24E-134 | 484      | 1                                      | 276                                  | 1                                 | 276                             |
| 657724                                                 | 2235918                              | 87.625       | 9.31E-94  | 350      | 1                                      | 298                                  | 1                                 | 283                             |
| 934386                                                 | 224516                               | 97.388       | 1.42E-126 | 459      | 1                                      | 268                                  | 1                                 | 268                             |
| 1219551                                                | 516332                               | 98.322       | 6.8E-135  | 486      | 1                                      | 298                                  | 298                               | 1                               |
| 2024518                                                | 2740849                              | 98.322       | 6.8E-135  | 486      | 1                                      | 298                                  | 298                               | 1                               |

**Table S40. Homologous sequences of sex-linked loci of *A. tuberodepressus* in *A. mantzorum* data set**

| Sex-linked markers ID<br>( <i>A. tuberodepressus</i> ) | Locus ID<br>( <i>A. mantzorum</i> ) | Identical(%) | Evalue    | Bitscore | Start<br>( <i>A. tuberodepressus</i> ) | End<br>( <i>A. tuberodepressus</i> ) | Start<br>( <i>A. mantzorum</i> ) | End<br>( <i>A. mantzorum</i> ) |
|--------------------------------------------------------|-------------------------------------|--------------|-----------|----------|----------------------------------------|--------------------------------------|----------------------------------|--------------------------------|
| 312165                                                 | 725638                              | 89.105       | 1.88E-82  | 313      | 1                                      | 257                                  | 1                                | 255                            |
| 657724                                                 | 13714                               | 82.623       | 7.4E-72   | 278      | 9                                      | 298                                  | 300                              | 1                              |
| 934386                                                 | 841481                              | 99.115       | 8.68E-111 | 407      | 1                                      | 226                                  | 1                                | 226                            |
| 1219551                                                | 1864040                             | 91.852       | 3.57E-45  | 189      | 158                                    | 292                                  | 158                              | 292                            |
| 2024518                                                | 808415                              | 98.658       | 2.43E-136 | 492      | 1                                      | 298                                  | 298                              | 1                              |

**Table S41. Homologous sequences of sex-linked loci of *A. tuberodepressus* in *A. sp.* data set**

| Sex-linked markers ID<br>( <i>A. tuberodepressus</i> ) | Locus ID<br>( <i>A. sp.</i> ) | Identical(%) | Evalue    | Bitscore | Start<br>( <i>A. tuberodepressus</i> ) | End<br>( <i>A. tuberodepressus</i> ) | Start<br>( <i>A. sp.</i> ) | End<br>( <i>A. sp.</i> ) |
|--------------------------------------------------------|-------------------------------|--------------|-----------|----------|----------------------------------------|--------------------------------------|----------------------------|--------------------------|
| 312165                                                 | 1394266                       | 87.097       | 2.31E-82  | 311      | 4                                      | 276                                  | 279                        | 1                        |
| 657724                                                 | 635208                        | 97.651       | 8.42E-132 | 475      | 1                                      | 298                                  | 298                        | 1                        |
| 934386                                                 | 2610769                       | 99.254       | 1.34E-134 | 484      | 1                                      | 268                                  | 1                          | 268                      |
| 1219551                                                | 797023                        | 99.329       | 3.86E-140 | 503      | 1                                      | 298                                  | 298                        | 1                        |
| 2024518                                                | 2169423                       | 97.987       | 1.81E-133 | 481      | 1                                      | 298                                  | 1                          | 298                      |

**Table S42. Homologous sequences of sex-linked loci of *A. tuberodepressus* in *A. xinduoqiao* data set**

| Sex-linked markers ID<br>( <i>A. tuberodepressus</i> ) | Locus ID<br>( <i>A. xinduoqiao</i> ) | Identical(%) | Evalue    | Bitscore | Start<br>( <i>A. tuberodepressus</i> ) | End<br>( <i>A. tuberodepressus</i> ) | Start<br>( <i>A. xinduoqiao</i> ) | End<br>( <i>A. xinduoqiao</i> ) |
|--------------------------------------------------------|--------------------------------------|--------------|-----------|----------|----------------------------------------|--------------------------------------|-----------------------------------|---------------------------------|
| 312165                                                 | 5851835                              | 98.913       | 6.28E-137 | 494      | 1                                      | 276                                  | 1                                 | 276                             |
| 657724                                                 | 818188                               | 97.651       | 2.46E-131 | 475      | 1                                      | 298                                  | 1                                 | 298                             |
| 934386                                                 | 2692607                              | 99.115       | 8.73E-111 | 407      | 1                                      | 226                                  | 1                                 | 226                             |
| 1219551                                                | 687541                               | 99.329       | 1.13E-139 | 503      | 1                                      | 298                                  | 298                               | 1                               |
| 2024518                                                | 3105988                              | 98.322       | 1.14E-134 | 486      | 1                                      | 298                                  | 298                               | 1                               |

**Table S43. Homologous sequences of sex-linked loci of *A. wuyiensis* in *A. chunganensis* data set**

| Sex-linked markers ID<br>( <i>A. wuyiensis</i> ) | Locus ID<br>( <i>A. wuyiensis</i> ) | Identical(%) | Evalue    | Bitscore | Start<br>( <i>A. wuyiensis</i> ) | End<br>( <i>A. wuyiensis</i> ) | Start<br>( <i>A. chunganensis</i> ) | End<br>( <i>A. chunganensis</i> ) |
|--------------------------------------------------|-------------------------------------|--------------|-----------|----------|----------------------------------|--------------------------------|-------------------------------------|-----------------------------------|
| 201111                                           | 464239                              | 92.787       | 1.22E-108 | 399      | 1                                | 300                            | 1                                   | 298                               |
| 312243                                           | 1013678                             | 89.333       | 3.62E-89  | 335      | 1                                | 297                            | 1                                   | 297                               |
| 321845                                           | 1501634                             | 90.333       | 9.58E-95  | 353      | 1                                | 298                            | 298                                 | 1                                 |
| 427217                                           | 1616476                             | 86.897       | 4.55E-78  | 298      | 10                               | 298                            | 37                                  | 298                               |
| 1146109                                          | 618153                              | 93.624       | 2.01E-111 | 409      | 1                                | 298                            | 1                                   | 298                               |

**Table S44. Homologous sequences of sex-linked loci of *A. wuyiensis* in *A. jinjiangensis* data set**

| Sex-linked markers ID<br>( <i>A. wuyiensis</i> ) | Locus ID<br>( <i>A. jinjiangensis</i> ) | Identical(%) | Evalue    | Bitscore | Start<br>( <i>A. wuyiensis</i> ) | End<br>( <i>A. wuyiensis</i> ) | Start<br>( <i>A. jinjiangensis</i> ) | End<br>( <i>A. jinjiangensis</i> ) |
|--------------------------------------------------|-----------------------------------------|--------------|-----------|----------|----------------------------------|--------------------------------|--------------------------------------|------------------------------------|
| 201111                                           | 558847                                  | 94.352       | 3.5E-117  | 427      | 1                                | 300                            | 1                                    | 298                                |
| 312243                                           | 1075099                                 | 92.256       | 2.22E-104 | 385      | 1                                | 297                            | 1                                    | 297                                |
| 321845                                           | 741431                                  | 90.604       | 1.29E-96  | 359      | 1                                | 298                            | 1                                    | 298                                |
| 427217                                           | 1119478                                 | 96.528       | 1.75E-60  | 239      | 155                              | 298                            | 144                                  | 1                                  |
| 1146109                                          | 39416                                   | 93.289       | 1.63E-110 | 405      | 1                                | 298                            | 1                                    | 298                                |

**Table S45. Homologous sequences of sex-linked loci of *A. wuyiensis* in *A. lifanensis* data set**

| Sex-linked markers ID<br>( <i>A. wuyiensis</i> ) | Locus ID<br>( <i>A. lifanensis</i> ) | Identical(%) | Evalue    | Bitscore | Start<br>( <i>A. wuyiensis</i> ) | End<br>( <i>A. wuyiensis</i> ) | Start<br>( <i>A. lifanensis</i> ) | End<br>( <i>A. lifanensis</i> ) |
|--------------------------------------------------|--------------------------------------|--------------|-----------|----------|----------------------------------|--------------------------------|-----------------------------------|---------------------------------|
| 201111                                           | 709558                               | 93.729       | 9.12E-114 | 416      | 1                                | 300                            | 1                                 | 298                             |
| 312243                                           | 767578                               | 86.452       | 3.5E-93   | 348      | 1                                | 310                            | 1                                 | 298                             |
| 321845                                           | 2009742                              | 90.604       | 1.55E-96  | 359      | 1                                | 298                            | 1                                 | 298                             |
| 427217                                           | 2474073                              | 95.833       | 9.78E-59  | 233      | 155                              | 298                            | 144                               | 1                               |
| 1146109                                          | 1132330                              | 92.953       | 3.28E-108 | 398      | 1                                | 298                            | 1                                 | 298                             |

**Table S46. Homologous sequences of sex-linked loci of *A. wuyiensis* in *A. loloensis* data set**

| Sex-linked markers ID<br>( <i>A. wuyiensis</i> ) | Locus ID<br>( <i>A. loloensis</i> ) | Identical(%) | Evalue    | Bitscore | Start<br>( <i>A. wuyiensis</i> ) | End<br>( <i>A. wuyiensis</i> ) | Start<br>( <i>A. loloensis</i> ) | End<br>( <i>A. loloensis</i> ) |
|--------------------------------------------------|-------------------------------------|--------------|-----------|----------|----------------------------------|--------------------------------|----------------------------------|--------------------------------|
| 201111                                           | 768012                              | 93.115       | 7.78E-113 | 412      | 1                                | 300                            | 304                              | 1                              |
| 312243                                           | 432114                              | 85.161       | 1.07E-86  | 326      | 1                                | 310                            | 1                                | 298                            |
| 321845                                           | 68653                               | 90.268       | 4.75E-95  | 353      | 1                                | 298                            | 1                                | 298                            |
| 427217                                           | 1025827                             | 96.528       | 1.39E-60  | 239      | 155                              | 298                            | 155                              | 298                            |
| 1146109                                          | 1354235                             | 92.953       | 2.16E-108 | 398      | 1                                | 298                            | 1                                | 298                            |



**Table S47. Homologous sequences of sex-linked loci of *A. wuyiensis* in *A. mantzorum* data set**

| Sex-linked markers ID<br>( <i>A. wuyiensis</i> ) | Locus ID<br>( <i>A. mantzorum</i> ) | Identical(%) | Evalue    | Bitscore | Start<br>( <i>A. wuyiensis</i> ) | End<br>( <i>A. wuyiensis</i> ) | Start<br>( <i>A. mantzorum</i> ) | End<br>( <i>A. mantzorum</i> ) |
|--------------------------------------------------|-------------------------------------|--------------|-----------|----------|----------------------------------|--------------------------------|----------------------------------|--------------------------------|
| 201111                                           | 390044                              | 90.365       | 1.18E-109 | 403      | 1                                | 300                            | 1                                | 293                            |
| 312243                                           | -                                   | -            | -         | -        | -                                | -                              | -                                | -                              |
| 321845                                           | 3388689                             | 87.919       | 5.64E-83  | 315      | 1                                | 298                            | 1                                | 298                            |
| 427217                                           | 2394765                             | 96.528       | 3.49E-60  | 239      | 155                              | 298                            | 144                              | 1                              |
| 1146109                                          | 2063369                             | 92.953       | 5.45E-108 | 398      | 1                                | 298                            | 1                                | 298                            |

**Table S48. Homologous sequences of sex-linked loci of *A. wuyiensis* in *A. sp.* data set**

| Sex-linked markers ID<br>( <i>A. wuyiensis</i> ) | Locus ID<br>( <i>A. sp.</i> ) | Identical(%) | Evalue    | Bitscore | Start<br>( <i>A. wuyiensis</i> ) | End<br>( <i>A. wuyiensis</i> ) | Start<br>( <i>A. sp.</i> ) | End<br>( <i>A. sp.</i> ) |
|--------------------------------------------------|-------------------------------|--------------|-----------|----------|----------------------------------|--------------------------------|----------------------------|--------------------------|
| 201111                                           | 427621                        | 87.324       | 3.32E-71  | 274      | 32                               | 300                            | 276                        | 1                        |
| 312243                                           | -                             | -            | -         | -        | -                                | -                              | -                          | -                        |
| 321845                                           | 935352                        | 89.933       | 1.91E-93  | 348      | 1                                | 298                            | 1                          | 298                      |
| 427217                                           | 427217                        | 96.528       | 1.2E-60   | 239      | 155                              | 298                            | 155                        | 298                      |
| 1146109                                          | 1928913                       | 92.953       | 1.87E-108 | 398      | 1                                | 298                            | 1                          | 298                      |

**Table S49. Homologous sequences of sex-linked loci of *A. wuyiensis* in *A. tuberodepressus* data set**

| Sex-linked markers ID<br>( <i>A. wuyiensis</i> ) | Locus ID<br>( <i>A. tuberodepressus</i> ) | Identical(%) | Evalue    | Bitscore | Start<br>( <i>A. wuyiensis</i> ) | End<br>( <i>A. wuyiensis</i> ) | Start<br>( <i>A. tuberodepressus</i> ) | End<br>( <i>A. tuberodepressus</i> ) |
|--------------------------------------------------|-------------------------------------------|--------------|-----------|----------|----------------------------------|--------------------------------|----------------------------------------|--------------------------------------|
| 201111                                           | 1956200                                   | 94.684       | 1.32E-118 | 433      | 1                                | 300                            | 298                                    | 1                                    |
| 312243                                           | 1215977                                   | 85.531       | 1.42E-93  | 350      | 1                                | 310                            | 1                                      | 307                                  |
| 321845                                           | 1782183                                   | 90.604       | 2.26E-96  | 359      | 1                                | 298                            | 1                                      | 298                                  |
| 427217                                           | 1114290                                   | 95.833       | 1.43E-58  | 233      | 155                              | 298                            | 144                                    | 1                                    |
| 1146109                                          | 519872                                    | 93.289       | 1.03E-109 | 403      | 1                                | 298                            | 298                                    | 1                                    |

**Table S50. Homologous sequences of sex-linked loci of *A. wuyiensis* in *A. xindugiao* data set**

| Sex-linked markers ID<br>( <i>A. wuyiensis</i> ) | Locus ID<br>( <i>A. xindugiao</i> ) | Identical(%) | Evalue    | Bitscore | Start<br>( <i>A. wuyiensis</i> ) | End<br>( <i>A. wuyiensis</i> ) | Start<br>( <i>A. xindugiao</i> ) | End<br>( <i>A. xindugiao</i> ) |
|--------------------------------------------------|-------------------------------------|--------------|-----------|----------|----------------------------------|--------------------------------|----------------------------------|--------------------------------|
| 201111                                           | 1122249                             | 91.803       | 4.3E-104  | 385      | 1                                | 300                            | 298                              | 1                              |
| 312243                                           | -                                   | -            | -         | -        | -                                | -                              | -                                | -                              |
| 321845                                           | 3322531                             | 90.268       | 1.2E-94   | 353      | 1                                | 298                            | 1                                | 298                            |
| 427217                                           | 4100399                             | 96.528       | 3.51E-60  | 239      | 155                              | 298                            | 155                              | 298                            |
| 1146109                                          | 291437                              | 92.617       | 1.52E-108 | 399      | 1                                | 298                            | 1                                | 298                            |

**Table S51. Homologous sequences of sex-linked loci of *A. xinduqiao* in *A. chunganensis* data set**

| Sex-linked markers ID<br>( <i>A. xinduqiao</i> ) | Locus ID<br>( <i>A. chunganensis</i> ) | Identical(%) | Evalue    | Bitscore | Start<br>( <i>A. xinduqiao</i> ) | End<br>( <i>A. xinduqiao</i> ) | Start<br>( <i>A. chunganensis</i> ) | End<br>( <i>A. chunganensis</i> ) |
|--------------------------------------------------|----------------------------------------|--------------|-----------|----------|----------------------------------|--------------------------------|-------------------------------------|-----------------------------------|
| 376827                                           | 1863739                                | 97.651       | 1.96E-131 | 475      | 1                                | 298                            | 1                                   | 298                               |
| 942805                                           | 114383                                 | 96.98        | 4.24E-128 | 464      | 1                                | 298                            | 1                                   | 298                               |
| 946761                                           | 207420                                 | 91.129       | 3.72E-39  | 169      | 1                                | 124                            | 1                                   | 124                               |
| 1829008                                          | 1784981                                | 91.275       | 7.35E-101 | 374      | 6                                | 298                            | 4                                   | 298                               |
| 2190627                                          | 1354952                                | 92.453       | 2.62E-105 | 388      | 1                                | 265                            | 281                                 | 23                                |

**Table S52. Homologous sequences of sex-linked loci of *A. xinduqiao* in *A. jinjiangensis* data set**

| Sex-linked markers ID<br>( <i>A. xinduqiao</i> ) | Locus ID<br>( <i>A. jinjiangensis</i> ) | Identical(%) | Evalue    | Bitscore | Start<br>( <i>A. xinduqiao</i> ) | End<br>( <i>A. xinduqiao</i> ) | Start<br>( <i>A. jinjiangensis</i> ) | End<br>( <i>A. jinjiangensis</i> ) |
|--------------------------------------------------|-----------------------------------------|--------------|-----------|----------|----------------------------------|--------------------------------|--------------------------------------|------------------------------------|
| 376827                                           | 590117                                  | 99.329       | 5.61E-140 | 503      | 1                                | 298                            | 1                                    | 298                                |
| 942805                                           | 796025                                  | 98.658       | 1.21E-136 | 492      | 1                                | 298                            | 1                                    | 298                                |
| 946761                                           | 676133                                  | 98.993       | 7.26E-139 | 499      | 1                                | 298                            | 298                                  | 1                                  |
| 1829008                                          | 585141                                  | 99.329       | 5.61E-140 | 503      | 1                                | 298                            | 1                                    | 298                                |
| 2190627                                          | 859953                                  | 97.987       | 2.63E-133 | 481      | 1                                | 298                            | 1                                    | 298                                |

**Table S53. Homologous sequences of sex-linked loci of *A. xinduoqiao* in *A. lifanensis* data set**

| Sex-linked markers ID<br>( <i>A. xinduoqiao</i> ) | Locus ID<br>( <i>A. lifanensis</i> ) | Identical(%) | Evalue    | Bitscore | Start<br>( <i>A. xinduoqiao</i> ) | End<br>( <i>A. xinduoqiao</i> ) | Start<br>( <i>A. lifanensis</i> ) | End<br>( <i>A. lifanensis</i> ) |
|---------------------------------------------------|--------------------------------------|--------------|-----------|----------|-----------------------------------|---------------------------------|-----------------------------------|---------------------------------|
| 376827                                            | 2182817                              | 98.322       | 6.8E-135  | 486      | 1                                 | 298                             | 1                                 | 298                             |
| 942805                                            | 1677637                              | 97.993       | 3.16E-133 | 481      | 1                                 | 298                             | 298                               | 1                               |
| 946761                                            | 2271294                              | 98.322       | 1.89E-135 | 488      | 1                                 | 298                             | 1                                 | 298                             |
| 1829008                                           | 557050                               | 97.315       | 1.9E-130  | 472      | 1                                 | 298                             | 298                               | 1                               |
| 2190627                                           | 603800                               | 97.324       | 6.85E-130 | 470      | 1                                 | 298                             | 1                                 | 298                             |

**Table S54. Homologous sequences of sex-linked loci of *A. xinduoqiao* in *A. loloensis* data set**

| Sex-linked markers ID<br>( <i>A. xinduoqiao</i> ) | Locus ID<br>( <i>A. loloensis</i> ) | Identical(%) | Evalue    | Bitscore | Start<br>( <i>A. xinduoqiao</i> ) | End<br>( <i>A. xinduoqiao</i> ) | Start<br>( <i>A. loloensis</i> ) | End<br>( <i>A. loloensis</i> ) |
|---------------------------------------------------|-------------------------------------|--------------|-----------|----------|-----------------------------------|---------------------------------|----------------------------------|--------------------------------|
| 376827                                            | 221452                              | 98.658       | 9.65E-137 | 492      | 1                                 | 298                             | 298                              | 1                              |
| 942805                                            | 1133695                             | 99.664       | 9.58E-142 | 508      | 1                                 | 298                             | 298                              | 1                              |
| 946761                                            | 540727                              | 99.329       | 1.24E-140 | 505      | 1                                 | 298                             | 298                              | 1                              |
| 1829008                                           | 911422                              | 98.993       | 2.07E-138 | 497      | 1                                 | 298                             | 298                              | 1                              |
| 2190627                                           | 1168692                             | 98.993       | 2.07E-138 | 497      | 1                                 | 298                             | 298                              | 1                              |

**Table S55. Homologous sequences of sex-linked loci of *A. xinduoqiao* in *A. tuberodepressus* data set**

| Sex-linked markers ID<br>( <i>A. xinduoqiao</i> ) | Locus ID<br>( <i>A. tuberodepressus</i> ) | Identical(%) | Evalue    | Bitscore | Start<br>( <i>A. xinduoqiao</i> ) | End<br>( <i>A. xinduoqiao</i> ) | Start<br>( <i>A. tuberodepressus</i> ) | End<br>( <i>A. tuberodepressus</i> ) |
|---------------------------------------------------|-------------------------------------------|--------------|-----------|----------|-----------------------------------|---------------------------------|----------------------------------------|--------------------------------------|
| 376827                                            | 1376827                                   | 98.881       | 1.47E-132 | 479      | 1                                 | 268                             | 268                                    | 1                                    |
| 942805                                            | 869719                                    | 99.329       | 9.85E-140 | 503      | 1                                 | 298                             | 298                                    | 1                                    |
| 946761                                            | 2074006                                   | 98.993       | 1.27E-138 | 499      | 1                                 | 298                             | 298                                    | 1                                    |
| 1829008                                           | 2562629                                   | 98.993       | 4.58E-138 | 497      | 1                                 | 298                             | 1                                      | 298                                  |
| 2190627                                           | 1612836                                   | 99.329       | 9.85E-140 | 503      | 1                                 | 298                             | 298                                    | 1                                    |
