# Supplementary material for: Heterogeneous Evolution of Sex Chromosomes in the Torrent Frog Genus Amolops
Source: MDPI journal article supplement (doi:10.3390/ijms231911146), 2022-09-22
Supplement: s1 [file s1]

## File S6

The results of *blastn* alignment between the confirmed sex-linked loci of *Amolops* (*A. chunganensis*, *A. jinjiangensis*, *A. lifanensis*, *A. loloensis*, *A. mantzorum*, *A. sp.*, *A. tuberodepressus*, *A. wuyiensis*, *A. xinduoqiao* ) and the Y chromosome of *A. mantzorum*. “start” and ‘end’ indicate the nucleotide position.

**Table S1. The results of *blastn* alignment between the confirmed sex-linked loci of *A. chunganensis* and the Y chromosome of *A. mantzorum***

| Sex-linked markers ID<br>( <i>A. chunganensis</i> ) | Y chromosome ID | Identical(%) | Evalue    | Bitscore | Start<br>( <i>A. chunganensis</i> ) | End<br>( <i>A. chunganensis</i> ) | Start<br>(Y chromosome) | End<br>(Y chromosome) |
|-----------------------------------------------------|-----------------|--------------|-----------|----------|-------------------------------------|-----------------------------------|-------------------------|-----------------------|
| 23397                                               | 4847706         | 90.688       | 1.64E-88  | 327      | 1                                   | 246                               | 246                     | 1                     |
| 194216                                              | 4653768         | 79.208       | 1.26E-30  | 135      | 87                                  | 287                               | 193                     | 1                     |
| 239118                                              | 5042684         | 91.632       | 2.77E-87  | 324      | 1                                   | 233                               | 123                     | 354                   |
| 244060                                              | 4691324         | 92.208       | 9.39E-22  | 106      | 1                                   | 73                                | 80                      | 4                     |
| 317179                                              | 4951656         | 89.916       | 1.09E-35  | 152      | 73                                  | 189                               | 154                     | 272                   |
| 343083                                              | 4733108         | 90.863       | 1.19E-70  | 268      | 1                                   | 196                               | 192                     | 1                     |
| 388244                                              | 1277224         | 97.917       | 4.3E-65   | 250      | 155                                 | 298                               | 5                       | 148                   |
| 697780                                              | 5071580         | 80.12        | 3.45E-61  | 237      | 1                                   | 306                               | 400                     | 74                    |
| 726405                                              | 4768762         | 91.209       | 2.48E-27  | 124      | 184                                 | 274                               | 235                     | 145                   |
| 788298                                              | 1273427         | 96.35        | 7.25E-58  | 226      | 8                                   | 144                               | 1                       | 137                   |
| 803318                                              | 5051111         | 91.085       | 3.68E-95  | 350      | 12                                  | 269                               | 278                     | 21                    |
| 865634                                              | 4668121         | 89.352       | 1.03E-70  | 268      | 27                                  | 238                               | 218                     | 3                     |
| 938946                                              | 5021552         | 91.549       | 2.05E-48  | 195      | 155                                 | 296                               | 64                      | 203                   |
| 1222271                                             | 4891674         | 95.437       | 3.67E-115 | 416      | 1                                   | 260                               | 262                     | 1                     |
| 1395828                                             | 4629391         | 91.566       | 2.91E-62  | 241      | 164                                 | 329                               | 1                       | 166                   |
| 1496617                                             | 4776381         | 86.818       | 6.3E-63   | 243      | 3                                   | 219                               | 17                      | 235                   |
| 1499023                                             | 4777379         | 86.134       | 4.05E-65  | 250      | 46                                  | 278                               | 2                       | 237                   |
| 1594920                                             | 1500316         | 93.525       | 2.63E-52  | 207      | 6                                   | 144                               | 1                       | 139                   |
| 1777161                                             | 4911526         | 81.356       | 3.25E-31  | 137      | 71                                  | 240                               | 236                     | 60                    |

|         |         |        |           |     |     |     |     |     |
|---------|---------|--------|-----------|-----|-----|-----|-----|-----|
| 2038902 | 3727802 | 87.64  | 3.15E-21  | 104 | 11  | 99  | 34  | 122 |
| 2083719 | 2551300 | 85.507 | 3.4E-51   | 204 | 59  | 265 | 5   | 197 |
| 2189594 | 5001519 | 88.142 | 5.03E-79  | 296 | 26  | 275 | 314 | 65  |
| 2246425 | 5013167 | 91.667 | 1.58E-49  | 198 | 1   | 144 | 296 | 154 |
| 2445832 | 1518668 | 95.266 | 3.94E-70  | 267 | 38  | 206 | 18  | 185 |
| 2461097 | 4827833 | 80.321 | 3.45E-41  | 171 | 1   | 246 | 226 | 2   |
| 2463324 | 5075053 | 87.259 | 1.95E-83  | 311 | 41  | 298 | 42  | 295 |
| 2490984 | 1168837 | 96.19  | 9.58E-42  | 172 | 1   | 105 | 23  | 127 |
| 2607230 | 4920253 | 91.333 | 3.46E-51  | 204 | 155 | 302 | 251 | 102 |
| 2743456 | 4874750 | 94.253 | 4.64E-30  | 134 | 161 | 247 | 148 | 234 |
| 3166758 | 4900362 | 85.876 | 3.45E-41  | 171 | 52  | 225 | 1   | 161 |
| 3217147 | 4753254 | 94.737 | 6.45E-43  | 176 | 1   | 114 | 118 | 230 |
| 3589609 | 5021395 | 97.656 | 1.04E-55  | 219 | 1   | 127 | 243 | 116 |
| 3721673 | 4762650 | 91.406 | 9.2E-42   | 172 | 150 | 277 | 68  | 192 |
| 39171   | 4934951 | 95.139 | 2.02E-58  | 228 | 1   | 144 | 146 | 3   |
| 71696   | 5019902 | 93.254 | 2.91E-101 | 370 | 1   | 252 | 251 | 1   |
| 281026  | 4187937 | 90.598 | 9.65E-37  | 156 | 178 | 294 | 117 | 1   |
| 343847  | 1334159 | 86.826 | 6.67E-43  | 176 | 1   | 155 | 167 | 1   |
| 367209  | 4766533 | 94.366 | 1.21E-55  | 219 | 157 | 298 | 231 | 90  |
| 461783  | 4882667 | 91.096 | 2.05E-48  | 195 | 155 | 297 | 61  | 205 |
| 647984  | 4771414 | 88.889 | 2.06E-43  | 178 | 1   | 144 | 53  | 196 |
| 775866  | 5075936 | 89.964 | 1.07E-95  | 351 | 1   | 279 | 308 | 39  |
| 1799338 | 4820725 | 86.722 | 2.54E-67  | 257 | 20  | 250 | 245 | 7   |
| 2307679 | 4972100 | 91.636 | 3.77E-105 | 383 | 1   | 275 | 275 | 2   |

---

**Table S2. The results of *blastn* alignment between the confirmed sex-linked loci of *A. jinjiangensis* and the Y chromosome of *A. mantzorum***

| Sex-linked markers ID<br>( <i>A. jinjiangensis</i> ) | Y chromosome ID | Identical(%) | Evalue   | Bitscore | Start<br>( <i>A. jinjiangensis</i> ) | End<br>( <i>A. jinjiangensis</i> ) | Start<br>(Y chromosome) | End<br>(Y chromosome) |
|------------------------------------------------------|-----------------|--------------|----------|----------|--------------------------------------|------------------------------------|-------------------------|-----------------------|
| 109618                                               | 4860987         | 93.793       | 4.36E-55 | 217      | 1                                    | 144                                | 30                      | 173                   |
| 204309                                               | 4721776         | 97.744       | 5.67E-59 | 230      | 1                                    | 133                                | 95                      | 227                   |
| 261570                                               | 5073809         | 86.139       | 2.02E-58 | 228      | 7                                    | 207                                | 315                     | 117                   |
| 263214                                               | 4568628         | 91.667       | 4.4E-50  | 200      | 1                                    | 144                                | 21                      | 164                   |
| 361666                                               | 1418531         | 98.611       | 9.25E-67 | 255      | 155                                  | 298                                | 155                     | 12                    |
| 421944                                               | 1266847         | 93.571       | 2.67E-52 | 207      | 95                                   | 231                                | 140                     | 1                     |
| 449150                                               | 4917731         | 91.6         | 2.46E-97 | 357      | 51                                   | 298                                | 1                       | 246                   |
| 458997                                               | 4803217         | 94           | 9.38E-57 | 222      | 1                                    | 144                                | 196                     | 47                    |
| 478746                                               | 4603552         | 96.364       | 1.6E-44  | 182      | 1                                    | 110                                | 38                      | 147                   |
| 483348                                               | 1293126         | 97.692       | 2.61E-57 | 224      | 155                                  | 284                                | 43                      | 172                   |
| 1518147                                              | 4946231         | 85.938       | 4.53E-55 | 217      | 84                                   | 263                                | 67                      | 258                   |
| 32511                                                | 1892343         | 83.766       | 2.63E-32 | 141      | 11                                   | 159                                | 159                     | 7                     |
| 273329                                               | 4858987         | 82.833       | 8.14E-48 | 193      | 63                                   | 280                                | 232                     | 2                     |
| 427939                                               | 5081765         | 94.521       | 9.38E-57 | 222      | 2                                    | 144                                | 834                     | 979                   |
| 700074                                               | 4838829         | 92.941       | 1.41E-64 | 248      | 1                                    | 170                                | 171                     | 2                     |
| 1196026                                              | 3313201         | 92.143       | 4.79E-49 | 196      | 1                                    | 139                                | 175                     | 36                    |
| 26967                                                | 5050277         | 99.005       | 1.23E-98 | 361      | 1                                    | 201                                | 359                     | 159                   |
| 210224                                               | 4799970         | 90.698       | 2.45E-58 | 228      | 100                                  | 270                                | 245                     | 75                    |
| 508443                                               | 4538782         | 99.457       | 1.05E-90 | 335      | 90                                   | 273                                | 12                      | 195                   |

|         |         |        |          |     |     |     |     |     |
|---------|---------|--------|----------|-----|-----|-----|-----|-----|
| 785681  | 5071508 | 84.047 | 3.81E-60 | 233 | 3   | 258 | 109 | 351 |
| 1320445 | 4869987 | 91.304 | 4.72E-55 | 217 | 1   | 159 | 8   | 167 |
| 1690024 | 5028514 | 89.732 | 4.34E-75 | 283 | 85  | 304 | 336 | 113 |
| 2601070 | 4636847 | 95.238 | 4.02E-70 | 267 | 109 | 276 | 168 | 1   |
| 3048173 | 1297365 | 97.794 | 9.92E-61 | 235 | 4   | 139 | 181 | 46  |
| 3081833 | 1349511 | 93.617 | 1.14E-74 | 281 | 42  | 229 | 191 | 4   |
| 3451145 | 4757212 | 94.175 | 2.13E-37 | 158 | 140 | 242 | 192 | 90  |
| 3867224 | 4578511 | 95.89  | 3.87E-61 | 237 | 1   | 146 | 59  | 204 |
| 4557485 | 1518864 | 94.667 | 4.17E-60 | 233 | 139 | 288 | 2   | 151 |
| 8973283 | 1297495 | 95.531 | 1.98E-76 | 287 | 1   | 179 | 3   | 181 |

---

**Table S3. The results of *blastn* alignment between the confirmed sex-linked loci of *A. lifanensis* and the Y chromosome of *A. mantzorum***

| Sex-linked markers ID<br>( <i>A. lifanensis</i> ) | Y chromosome ID | Identical(%) | Evalue   | Bitscore | Start<br>( <i>A. lifanensis</i> ) | End<br>( <i>A. lifanensis</i> ) | Start<br>(Y chromosome) | End<br>(Y chromosome) |
|---------------------------------------------------|-----------------|--------------|----------|----------|-----------------------------------|---------------------------------|-------------------------|-----------------------|
| 3479                                              | 4643523         | 85.922       | 1.35E-55 | 219      | 21                                | 224                             | 206                     | 1                     |
| 128621                                            | 4720454         | 88.596       | 4.24E-75 | 283      | 1                                 | 228                             | 8                       | 228                   |
| 149043                                            | 4946728         | 82.197       | 1.21E-60 | 235      | 1                                 | 252                             | 21                      | 284                   |
| 174627                                            | 1083669         | 97.222       | 4.43E-45 | 183      | 1                                 | 108                             | 1                       | 108                   |
| 345647                                            | 4682439         | 86.364       | 9.52E-57 | 222      | 87                                | 302                             | 1                       | 204                   |
| 409308                                            | 4850610         | 88           | 1.49E-24 | 115      | 1                                 | 97                              | 50                      | 149                   |
| 430733                                            | 4991220         | 85.985       | 4.24E-75 | 283      | 36                                | 295                             | 1                       | 257                   |
| 520205                                            | 4878112         | 84.038       | 1.21E-55 | 219      | 1                                 | 213                             | 208                     | 1                     |
| 549218                                            | 2505138         | 87.838       | 4.46E-40 | 167      | 155                               | 298                             | 3                       | 146                   |
| 611132                                            | 4804048         | 85.366       | 4.27E-70 | 267      | 60                                | 298                             | 1                       | 246                   |
| 626509                                            | 4882993         | 85           | 4.3E-65  | 250      | 1                                 | 260                             | 3                       | 247                   |
| 630417                                            | 5035687         | 90.53        | 4.85E-94 | 346      | 12                                | 273                             | 1                       | 263                   |
| 868895                                            | 4920882         | 80.597       | 8.61E-47 | 189      | 22                                | 272                             | 267                     | 2                     |
| 1198537                                           | 4840609         | 91.473       | 1.47E-99 | 364      | 16                                | 273                             | 255                     | 1                     |
| 1199993                                           | 1608674         | 93.651       | 3.42E-46 | 187      | 174                               | 298                             | 199                     | 75                    |
| 1216720                                           | 1509566         | 84.672       | 3.5E-31  | 137      | 2                                 | 138                             | 2                       | 138                   |
| 1622760                                           | 4709637         | 91.593       | 5.05E-84 | 313      | 14                                | 239                             | 226                     | 1                     |

|         |         |        |           |     |     |     |     |     |
|---------|---------|--------|-----------|-----|-----|-----|-----|-----|
| 1734074 | 4829178 | 84.549 | 7.2E-63   | 243 | 35  | 267 | 250 | 25  |
| 952     | 5067871 | 85.075 | 9.1E-52   | 206 | 1   | 201 | 210 | 10  |
| 367283  | 4739216 | 87.342 | 1.99E-68  | 261 | 56  | 291 | 227 | 1   |
| 538393  | 4916377 | 100    | 1.21E-30  | 135 | 132 | 204 | 274 | 202 |
| 742878  | 4766705 | 92     | 7.44E-83  | 309 | 61  | 285 | 238 | 22  |
| 932951  | 1944978 | 97.297 | 4.99E-84  | 313 | 1   | 183 | 16  | 200 |
| 1854002 | 4964521 | 93.827 | 4.77E-100 | 366 | 59  | 301 | 243 | 1   |

---

**Table S4. The results of *blastn* alignment between the confirmed sex-linked loci of *A. loloensis* and the Y chromosome of *A. mantzorum***

| Sex-linked markers ID<br>( <i>A. loloensis</i> ) | Y chromosome ID | Identical(%) | Evalue   | Bitscore | Start<br>( <i>A. loloensis</i> ) | End<br>( <i>A. loloensis</i> ) | Start<br>Y chromosome | End<br>Y chromosome |
|--------------------------------------------------|-----------------|--------------|----------|----------|----------------------------------|--------------------------------|-----------------------|---------------------|
| 17160                                            | 4374706         | 97.516       | 5.99E-74 | 279      | 61                               | 221                            | 2                     | 162                 |
| 108219                                           | 5022234         | 95.862       | 4.33E-60 | 233      | 155                              | 298                            | 122                   | 265                 |
| 222513                                           | 1669284         | 90.244       | 2.98E-22 | 108      | 156                              | 237                            | 119                   | 38                  |
| 437654                                           | 4996225         | 93.75        | 4.36E-55 | 217      | 1                                | 144                            | 206                   | 63                  |
| 474811                                           | 1606400         | 97.315       | 3.39E-66 | 254      | 1                                | 149                            | 21                    | 169                 |
| 567427                                           | 3261089         | 96.479       | 4.40E-60 | 233      | 161                              | 302                            | 31                    | 170                 |
| 666795                                           | 4826205         | 91           | 4.52E-30 | 134      | 199                              | 298                            | 75                    | 173                 |
| 672096                                           | 4588967         | 93.662       | 2.04E-53 | 211      | 1                                | 140                            | 66                    | 207                 |
| 682957                                           | 4804007         | 86.111       | 9.18E-72 | 272      | 10                               | 252                            | 1                     | 246                 |
| 759013                                           | 1108966         | 99.038       | 3.42E-46 | 187      | 1                                | 104                            | 104                   | 1                   |
| 771638                                           | 4797436         | 90.909       | 1.61E-34 | 148      | 7                                | 116                            | 244                   | 135                 |
| 939843                                           | 3494899         | 94.483       | 9.66E-57 | 222      | 162                              | 306                            | 12                    | 155                 |
| 1025247                                          | 4584187         | 83.069       | 5.73E-44 | 180      | 47                               | 235                            | 194                   | 10                  |
| 1179745                                          | 1519702         | 94.215       | 1.23E-45 | 185      | 155                              | 275                            | 141                   | 21                  |
| 1181621                                          | 4590277         | 94.521       | 2.61E-57 | 224      | 1                                | 144                            | 194                   | 49                  |
| 1303568                                          | 4762580         | 81.818       | 2.63E-52 | 207      | 43                               | 267                            | 7                     | 237                 |
| 1441139                                          | 4934951         | 96.503       | 3.35E-61 | 237      | 1                                | 143                            | 146                   | 4                   |
| 1444271                                          | 5081022         | 77.992       | 7.41E-43 | 176      | 15                               | 269                            | 226                   | 483                 |
| 1557047                                          | 5003094         | 80.707       | 3.71E-61 | 237      | 42                               | 327                            | 315                   | 5                   |
| 56610                                            | 4851114         | 88.276       | 9.58E-42 | 172      | 1                                | 144                            | 15                    | 159                 |
| 108264                                           | 4788343         | 86.301       | 3.47E-36 | 154      | 155                              | 298                            | 100                   | 242                 |
| 175943                                           | 5071735         | 78.616       | 3.41E-51 | 204      | 2                                | 299                            | 375                   | 65                  |



**Table S5. The results of *blastn* alignment between the confirmed sex-linked loci of *A. mantzorum* and the Y chromosome of *A. mantzorum***

| Sex-linked markers ID<br>( <i>A. mantzorum</i> ) | Y chromosome ID | Identical(%) | Evalue    | Bitscore | Start<br>( <i>A. mantzorum</i> ) | End<br>( <i>A. mantzorum</i> ) | Start<br>(Y chromosome) | End<br>(Y chromosome) |
|--------------------------------------------------|-----------------|--------------|-----------|----------|----------------------------------|--------------------------------|-------------------------|-----------------------|
| 18244                                            | 4642954         | 96.377       | 1.62E-58  | 228      | 100                              | 237                            | 138                     | 1                     |
| 26775                                            | 4968478         | 100          | 4.07E-50  | 200      | 1                                | 108                            | 108                     | 1                     |
| 28208                                            | 5032852         | 86.154       | 1.54E-69  | 265      | 28                               | 285                            | 4                       | 247                   |
| 30397                                            | 5022380         | 84.436       | 1.02E-65  | 252      | 1                                | 257                            | 295                     | 40                    |
| 37788                                            | 4976536         | 82.963       | 1.02E-25  | 119      | 113                              | 246                            | 1                       | 133                   |
| 53454                                            | 5057235         | 93.056       | 2.03E-53  | 211      | 155                              | 298                            | 384                     | 241                   |
| 58043                                            | 1420931         | 93           | 1.7E-33   | 145      | 136                              | 235                            | 193                     | 95                    |
| 63182                                            | 5067196         | 94.631       | 3.93E-130 | 466      | 1                                | 298                            | 56                      | 348                   |
| 87000                                            | 3211188         | 96.429       | 9.72E-32  | 139      | 4                                | 87                             | 90                      | 7                     |
| 95424                                            | 3672608         | 96.61        | 5.69E-49  | 196      | 159                              | 276                            | 200                     | 83                    |
| 97147                                            | 2240852         | 89.375       | 1.57E-50  | 202      | 1                                | 160                            | 183                     | 24                    |
| 121923                                           | 4972834         | 91.765       | 1.05E-95  | 351      | 1                                | 253                            | 42                      | 295                   |
| 155678                                           | 5023240         | 88.538       | 2.52E-82  | 307      | 65                               | 298                            | 332                     | 80                    |
| 164925                                           | 5081665         | 86.458       | 8.99E-87  | 322      | 1                                | 275                            | 411                     | 125                   |
| 173183                                           | 3249843         | 93.642       | 6.73E-68  | 259      | 1                                | 173                            | 28                      | 200                   |
| 190141                                           | 4943254         | 100          | 3.52E-80  | 300      | 1                                | 162                            | 187                     | 26                    |
| 204894                                           | 4633153         | 100          | 1.58E-49  | 198      | 1                                | 107                            | 90                      | 196                   |
| 207705                                           | 3898677         | 95.62        | 3.41E-56  | 220      | 148                              | 284                            | 200                     | 64                    |
| 209662                                           | 4574591         | 95.833       | 4.33E-60  | 233      | 155                              | 298                            | 36                      | 179                   |
| 232286                                           | 5004750         | 87.395       | 4.24E-75  | 283      | 1                                | 238                            | 84                      | 317                   |

|        |         |        |           |     |     |     |     |     |
|--------|---------|--------|-----------|-----|-----|-----|-----|-----|
| 233351 | 4852818 | 95.726 | 6.81E-103 | 375 | 65  | 298 | 257 | 31  |
| 234342 | 5012283 | 100    | 2.58E-106 | 387 | 1   | 209 | 209 | 1   |
| 248054 | 1404413 | 89.437 | 5.81E-44  | 180 | 161 | 302 | 43  | 184 |
| 265765 | 5015806 | 98.467 | 2.01E-127 | 457 | 1   | 257 | 3   | 263 |
| 265999 | 2009904 | 100    | 3.16E-100 | 366 | 39  | 236 | 1   | 198 |
| 300023 | 4031839 | 96.825 | 1.75E-53  | 211 | 1   | 126 | 126 | 1   |
| 328452 | 4664278 | 97.561 | 2.03E-53  | 211 | 1   | 123 | 49  | 171 |
| 328800 | 2901679 | 95.276 | 4.4E-50   | 200 | 1   | 125 | 128 | 2   |
| 337208 | 4979060 | 83.621 | 2.56E-52  | 207 | 65  | 289 | 230 | 3   |
| 389234 | 5068893 | 81.034 | 1.57E-54  | 215 | 18  | 298 | 127 | 403 |
| 401704 | 5017859 | 84.337 | 3.68E-60  | 233 | 10  | 257 | 258 | 20  |
| 418422 | 5035965 | 90.987 | 1.21E-84  | 315 | 1   | 233 | 114 | 346 |
| 480380 | 5036725 | 93.6   | 3.42E-46  | 187 | 1   | 125 | 126 | 250 |
| 484859 | 4726950 | 92.222 | 7.69E-67  | 255 | 1   | 180 | 226 | 47  |
| 537404 | 4791185 | 95.276 | 6.76E-108 | 392 | 9   | 262 | 243 | 1   |
| 562586 | 4866337 | 95.868 | 1.12E-110 | 401 | 57  | 298 | 1   | 239 |
| 566413 | 3341701 | 91.121 | 1.99E-73  | 278 | 36  | 249 | 200 | 1   |
| 570183 | 4987816 | 90     | 2.08E-87  | 324 | 1   | 250 | 26  | 275 |
| 584035 | 4116935 | 94     | 2.49E-81  | 303 | 27  | 226 | 200 | 1   |
| 615478 | 4545862 | 94.595 | 5.45E-79  | 296 | 1   | 185 | 182 | 1   |
| 625139 | 4921675 | 100    | 7.24E-67  | 255 | 102 | 239 | 1   | 138 |
| 647202 | 4972834 | 91.732 | 3.79E-95  | 350 | 25  | 276 | 294 | 42  |
| 651335 | 4851316 | 91.791 | 3.42E-46  | 187 | 166 | 298 | 134 | 1   |
| 658924 | 5054703 | 85.666 | 1.92E-78  | 294 | 1   | 293 | 325 | 48  |

|        |         |        |           |     |     |     |     |     |
|--------|---------|--------|-----------|-----|-----|-----|-----|-----|
| 685652 | 3367885 | 97.917 | 4.3E-65   | 250 | 1   | 144 | 153 | 10  |
| 690472 | 2371873 | 91.463 | 6.88E-58  | 226 | 107 | 270 | 1   | 164 |
| 743122 | 1571128 | 91.057 | 3.79E-40  | 167 | 27  | 149 | 198 | 76  |
| 744602 | 1244361 | 92.632 | 2.74E-31  | 137 | 142 | 236 | 127 | 33  |
| 746146 | 4570675 | 98.795 | 1.38E-34  | 148 | 177 | 259 | 1   | 83  |
| 763836 | 4772240 | 93.182 | 5.23E-29  | 130 | 182 | 269 | 1   | 88  |
| 769733 | 4609666 | 100    | 1.57E-54  | 215 | 183 | 298 | 5   | 120 |
| 776062 | 4766190 | 95.089 | 2.46E-97  | 357 | 75  | 298 | 1   | 219 |
| 776905 | 1570806 | 97.987 | 6.86E-68  | 259 | 139 | 287 | 1   | 149 |
| 777911 | 4724642 | 85.811 | 9.79E-37  | 156 | 1   | 148 | 223 | 78  |
| 802711 | 1410597 | 100    | 2.72E-61  | 237 | 120 | 247 | 193 | 66  |
| 819045 | 5076008 | 99.585 | 1.88E-122 | 440 | 1   | 241 | 476 | 236 |
| 829082 | 4623078 | 100    | 1.15E-79  | 298 | 72  | 232 | 205 | 45  |
| 834130 | 4834986 | 100    | 8.17E-27  | 122 | 174 | 239 | 66  | 1   |
| 852213 | 4756510 | 87.838 | 9.79E-42  | 172 | 1   | 146 | 230 | 83  |
| 855435 | 4648778 | 99.49  | 2.17E-97  | 357 | 71  | 266 | 1   | 196 |
| 869165 | 4760597 | 91.08  | 2.64E-76  | 287 | 34  | 245 | 236 | 24  |
| 883143 | 1581493 | 100    | 2.64E-41  | 171 | 143 | 234 | 140 | 49  |
| 891681 | 5013683 | 91.892 | 1.23E-50  | 202 | 3   | 145 | 131 | 278 |
| 894250 | 3510947 | 85.279 | 6.03E-48  | 193 | 1   | 196 | 5   | 191 |
| 900558 | 4532774 | 92.233 | 4.48E-34  | 147 | 110 | 212 | 116 | 14  |
| 915590 | 1576788 | 97.479 | 3.4E-51   | 204 | 180 | 298 | 7   | 125 |
| 916581 | 4962201 | 91.489 | 1.88E-108 | 394 | 1   | 268 | 282 | 1   |
| 918362 | 4970510 | 100    | 3.42E-46  | 187 | 198 | 298 | 296 | 196 |

|         |         |        |           |     |     |     |     |     |
|---------|---------|--------|-----------|-----|-----|-----|-----|-----|
| 922244  | 4937546 | 91.971 | 2.67E-47  | 191 | 164 | 300 | 223 | 88  |
| 924940  | 4679482 | 100    | 5.77E-39  | 163 | 1   | 88  | 88  | 1   |
| 940747  | 4766168 | 82.581 | 1.62E-34  | 148 | 106 | 253 | 157 | 3   |
| 946208  | 4946515 | 93.122 | 6.63E-73  | 276 | 2   | 189 | 83  | 270 |
| 947145  | 1662622 | 93.617 | 2.03E-53  | 211 | 156 | 296 | 160 | 20  |
| 973436  | 5010626 | 91.011 | 1.21E-60  | 235 | 1   | 175 | 143 | 318 |
| 978251  | 4988413 | 78.261 | 3.5E-36   | 154 | 24  | 292 | 39  | 296 |
| 993947  | 4737694 | 100    | 2.8E-31   | 137 | 1   | 74  | 74  | 1   |
| 1003786 | 4962279 | 88.152 | 5.9E-63   | 243 | 33  | 243 | 1   | 202 |
| 1006958 | 5025138 | 95.703 | 5.15E-119 | 429 | 1   | 255 | 78  | 333 |
| 1008788 | 5012283 | 100    | 8.26E-107 | 388 | 41  | 250 | 1   | 210 |
| 1012801 | 3279155 | 90     | 3.8E-25   | 117 | 128 | 218 | 90  | 1   |
| 1023181 | 3974299 | 90.476 | 2.12E-23  | 111 | 215 | 298 | 1   | 84  |
| 1025093 | 4992483 | 86.76  | 7.03E-83  | 309 | 17  | 299 | 306 | 30  |
| 1030043 | 4908215 | 91.628 | 1.53E-74  | 281 | 84  | 298 | 271 | 74  |
| 1040159 | 4959049 | 100    | 4.27E-70  | 267 | 155 | 298 | 10  | 153 |
| 1091816 | 4679514 | 99.31  | 4.57E-69  | 263 | 107 | 251 | 1   | 145 |
| 1124302 | 3818692 | 88.889 | 9.82E-36  | 152 | 11  | 136 | 78  | 200 |
| 1131597 | 1280879 | 96.341 | 1.26E-30  | 135 | 3   | 84  | 151 | 70  |
| 1173982 | 4729808 | 86.854 | 2.11E-58  | 228 | 76  | 280 | 216 | 7   |
| 1243679 | 4735224 | 100    | 1.28E-35  | 152 | 1   | 82  | 82  | 1   |
| 1282458 | 4626402 | 100    | 2.77E-96  | 353 | 1   | 191 | 191 | 1   |
| 1291353 | 5076964 | 83.092 | 9.64E-46  | 185 | 4   | 208 | 280 | 75  |
| 1306289 | 4998853 | 86.415 | 1.3E-74   | 281 | 1   | 255 | 275 | 11  |

|         |         |        |          |     |     |     |     |     |
|---------|---------|--------|----------|-----|-----|-----|-----|-----|
| 1318426 | 4954737 | 88.06  | 2.52E-82 | 307 | 1   | 268 | 257 | 1   |
| 1347628 | 2398347 | 96.97  | 1.76E-23 | 111 | 187 | 252 | 173 | 108 |
| 1394770 | 4698575 | 91.566 | 4.7E-59  | 230 | 5   | 170 | 200 | 35  |
| 1408062 | 5027445 | 98.438 | 2.26E-57 | 224 | 135 | 262 | 1   | 127 |
| 1408174 | 4813246 | 99.029 | 2.7E-101 | 370 | 53  | 258 | 248 | 43  |
| 1500699 | 4746871 | 91.589 | 4.38E-34 | 147 | 115 | 220 | 179 | 73  |
| 1509652 | 4986404 | 100    | 2.88E-56 | 220 | 140 | 258 | 1   | 119 |
| 1516997 | 5068067 | 85.909 | 4.56E-60 | 233 | 97  | 312 | 135 | 348 |
| 1593732 | 1689522 | 93.939 | 1.29E-64 | 248 | 88  | 252 | 183 | 20  |
| 1628703 | 2279256 | 94.512 | 1.07E-65 | 252 | 96  | 259 | 23  | 185 |
| 1654420 | 4990754 | 83.045 | 4.27E-70 | 267 | 20  | 296 | 307 | 22  |
| 1711378 | 1703260 | 100    | 2.62E-36 | 154 | 149 | 231 | 177 | 95  |
| 1784854 | 4734202 | 84.615 | 9.48E-52 | 206 | 4   | 222 | 229 | 22  |
| 1836447 | 4757494 | 88.136 | 4.4E-74  | 279 | 4   | 237 | 1   | 236 |
| 2009947 | 4727862 | 88.889 | 7.15E-68 | 259 | 1   | 215 | 20  | 229 |
| 2014881 | 1880953 | 86.765 | 1.04E-35 | 152 | 9   | 143 | 137 | 3   |
| 2156495 | 4827517 | 100    | 4.8E-29  | 130 | 1   | 70  | 152 | 221 |
| 4713597 | 4720454 | 87.838 | 1.2E-70  | 268 | 89  | 300 | 228 | 8   |
| 47865   | 3332825 | 91.414 | 1.54E-69 | 265 | 23  | 220 | 3   | 191 |
| 85869   | 4815345 | 100    | 3.16E-66 | 254 | 148 | 284 | 247 | 111 |
| 102407  | 2315176 | 92.958 | 2.63E-52 | 207 | 157 | 298 | 32  | 173 |
| 185113  | 4908621 | 96.512 | 7.51E-33 | 143 | 1   | 86  | 12  | 97  |
| 264716  | 3528847 | 92.537 | 1.02E-45 | 185 | 118 | 251 | 200 | 74  |
| 286416  | 3610782 | 93.939 | 4.05E-65 | 250 | 117 | 281 | 1   | 165 |

|         |         |        |           |     |     |     |     |     |
|---------|---------|--------|-----------|-----|-----|-----|-----|-----|
| 287638  | 4834692 | 99.197 | 3.66E-125 | 449 | 30  | 278 | 1   | 249 |
| 351671  | 4961062 | 94.406 | 1.21E-55  | 219 | 3   | 144 | 161 | 19  |
| 351961  | 4992563 | 82.156 | 6.67E-58  | 226 | 3   | 269 | 41  | 306 |
| 413755  | 1755898 | 84.138 | 1.3E-29   | 132 | 75  | 210 | 175 | 32  |
| 436585  | 4679190 | 100    | 1.63E-93  | 344 | 1   | 186 | 35  | 220 |
| 513688  | 4798912 | 90.123 | 7.73E-53  | 209 | 153 | 314 | 214 | 55  |
| 1058326 | 4665522 | 100    | 6.05E-33  | 143 | 1   | 77  | 77  | 1   |
| 2310697 | 1638582 | 93.056 | 2.04E-53  | 211 | 156 | 299 | 163 | 20  |
| 4209471 | 4651556 | 98.333 | 2.03E-53  | 211 | 179 | 298 | 203 | 84  |
| 4404171 | 2723987 | 93.5   | 1.5E-84   | 315 | 95  | 292 | 1   | 200 |

---

**Table S6. The results of *blastn* alignment between the confirmed sex-linked loci of *A. sp.* and the Y chromosome of *A. mantzorum***

| Sex-linked markers ID<br>( <i>A. sp.</i> ) | Y chromosome ID | Identical(%) | Evalue   | Bitscore | Start<br>( <i>A. sp.</i> ) | End<br>( <i>A. sp.</i> ) | Start<br>(Y chromosome) | End<br>(Y chromosome) |
|--------------------------------------------|-----------------|--------------|----------|----------|----------------------------|--------------------------|-------------------------|-----------------------|
| 46910                                      | 4842059         | 100          | 4.27E-70 | 267      | 1                          | 144                      | 159                     | 16                    |
| 87634                                      | 5022680         | 100          | 4.27E-70 | 267      | 1                          | 144                      | 90                      | 233                   |
| 103972                                     | 4554218         | 98.611       | 9.25E-67 | 255      | 1                          | 144                      | 181                     | 38                    |
| 208821                                     | 4975549         | 87.456       | 6.9E-93  | 342      | 7                          | 286                      | 287                     | 1                     |
| 244230                                     | 5026205         | 87.591       | 1.25E-35 | 152      | 5                          | 138                      | 132                     | 1                     |
| 306265                                     | 4979642         | 98.026       | 1.58E-69 | 265      | 1                          | 152                      | 98                      | 249                   |
| 476103                                     | 2542448         | 98.361       | 1.57E-54 | 215      | 8                          | 129                      | 200                     | 79                    |
| 476999                                     | 4750696         | 100          | 7.36E-48 | 193      | 195                        | 298                      | 176                     | 73                    |
| 497406                                     | 4801976         | 99.306       | 1.99E-68 | 261      | 155                        | 298                      | 231                     | 88                    |
| 654819                                     | 5013689         | 88.235       | 1.64E-44 | 182      | 1                          | 153                      | 235                     | 85                    |
| 1042367                                    | 4818549         | 91.011       | 3.52E-26 | 121      | 168                        | 256                      | 122                     | 34                    |
| 1399857                                    | 4606738         | 81.618       | 2.12E-23 | 111      | 155                        | 289                      | 35                      | 170                   |
| 1413441                                    | 4388296         | 94.558       | 7.55E-58 | 226      | 1                          | 147                      | 183                     | 38                    |
| 1417574                                    | 5064039         | 99.306       | 1.99E-68 | 261      | 155                        | 298                      | 25                      | 168                   |
| 209692                                     | 5041325         | 90.278       | 3.42E-46 | 187      | 155                        | 298                      | 299                     | 157                   |

|         |         |        |          |     |     |     |     |     |
|---------|---------|--------|----------|-----|-----|-----|-----|-----|
| 284336  | 1298998 | 97.203 | 7.2E-63  | 243 | 1   | 143 | 179 | 37  |
| 121897  | 1342015 | 92.857 | 2.43E-57 | 224 | 126 | 279 | 18  | 171 |
| 374836  | 2782463 | 96.241 | 9.59E-56 | 219 | 109 | 241 | 35  | 167 |
| 1740912 | 4891784 | 92.275 | 2.75E-92 | 340 | 72  | 303 | 230 | 1   |
| 3408995 | 4890420 | 88.079 | 2.01E-43 | 178 | 9   | 159 | 150 | 1   |
| 4145899 | 4630072 | 95.302 | 4.96E-61 | 237 | 176 | 324 | 189 | 41  |
| 4533779 | 5064772 | 92.857 | 1.49E-63 | 244 | 1   | 168 | 269 | 102 |
| 5559010 | 1945796 | 87.302 | 2.51E-32 | 141 | 1   | 126 | 63  | 185 |

---



**Table S7. The results of *blastn* alignment between the confirmed sex-linked loci of *A. tuberodepressus* and the Y chromosome of *A. mantzorum***

| Sex-linked markers ID<br>( <i>A. tuberodepressus</i> ) | Y chromosome ID | Identical(%) | Evalue   | Bitscore | Start<br>( <i>A. tuberodepressus</i> ) | End<br>( <i>A. tuberodepressus</i> ) | Start<br>(Y chromosome) | End<br>(Y chromosome) |
|--------------------------------------------------------|-----------------|--------------|----------|----------|----------------------------------------|--------------------------------------|-------------------------|-----------------------|
| 12820                                                  | 4605902         | 92.308       | 1.82E-78 | 294      | 58                                     | 262                                  | 209                     | 2                     |
| 120578                                                 | 1263692         | 94.074       | 8.23E-52 | 206      | 79                                     | 213                                  | 135                     | 1                     |
| 131205                                                 | 5037059         | 90.074       | 3.22E-91 | 337      | 43                                     | 299                                  | 348                     | 80                    |
| 145578                                                 | 4503836         | 89.809       | 9.39E-51 | 202      | 50                                     | 206                                  | 9                       | 165                   |
| 157801                                                 | 5068637         | 86.01        | 4.59E-50 | 200      | 23                                     | 215                                  | 87                      | 270                   |
| 234857                                                 | 1524139         | 95.833       | 4.53E-60 | 233      | 1                                      | 144                                  | 174                     | 31                    |
| 291880                                                 | 4991220         | 88.583       | 8.42E-82 | 305      | 18                                     | 270                                  | 1                       | 251                   |
| 312165                                                 | 5008487         | 90.698       | 5.41E-24 | 113      | 1                                      | 85                                   | 255                     | 170                   |
| 312473                                                 | 4841501         | 91.498       | 3.89E-90 | 333      | 42                                     | 281                                  | 255                     | 10                    |
| 334090                                                 | 2727309         | 88.66        | 1.2E-60  | 235      | 43                                     | 236                                  | 1                       | 193                   |
| 448630                                                 | 4588193         | 95.139       | 2.02E-58 | 228      | 1                                      | 144                                  | 150                     | 7                     |
| 476506                                                 | 2261084         | 87.5         | 2.72E-27 | 124      | 1                                      | 112                                  | 95                      | 200                   |
| 898607                                                 | 4980170         | 86.517       | 8.96E-47 | 189      | 109                                    | 282                                  | 183                     | 10                    |
| 915884                                                 | 4906698         | 84.348       | 4.33E-60 | 233      | 2                                      | 219                                  | 36                      | 265                   |
| 1167728                                                | 2780333         | 91.608       | 1.92E-48 | 195      | 3                                      | 143                                  | 59                      | 200                   |
| 2016611                                                | 4657716         | 89.205       | 1.08E-56 | 222      | 155                                    | 330                                  | 176                     | 1                     |
| 2205008                                                | 5064031         | 95.238       | 4.52E-30 | 134      | 169                                    | 252                                  | 2                       | 85                    |
| 2895800                                                | 4747971         | 89.565       | 2.28E-77 | 291      | 42                                     | 271                                  | 234                     | 7                     |
| 3320173                                                | 1289776         | 95.238       | 5.61E-59 | 230      | 155                                    | 298                                  | 159                     | 13                    |

|         |         |        |           |     |     |     |     |     |
|---------|---------|--------|-----------|-----|-----|-----|-----|-----|
| 44236   | 4668816 | 89.655 | 4.57E-45  | 183 | 1   | 144 | 36  | 179 |
| 151493  | 4301340 | 96     | 4.17E-75  | 283 | 12  | 185 | 24  | 198 |
| 281120  | 5065425 | 94.495 | 4.14E-95  | 350 | 1   | 217 | 235 | 20  |
| 324456  | 1305761 | 95.238 | 4.52E-30  | 134 | 215 | 298 | 190 | 107 |
| 657724  | 4937294 | 82.857 | 1.2E-65   | 252 | 34  | 298 | 280 | 6   |
| 699597  | 4774882 | 81.696 | 3.13E-46  | 187 | 19  | 240 | 4   | 225 |
| 892878  | 5043309 | 79.57  | 9.45E-52  | 206 | 13  | 285 | 289 | 19  |
| 927772  | 1292191 | 95.604 | 5.08E-35  | 150 | 245 | 334 | 1   | 91  |
| 1190626 | 5059939 | 93.464 | 6.93E-58  | 226 | 1   | 152 | 139 | 291 |
| 1219551 | 5029678 | 87.97  | 2.68E-37  | 158 | 166 | 298 | 301 | 169 |
| 1223607 | 5070512 | 92.308 | 2.12E-23  | 111 | 1   | 78  | 306 | 383 |
| 1490677 | 4984216 | 84.81  | 1.45E-54  | 215 | 33  | 266 | 66  | 280 |
| 1546432 | 4921609 | 91.096 | 7.38E-48  | 193 | 155 | 299 | 114 | 254 |
| 1669022 | 4956423 | 90.909 | 3.17E-101 | 370 | 14  | 298 | 1   | 271 |
| 1932617 | 4928197 | 97.727 | 3.03E-81  | 303 | 1   | 176 | 104 | 279 |

---

**Table S8. The results of *blastn* alignment between the confirmed sex-linked loci of *A. wuyiensis* and the Y chromosome of *A. mantzorum***

| Sex-linked markers ID<br>( <i>A. wuyiensis</i> ) | Y chromosome ID | Identical(%) | Evalue   | Bitscore | Start<br>( <i>A. wuyiensis</i> ) | End<br>( <i>A. wuyiensis</i> ) | Start<br>Y chromosome | End<br>Y chromosome |
|--------------------------------------------------|-----------------|--------------|----------|----------|----------------------------------|--------------------------------|-----------------------|---------------------|
| 308740                                           | 4609812         | 86.916       | 3.52E-26 | 121      | 192                              | 298                            | 121                   | 15                  |
| 407109                                           | 5060375         | 82.386       | 1.18E-35 | 152      | 110                              | 284                            | 32                    | 206                 |
| 496223                                           | 1599208         | 79.375       | 3.31E-21 | 104      | 109                              | 265                            | 5                     | 158                 |
| 581766                                           | 5036611         | 91.538       | 2.06E-43 | 178      | 1                                | 128                            | 308                   | 179                 |
| 764303                                           | 4603686         | 88.034       | 3.5E-31  | 137      | 4                                | 120                            | 202                   | 87                  |
| 960052                                           | 1568656         | 86.364       | 4.18E-40 | 167      | 20                               | 173                            | 154                   | 2                   |
| 1146109                                          | 5076106         | 85.906       | 1.93E-88 | 327      | 1                                | 298                            | 111                   | 401                 |
| 2259651                                          | 4724876         | 93.75        | 3.35E-26 | 121      | 3                                | 82                             | 89                    | 10                  |
| 165357                                           | 4615220         | 93.151       | 2.74E-22 | 108      | 72                               | 144                            | 85                    | 13                  |

**Table S9. The results of *blastn* alignment between the confirmed sex-linked loci of *A. xindugiao* and the Y chromosome of *A. mantzorum***

| Sex-linked markers ID<br>( <i>A. xindugiao</i> ) | Y chromosome ID | Identical(%) | Evalue   | Bitscore | Start<br>( <i>A. xindugiao</i> ) | End<br>( <i>A. xindugiao</i> ) | Start<br>(Y chromosome) | End<br>(Y chromosome) |
|--------------------------------------------------|-----------------|--------------|----------|----------|----------------------------------|--------------------------------|-------------------------|-----------------------|
| 9843                                             | 4901710         | 94.924       | 2.36E-82 | 307      | 3                                | 198                            | 70                      | 265                   |
| 21814                                            | 4015891         | 87.288       | 1.12E-30 | 135      | 5                                | 122                            | 132                     | 15                    |
| 34238                                            | 5024600         | 98.131       | 3.42E-46 | 187      | 34                               | 140                            | 3                       | 109                   |
| 42925                                            | 4845090         | 92.5         | 5E-24    | 113      | 1                                | 80                             | 65                      | 143                   |
| 49188                                            | 4816829         | 90.984       | 5.93E-88 | 326      | 18                               | 257                            | 1                       | 244                   |
| 161894                                           | 4571131         | 84.5         | 1.35E-49 | 198      | 25                               | 224                            | 205                     | 6                     |
| 174020                                           | 4925829         | 93.064       | 3.61E-65 | 250      | 73                               | 245                            | 209                     | 40                    |
| 177220                                           | 4848862         | 92.5         | 1.68E-58 | 228      | 1                                | 160                            | 243                     | 86                    |
| 185243                                           | 4986522         | 92.308       | 3.4E-51  | 204      | 155                              | 297                            | 297                     | 155                   |
| 205093                                           | 4703356         | 95.402       | 1.64E-73 | 278      | 1                                | 174                            | 17                      | 190                   |
| 235379                                           | 5081381         | 92.766       | 9.6E-91  | 335      | 24                               | 252                            | 496                     | 262                   |
| 248710                                           | 4962503         | 90.299       | 1.35E-94 | 348      | 1                                | 268                            | 20                      | 283                   |
| 261179                                           | 4771874         | 93.868       | 2.77E-86 | 320      | 1                                | 212                            | 28                      | 239                   |
| 270491                                           | 4981812         | 79.891       | 3.76E-30 | 134      | 32                               | 213                            | 287                     | 104                   |
| 276980                                           | 5008837         | 92.715       | 2.03E-53 | 211      | 1                                | 144                            | 109                     | 259                   |
| 291938                                           | 4551514         | 88.462       | 3.53E-26 | 121      | 1                                | 100                            | 93                      | 194                   |
| 295780                                           | 4385856         | 92.135       | 2.72E-27 | 124      | 45                               | 133                            | 1                       | 88                    |
| 305104                                           | 2084386         | 93.125       | 3.46E-60 | 233      | 86                               | 243                            | 200                     | 41                    |
| 315504                                           | 4675784         | 97.073       | 1.81E-93 | 344      | 80                               | 283                            | 1                       | 205                   |
| 317076                                           | 4842521         | 81.435       | 5.73E-44 | 180      | 65                               | 298                            | 253                     | 29                    |

|        |         |        |           |     |     |     |     |     |
|--------|---------|--------|-----------|-----|-----|-----|-----|-----|
| 322800 | 4869989 | 85.124 | 1.01E-25  | 119 | 53  | 171 | 162 | 46  |
| 327585 | 5062224 | 95.331 | 7.4E-112  | 405 | 2   | 258 | 376 | 123 |
| 335624 | 4969680 | 89.216 | 6.54E-28  | 126 | 159 | 260 | 161 | 261 |
| 337909 | 4581586 | 98.361 | 2.79E-86  | 320 | 81  | 261 | 206 | 24  |
| 377554 | 4561986 | 90.244 | 7.46E-38  | 159 | 177 | 298 | 204 | 82  |
| 381837 | 1525081 | 95.172 | 2.02E-58  | 228 | 155 | 298 | 194 | 50  |
| 383683 | 4987816 | 89.105 | 4.64E-84  | 313 | 1   | 257 | 26  | 275 |
| 413110 | 1546693 | 93.548 | 1.41E-44  | 182 | 148 | 267 | 125 | 2   |
| 427134 | 4984920 | 82.258 | 1.78E-53  | 211 | 20  | 265 | 16  | 261 |
| 441478 | 4916733 | 93.72  | 6E-83     | 309 | 1   | 207 | 20  | 225 |
| 451609 | 4780681 | 86.014 | 1.05E-35  | 152 | 52  | 194 | 219 | 79  |
| 500215 | 4929185 | 98.649 | 1.34E-29  | 132 | 145 | 218 | 87  | 14  |
| 543427 | 5002305 | 95.395 | 6.35E-63  | 243 | 115 | 266 | 107 | 258 |
| 546456 | 4929739 | 88.934 | 3.69E-80  | 300 | 21  | 264 | 243 | 2   |
| 548943 | 5056782 | 93.522 | 9.46E-101 | 368 | 6   | 252 | 329 | 83  |
| 548972 | 1374375 | 92.806 | 3.62E-50  | 200 | 112 | 250 | 159 | 22  |
| 558580 | 5043566 | 100    | 1.71E-23  | 111 | 1   | 60  | 357 | 298 |
| 581564 | 4947461 | 90.526 | 1.05E-65  | 252 | 54  | 243 | 1   | 190 |
| 621084 | 5047274 | 88.931 | 3.69E-85  | 316 | 12  | 266 | 6   | 267 |
| 660521 | 4920508 | 83.206 | 3.52E-26  | 121 | 1   | 131 | 163 | 33  |
| 669622 | 4723270 | 86.463 | 5.19E-59  | 230 | 12  | 217 | 229 | 1   |
| 676260 | 5065766 | 92.135 | 7.57E-28  | 126 | 3   | 91  | 413 | 325 |
| 708316 | 1762492 | 92.143 | 6.46E-48  | 193 | 1   | 135 | 24  | 163 |
| 710425 | 4898863 | 88.421 | 1.82E-58  | 228 | 82  | 271 | 260 | 73  |

|         |         |        |          |     |     |     |     |     |
|---------|---------|--------|----------|-----|-----|-----|-----|-----|
| 717152  | 5001471 | 93.966 | 3.70E-95 | 350 | 3   | 233 | 83  | 314 |
| 743626  | 4679096 | 93.119 | 9.75E-86 | 318 | 35  | 250 | 1   | 218 |
| 761785  | 4872411 | 93.617 | 2.29E-72 | 274 | 46  | 229 | 185 | 1   |
| 773439  | 4940514 | 87.5   | 4.85E-64 | 246 | 51  | 263 | 20  | 234 |
| 784541  | 4906408 | 82.266 | 1.62E-39 | 165 | 104 | 301 | 1   | 190 |
| 793228  | 2312438 | 85.075 | 3.05E-31 | 137 | 109 | 242 | 62  | 195 |
| 795876  | 4934255 | 90.717 | 3.52E-85 | 316 | 17  | 253 | 1   | 237 |
| 803765  | 5049660 | 87.137 | 3.55E-70 | 267 | 18  | 251 | 102 | 342 |
| 825300  | 1627822 | 89.56  | 4.99E-59 | 230 | 31  | 210 | 200 | 19  |
| 827704  | 4936932 | 96.026 | 4.65E-64 | 246 | 103 | 253 | 242 | 92  |
| 846857  | 4955311 | 85.635 | 5.01E-44 | 180 | 11  | 180 | 104 | 284 |
| 848368  | 5043139 | 87.333 | 3.19E-96 | 353 | 1   | 297 | 53  | 349 |
| 855366  | 4970522 | 85.606 | 1.63E-29 | 132 | 14  | 144 | 260 | 135 |
| 878964  | 4806097 | 90.123 | 3.05E-21 | 104 | 146 | 226 | 64  | 143 |
| 914376  | 1520206 | 93.252 | 8.46E-62 | 239 | 24  | 186 | 1   | 162 |
| 932913  | 3173986 | 87.719 | 4.52E-30 | 134 | 29  | 142 | 200 | 87  |
| 942805  | 1391549 | 88.889 | 5.77E-39 | 163 | 1   | 133 | 163 | 31  |
| 953266  | 4623658 | 94.366 | 4.36E-55 | 217 | 155 | 295 | 23  | 164 |
| 963563  | 4728112 | 86.585 | 2.57E-67 | 257 | 18  | 263 | 230 | 1   |
| 970511  | 4429492 | 89.444 | 1.68E-58 | 228 | 74  | 253 | 5   | 184 |
| 988318  | 5078920 | 78.283 | 8.42E-27 | 122 | 30  | 224 | 352 | 547 |
| 990637  | 1270850 | 98.131 | 2.78E-46 | 187 | 1   | 107 | 133 | 27  |
| 1005114 | 4985608 | 94.631 | 4.76E-59 | 230 | 109 | 257 | 239 | 92  |
| 1014296 | 4214655 | 87.701 | 3.67E-55 | 217 | 68  | 254 | 194 | 9   |

|         |         |        |          |     |     |     |     |     |
|---------|---------|--------|----------|-----|-----|-----|-----|-----|
| 1020825 | 4630785 | 88.966 | 2.66E-42 | 174 | 5   | 144 | 212 | 68  |
| 1034214 | 5068917 | 92.369 | 2.60E-96 | 353 | 1   | 248 | 369 | 122 |
| 1040632 | 5067274 | 85.714 | 1.05E-40 | 169 | 42  | 209 | 10  | 168 |
| 1043391 | 4555300 | 92.174 | 1.70E-38 | 161 | 136 | 249 | 179 | 65  |
| 1065118 | 1313313 | 90.164 | 2.13E-37 | 158 | 16  | 136 | 62  | 182 |
| 1072143 | 1512504 | 84.536 | 2.23E-47 | 191 | 62  | 255 | 1   | 193 |
| 1080984 | 4803217 | 84.906 | 3.55E-21 | 104 | 35  | 139 | 60  | 163 |
| 1087523 | 4983762 | 91.667 | 3.30E-71 | 270 | 95  | 298 | 1   | 191 |
| 1102583 | 4812800 | 94.495 | 3.43E-40 | 167 | 94  | 201 | 1   | 108 |
| 1133476 | 4694982 | 90.265 | 5.10E-34 | 147 | 1   | 112 | 102 | 214 |
| 1136078 | 4842587 | 85.398 | 4.86E-59 | 230 | 2   | 226 | 23  | 243 |
| 1145170 | 4748683 | 93.662 | 2.03E-53 | 211 | 1   | 140 | 11  | 152 |
| 1155734 | 5066716 | 87.931 | 3.50E-31 | 137 | 4   | 119 | 116 | 1   |
| 1166734 | 4921793 | 93.478 | 2.94E-31 | 137 | 1   | 92  | 40  | 131 |
| 1177553 | 2784233 | 89.72  | 1.10E-30 | 135 | 92  | 196 | 199 | 93  |
| 1178246 | 5013685 | 84.431 | 1.41E-39 | 165 | 2   | 168 | 196 | 30  |
| 1179969 | 4771322 | 91.946 | 6.26E-53 | 209 | 1   | 149 | 61  | 209 |
| 1183839 | 4839007 | 87.407 | 9.65E-37 | 156 | 155 | 289 | 79  | 213 |
| 1208794 | 1945860 | 86.301 | 9.65E-37 | 156 | 155 | 298 | 27  | 171 |
| 1231889 | 4902167 | 95.146 | 2.22E-87 | 324 | 1   | 205 | 217 | 13  |
| 1248360 | 1509474 | 96.503 | 3.36E-61 | 237 | 155 | 297 | 1   | 143 |
| 1258317 | 4588515 | 93.701 | 2.26E-47 | 191 | 131 | 257 | 198 | 72  |
| 1266544 | 5069844 | 95.139 | 2.02E-58 | 228 | 155 | 298 | 313 | 170 |
| 1266715 | 4959813 | 97.674 | 5.81E-34 | 147 | 213 | 298 | 103 | 19  |

|         |         |        |          |     |     |     |     |     |
|---------|---------|--------|----------|-----|-----|-----|-----|-----|
| 1284717 | 4995260 | 91.954 | 7.53E-62 | 239 | 1   | 169 | 92  | 265 |
| 1288168 | 4909358 | 82.09  | 3.37E-56 | 220 | 1   | 238 | 6   | 273 |
| 1299985 | 5043975 | 90.336 | 3.28E-80 | 300 | 1   | 238 | 333 | 110 |
| 1326745 | 4908920 | 86.486 | 3.82E-60 | 233 | 2   | 212 | 42  | 262 |
| 1333912 | 4646212 | 94.382 | 3.11E-31 | 137 | 1   | 89  | 127 | 215 |
| 1336205 | 5049142 | 98.592 | 2.32E-27 | 124 | 1   | 70  | 227 | 157 |
| 1339449 | 4975032 | 86.784 | 6.17E-63 | 243 | 34  | 249 | 298 | 72  |
| 1341381 | 4942437 | 91.837 | 1.44E-29 | 132 | 24  | 115 | 111 | 208 |
| 1353865 | 4924945 | 86.64  | 5.86E-68 | 259 | 1   | 231 | 32  | 278 |
| 1371474 | 1156831 | 98.78  | 5.00E-34 | 147 | 1   | 82  | 83  | 2   |
| 1415038 | 4568434 | 95.035 | 3.37E-56 | 220 | 155 | 295 | 140 | 1   |
| 1420641 | 5054431 | 86.726 | 6.51E-28 | 126 | 2   | 114 | 4   | 116 |
| 1443239 | 5076621 | 87.2   | 3.56E-75 | 283 | 7   | 254 | 266 | 18  |
| 1448966 | 4560084 | 93.431 | 2.91E-51 | 204 | 116 | 252 | 157 | 21  |
| 1451328 | 5038666 | 90.041 | 4.36E-84 | 313 | 3   | 243 | 340 | 100 |
| 1464357 | 4653746 | 95.62  | 2.87E-56 | 220 | 117 | 253 | 203 | 67  |
| 1489231 | 5027091 | 83.65  | 6.35E-63 | 243 | 3   | 263 | 75  | 334 |
| 1500334 | 5055282 | 89.764 | 6.01E-88 | 326 | 1   | 254 | 354 | 101 |
| 1508739 | 4857797 | 95.652 | 3.76E-45 | 183 | 140 | 254 | 146 | 259 |
| 1516483 | 2545396 | 91.667 | 4.94E-54 | 213 | 109 | 264 | 158 | 7   |
| 1521070 | 5036503 | 98.113 | 1.68E-73 | 278 | 100 | 258 | 207 | 49  |
| 1580001 | 4940270 | 89.695 | 3.63E-90 | 333 | 5   | 264 | 271 | 10  |
| 1603325 | 4830151 | 93.182 | 2.10E-28 | 128 | 155 | 242 | 86  | 1   |
| 1656418 | 2777109 | 86.607 | 1.10E-25 | 119 | 2   | 111 | 110 | 3   |



|         |         |        |           |     |     |     |     |     |
|---------|---------|--------|-----------|-----|-----|-----|-----|-----|
| 1667951 | 1776400 | 92.784 | 2.79E-32  | 141 | 164 | 260 | 123 | 27  |
| 1734850 | 2519818 | 86.331 | 4.49E-35  | 150 | 161 | 298 | 196 | 58  |
| 1735045 | 4976424 | 93.197 | 5.65E-54  | 213 | 155 | 298 | 243 | 97  |
| 1793947 | 4992361 | 90.816 | 1.45E-29  | 132 | 164 | 261 | 120 | 217 |
| 1811491 | 5036641 | 89.865 | 5.26E-104 | 379 | 3   | 298 | 3   | 287 |
| 1838720 | 4978568 | 81.94  | 2.59E-62  | 241 | 3   | 298 | 290 | 8   |
| 1870037 | 5080200 | 95.349 | 2.99E-31  | 137 | 1   | 86  | 340 | 425 |
| 1959643 | 4947980 | 83.39  | 7.10E-73  | 276 | 1   | 291 | 281 | 1   |
| 1962342 | 4959399 | 97.902 | 5.57E-64  | 246 | 156 | 298 | 138 | 278 |
| 1969981 | 5064175 | 87.129 | 2.34E-57  | 224 | 72  | 270 | 410 | 212 |
| 1989698 | 5075918 | 85.993 | 3.21E-91  | 337 | 1   | 297 | 385 | 81  |
| 2061010 | 4563417 | 91.111 | 3.16E-26  | 121 | 11  | 99  | 90  | 1   |
| 2068662 | 1298254 | 98.473 | 1.38E-59  | 231 | 136 | 266 | 183 | 53  |
| 2126331 | 1470994 | 91.489 | 6.47E-68  | 259 | 66  | 253 | 195 | 8   |
| 2137370 | 1355381 | 87.912 | 2.24E-22  | 108 | 80  | 170 | 98  | 8   |
| 2190627 | 4804480 | 97.531 | 9.72E-32  | 139 | 1   | 81  | 230 | 150 |
| 2244384 | 4898525 | 88.288 | 5.23E-29  | 130 | 159 | 269 | 255 | 148 |
| 2312767 | 1855526 | 86.62  | 5.23E-34  | 147 | 66  | 197 | 197 | 58  |
| 2488300 | 3574289 | 90.71  | 6.43E-63  | 243 | 35  | 217 | 182 | 1   |
| 2506788 | 4902217 | 79.817 | 6.52E-33  | 143 | 44  | 260 | 38  | 239 |
| 2526984 | 1293865 | 97.222 | 8.31E-27  | 122 | 2   | 73  | 34  | 105 |
| 2613323 | 1208385 | 98.824 | 1.06E-35  | 152 | 1   | 85  | 126 | 42  |
| 2751317 | 5036943 | 91.473 | 2.74E-96  | 353 | 4   | 260 | 57  | 313 |
| 2797506 | 4637267 | 85.638 | 2.31E-47  | 191 | 29  | 208 | 1   | 188 |

|         |         |        |          |     |     |     |     |     |
|---------|---------|--------|----------|-----|-----|-----|-----|-----|
| 3035877 | 5035957 | 98.148 | 3.90E-75 | 283 | 40  | 201 | 3   | 164 |
| 106254  | 962596  | 97.436 | 1.63E-29 | 132 | 221 | 298 | 91  | 15  |
| 254508  | 4630910 | 94.928 | 3.58E-55 | 217 | 43  | 180 | 1   | 138 |
| 339039  | 1311273 | 87.421 | 3.74E-45 | 183 | 97  | 255 | 3   | 161 |
| 376827  | 4682031 | 87.121 | 5.81E-34 | 147 | 155 | 284 | 191 | 62  |
| 385579  | 1741112 | 85.401 | 6.22E-33 | 143 | 115 | 251 | 24  | 160 |
| 393996  | 4123971 | 83.465 | 1.27E-25 | 119 | 172 | 298 | 1   | 127 |
| 546907  | 1580739 | 96.97  | 3.61E-40 | 167 | 3   | 101 | 99  | 1   |
| 547855  | 5064880 | 87.059 | 8.47E-47 | 189 | 71  | 239 | 328 | 161 |
| 580884  | 4996701 | 90.604 | 6.57E-48 | 193 | 121 | 269 | 65  | 208 |
| 679159  | 4733278 | 91.176 | 1.81E-58 | 228 | 103 | 269 | 13  | 182 |
| 694936  | 4861473 | 91.096 | 5.69E-49 | 196 | 1   | 144 | 244 | 99  |
| 701190  | 4683779 | 93.171 | 3.45E-80 | 300 | 1   | 205 | 18  | 221 |
| 1006204 | 5008788 | 80.556 | 1.08E-50 | 202 | 1   | 267 | 312 | 25  |
| 1320534 | 5071644 | 96     | 1.69E-38 | 161 | 147 | 246 | 157 | 59  |
| 2022064 | 1615582 | 91.25  | 7.42E-23 | 110 | 2   | 81  | 80  | 1   |
| 2107800 | 4774566 | 91.463 | 5.89E-24 | 113 | 62  | 143 | 57  | 138 |
| 2688021 | 4628819 | 96.226 | 1.24E-94 | 348 | 20  | 231 | 212 | 1   |

---
