# Supplementary material for: Heterogeneous Evolution of Sex Chromosomes in the Torrent Frog Genus Amolops
Source: MDPI journal article supplement (doi:10.3390/ijms231911146), 2022-09-22
Supplement: s1 [file s1]

**Table S2. Summary of identification results of sex-specific markers in *Amolops* species from GBS and RAD-seq datasets (Parameters: M=2, n=1, m=2)**

| Species                   | Dataset | N Males | N Females | Sex-linked tags (SNPs) identified (XY / ZW) |                       |                     |                       |            | System |
|---------------------------|---------|---------|-----------|---------------------------------------------|-----------------------|---------------------|-----------------------|------------|--------|
|                           |         |         |           | Frequency method                            | Heterozygosity method | Sex-specific method | Total                 | Confirmed  |        |
| <i>A. chunganensis</i>    | GBS     | 12      | 8         | 736(1003)/755(1022)                         | 736(1003)/753(1020)   | 53/28               | 789(1003)/783(1022)   | 67(82)/0   | XY     |
| <i>A. jinjiangensis</i>   | GBS     | 10      | 11        | 244(395)/217(358)                           | 244(395)/217(358)     | 749/185             | 993(395)/402(358)     | 15(16)/0   | XY     |
| <i>A. jinjiangensis</i>   | RAD     | 3       | 4         | 181(264)/149(248)                           | 181(264)/149(248)     | 58254/16207         | 58435(264)/16356(248) | 23(29)/0   | XY     |
| <i>A. lifanensis</i>      | GBS     | 12      | 8         | 314(427)/350(466)                           | 314(427)/349(465)     | 197/70              | 511(427)/420(466)     | 28(31)/0   | XY     |
| <i>A. loloensis</i>       | GBS     | 9       | 11        | 392(527)/350(468)                           | 392(527)/350(468)     | 380/119             | 772(527)/469(468)     | 33(35)/0   | XY     |
| <i>A. mantzorum</i>       | GBS     | 10      | 10        | 327(407)/36(50)                             | 322(402)/36(50)       | 129/7               | 456(407)/43(50)       | 162(185)/0 | XY     |
| <i>A. sp.</i>             | GBS     | 8       | 9         | 155(203)/78(105)                            | 155(203)/78(105)      | 438/153             | 593(203)/231(105)     | 18(20)/0   | XY     |
| <i>A. sp.</i>             | RAD     | 5       | 4         | 100(154)/195(241)                           | 100(154)/195(241)     | 18657/4058          | 18757(154)/4253(241)  | 14(28)/0   | XY     |
| <i>A. tuberodepressus</i> | GBS     | 12      | 12        | 723(969)/662(908)                           | 722(968)/662(908)     | 42/514              | 765(969)/1176(908)    | 48(62)/0   | XY     |
| <i>A. wuyiensis</i>       | GBS     | 8       | 12        | 123(152)/7(8)                               | 123(152)/9(10)        | 839/62              | 962(152)/71(10)       | 58(67)/0   | XY     |
| <i>A. xinduoqiao</i>      | GBS     | 10      | 10        | 490(645)/23(30)                             | 490(645)/23(30)       | 68/20               | 558(645)/43(30)       | 307(373)/0 | XY     |
