# Supplementary material for: Heterogeneous Evolution of Sex Chromosomes in the Torrent Frog Genus Amolops
Source: MDPI journal article supplement (doi:10.3390/ijms231911146), 2022-09-22
Supplement: s1 [file s1]

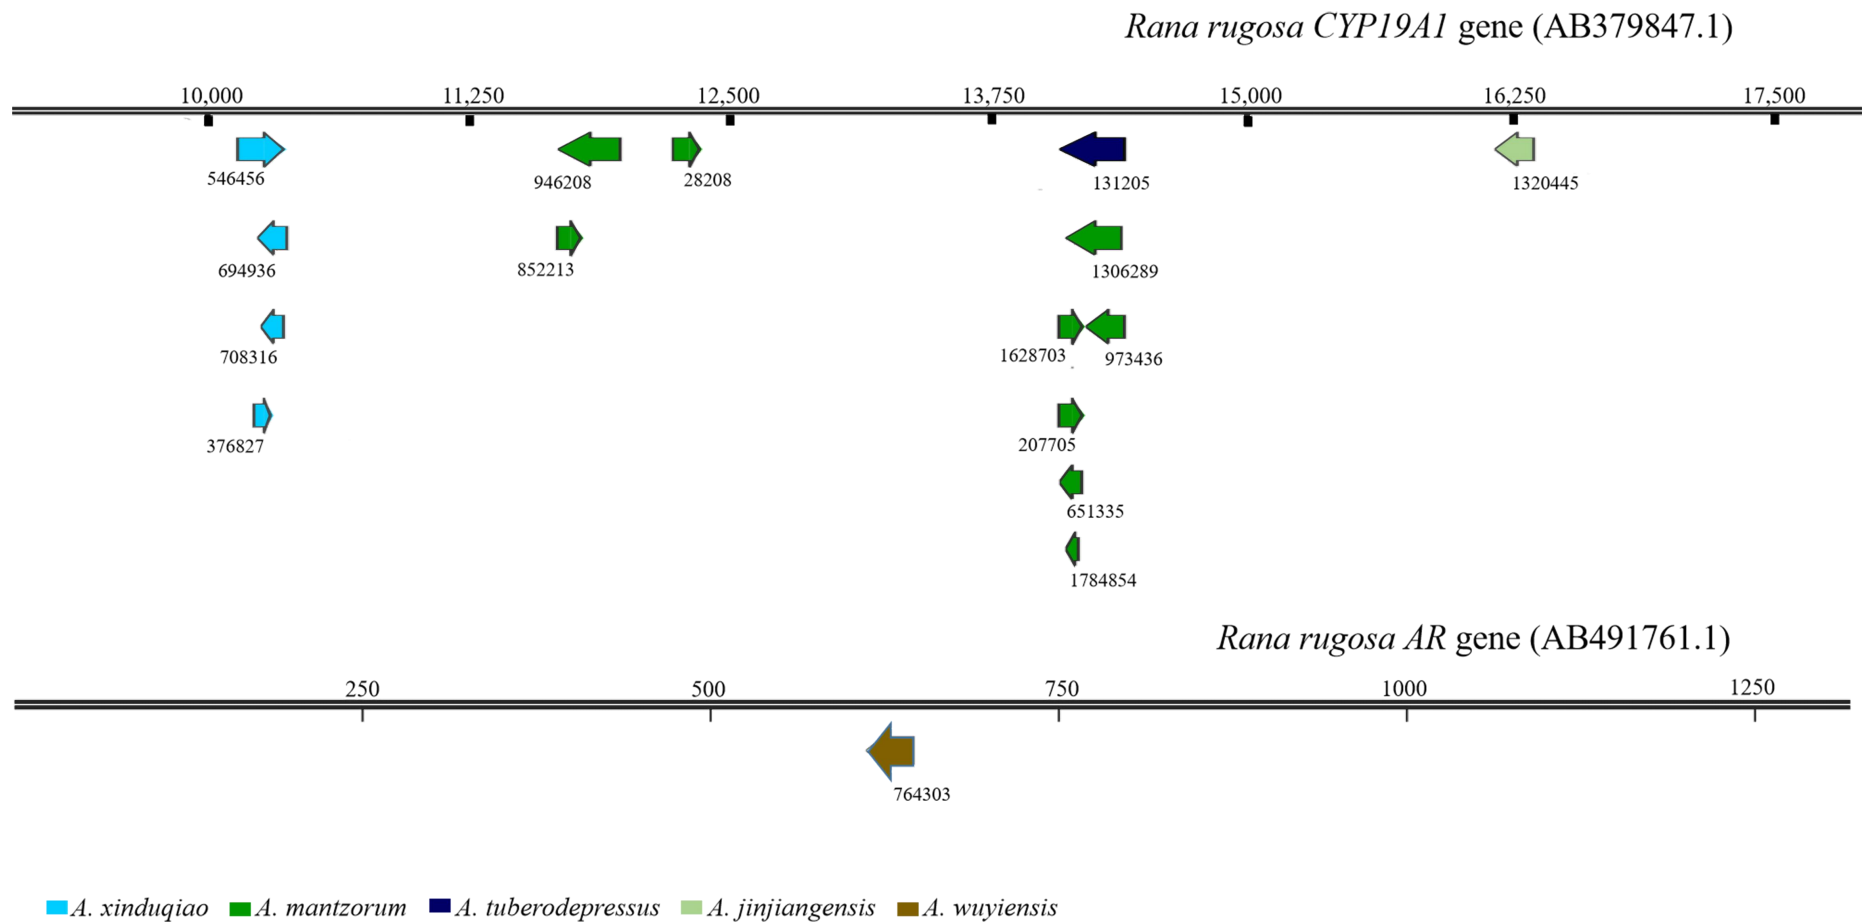

**Figure S2.** The mapping of sex-linked loci of five species of *Amolops* on *CYP19A1* and *AR* gene of *Rana rugosa*.
