# Supplementary material for: Heterogeneous Evolution of Sex Chromosomes in the Torrent Frog Genus Amolops
Source: MDPI journal article supplement (doi:10.3390/ijms231911146), 2022-09-22
Supplement: s1 [file s1]

**Table S1. Summary of identification results of sex-specific markers in *Amolops* species from GBS datasets (Optimal parameters)**

| Species                   | Dataset | N Males | N Females | Sex-linked tags (SNPs) identified (XY / ZW) |                       |                     |                   |            | System |
|---------------------------|---------|---------|-----------|---------------------------------------------|-----------------------|---------------------|-------------------|------------|--------|
|                           |         |         |           | Frequency method                            | Heterozygosity method | Sex-specific method | Total             | Confirmed  |        |
| <i>A. chunganensis</i>    | GBS     | 12      | 8         | 409(658)/479(703)                           | 409(658)/478(702)     | 22/10               | 429(658)/501(703) | 32(37)/0   | XY     |
| <i>A. jinjiangensis</i>   | GBS     | 10      | 11        | 111(177)/112(172)                           | 111(177)/112(172)     | 298/35              | 409(177)/147(172) | 10(13)/0   | XY     |
| <i>A. lifanensis</i>      | GBS     | 12      | 8         | 151(277)/203(291)                           | 151(277)/202(287)     | 47/31               | 198(277)/234(291) | 9(10)/0    | XY     |
| <i>A. loloensis</i>       | GBS     | 9       | 11        | 153(218)/144(260)                           | 153(218)/144(260)     | 108/44              | 261(218)/188(260) | 14(15)/0   | XY     |
| <i>A. mantzorum</i>       | GBS     | 10      | 10        | 209(260)/18(26)                             | 205(255)/18(26)       | 72/2                | 281(260)/20(26)   | 105(112)/0 | XY     |
| <i>A. sp.</i>             | GBS     | 8       | 9         | 60(81)/14(16)                               | 60(81)/14(16)         | 125/51              | 185/(81)/65(16)   | 6(7)/0     | XY     |
| <i>A. tuberodepressus</i> | GBS     | 12      | 12        | 451(674)/395(582)                           | 451(674)/395(582)     | 23/317              | 474(674)/712(582) | 44(53)/0   | XY     |
| <i>A. wuyiensis</i>       | GBS     | 8       | 12        | 43(52)1/(8)                                 | 42(51)/1(8)           | 304/21              | 347(52)/22(8)     | 22(25)/0   | XY     |
| <i>A. xinduqiao</i>       | GBS     | 10      | 10        | 211(304)/9(17)                              | 211(304)/9(17)        | 26/0                | 237(304)/9(17)    | 134(173)/0 | XY     |
