# Supplementary material for: Heterogeneous Evolution of Sex Chromosomes in the Torrent Frog Genus Amolops
Source: MDPI journal article supplement (doi:10.3390/ijms231911146), 2022-09-22

## File S5

Rate of aligned sex-linked markers (y axes), per reference chromosome of a third-party genome (*Pyxicephalus adspersus*, *Rana temporaria*, *Rhacophorus kio*), for 9 species of *Amolops* for which a sex chromosome could not be identified due to a lack of a clear consensus from sex linked marker alignments (Indirect positioning method or Direct positioning method). See the materials and methods in the text for details.

### Third-party genome: *Pyxicephalus adspersus* (Indirect positioning method)

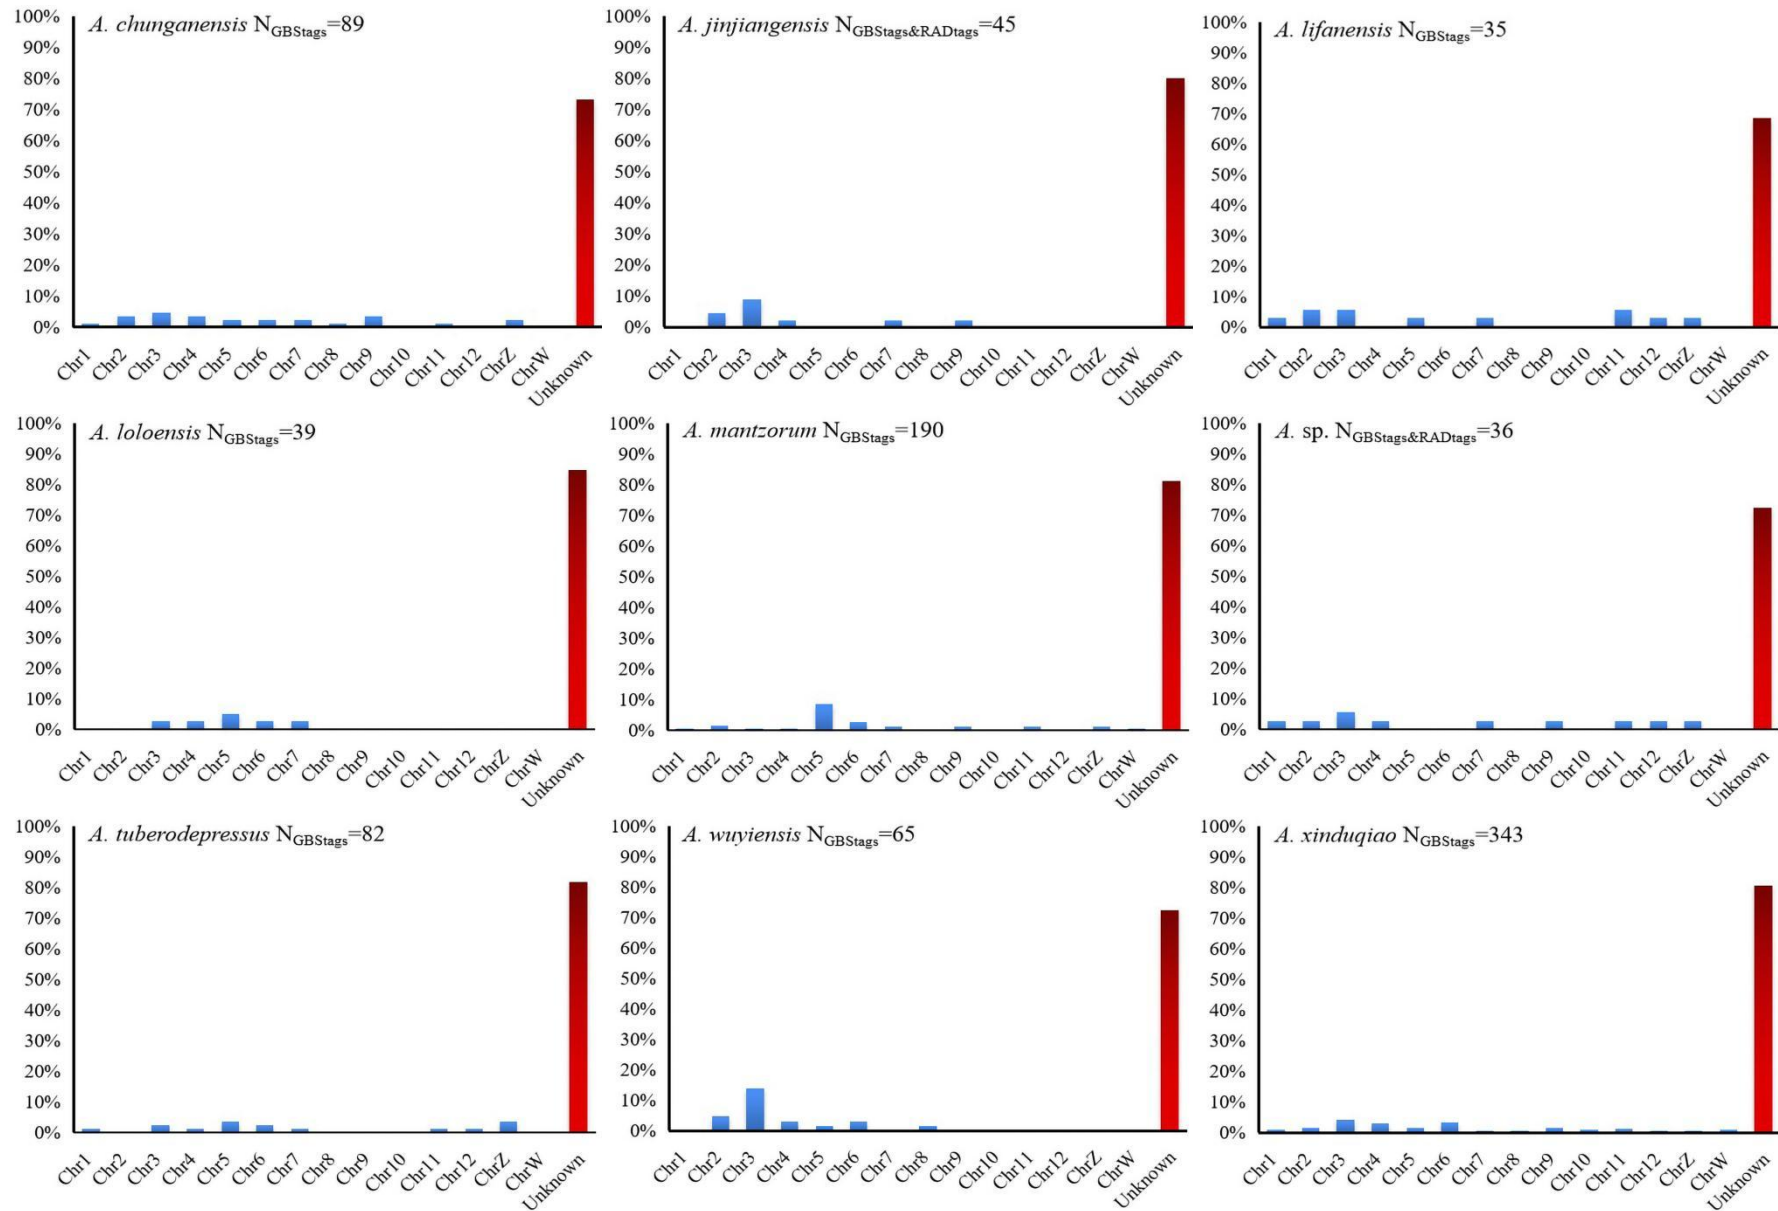

Third-party genome: *Pyxicephalus adspersus* (Direct positioning method)

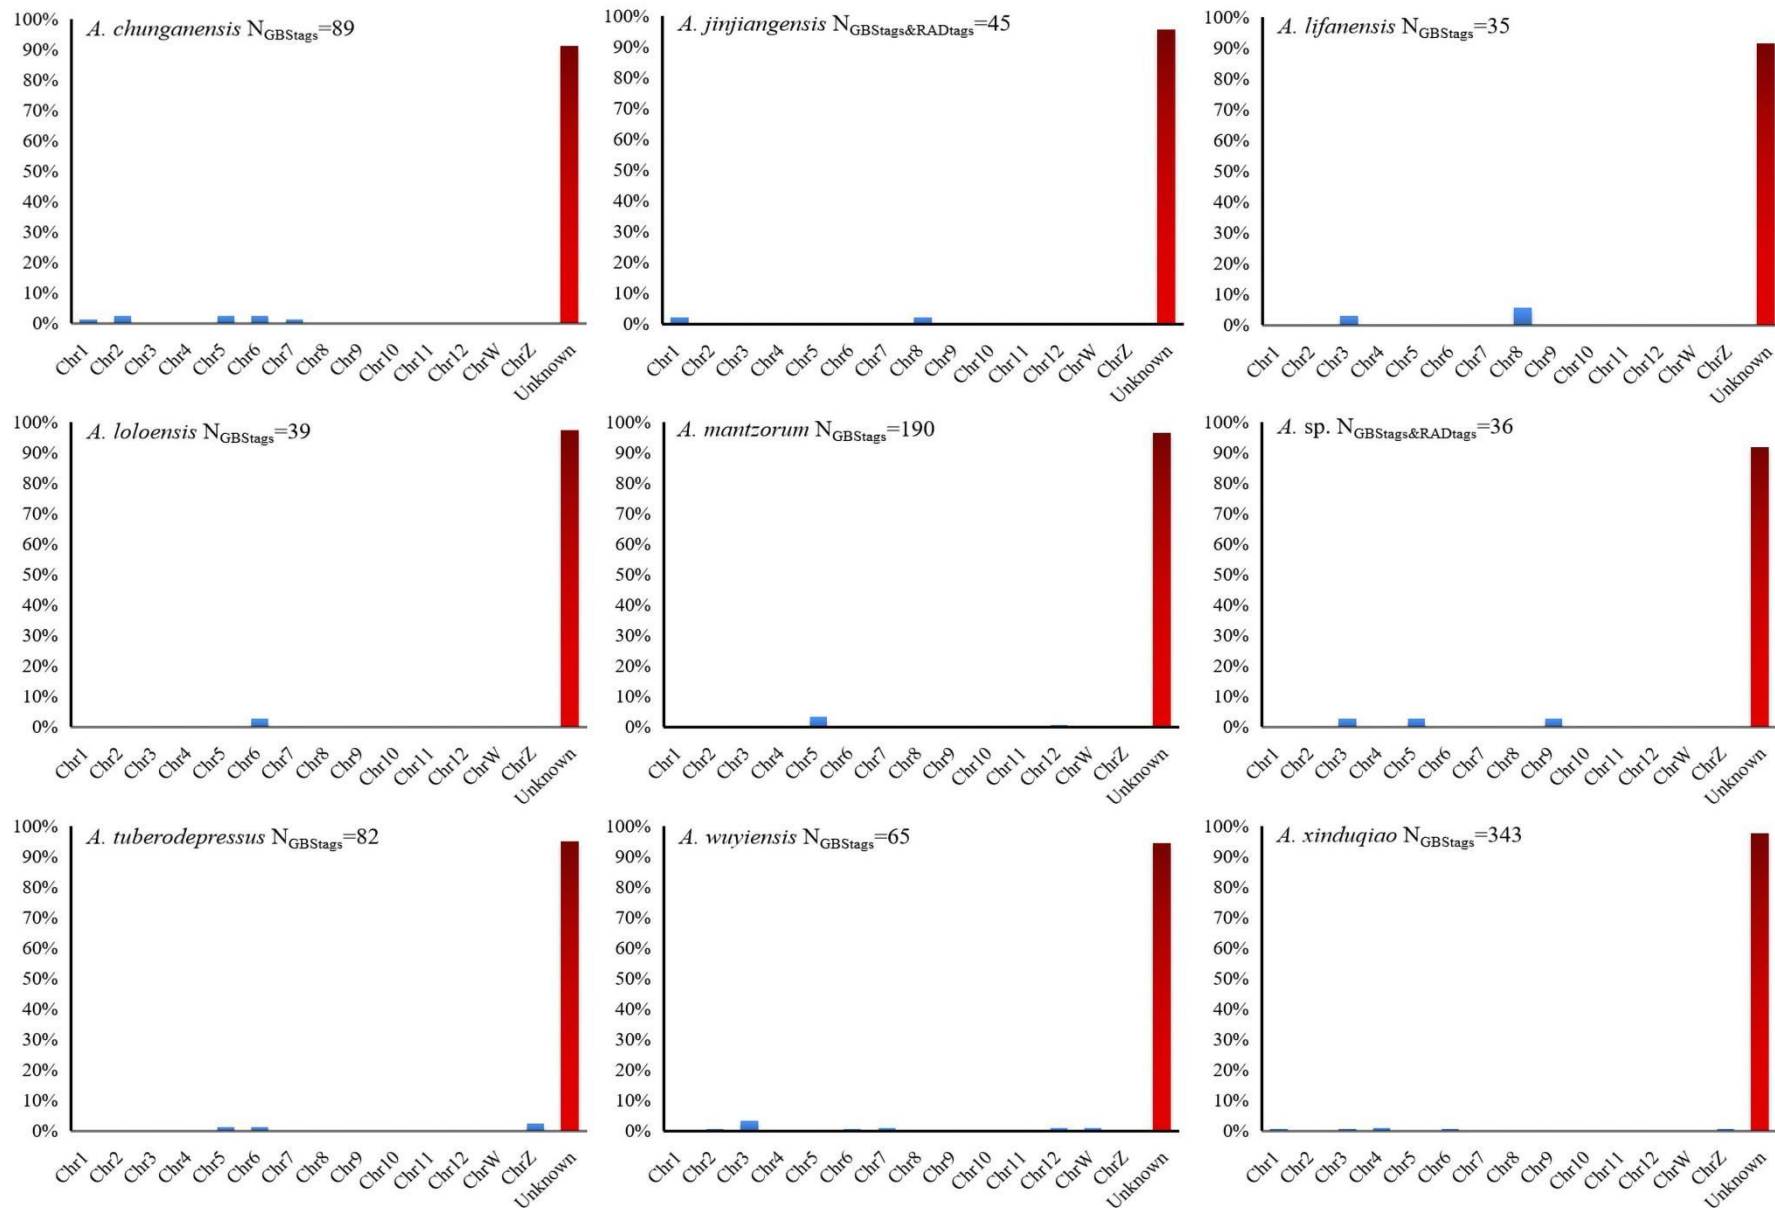

### Third-party genome: *Rana temporaria* (Direct positioning method)

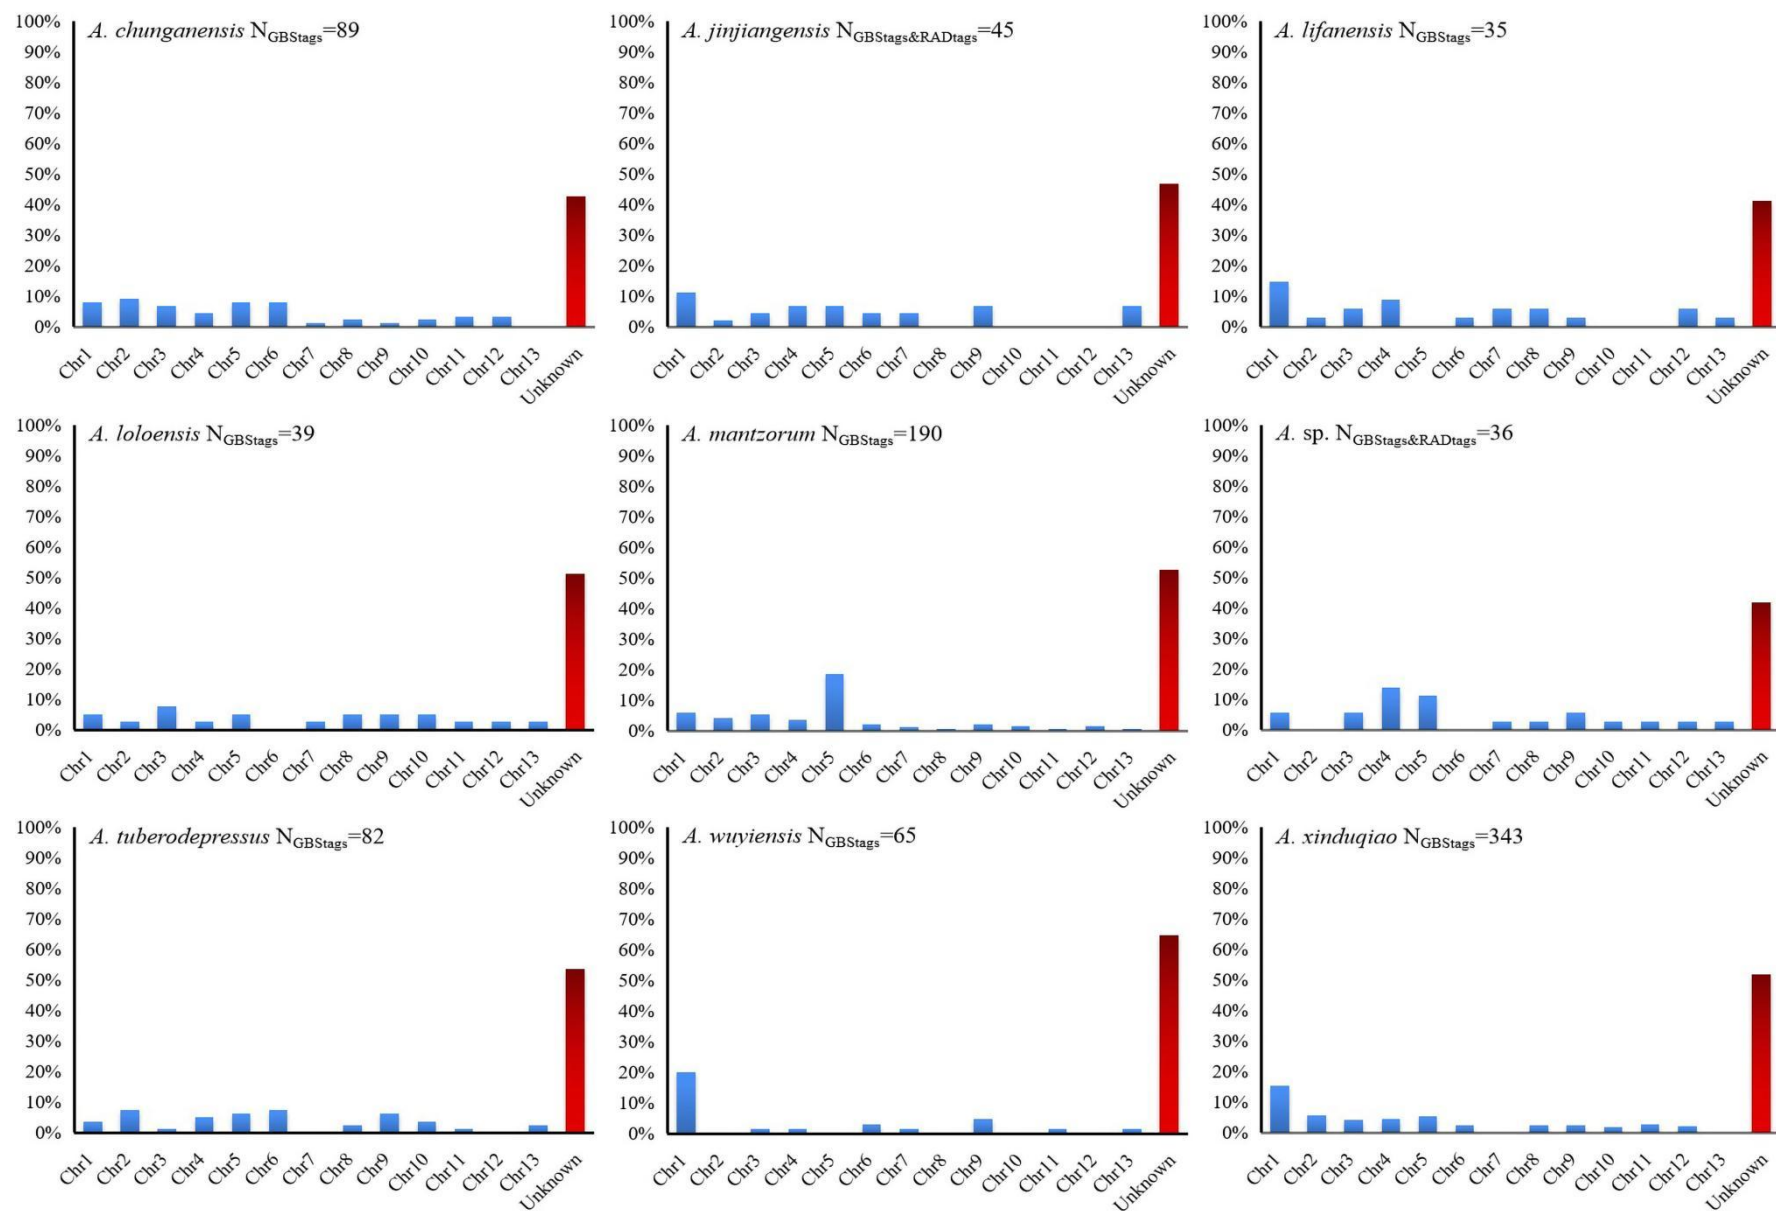

### Third-party genome: *Rhacophorus kio* (Direct positioning method)

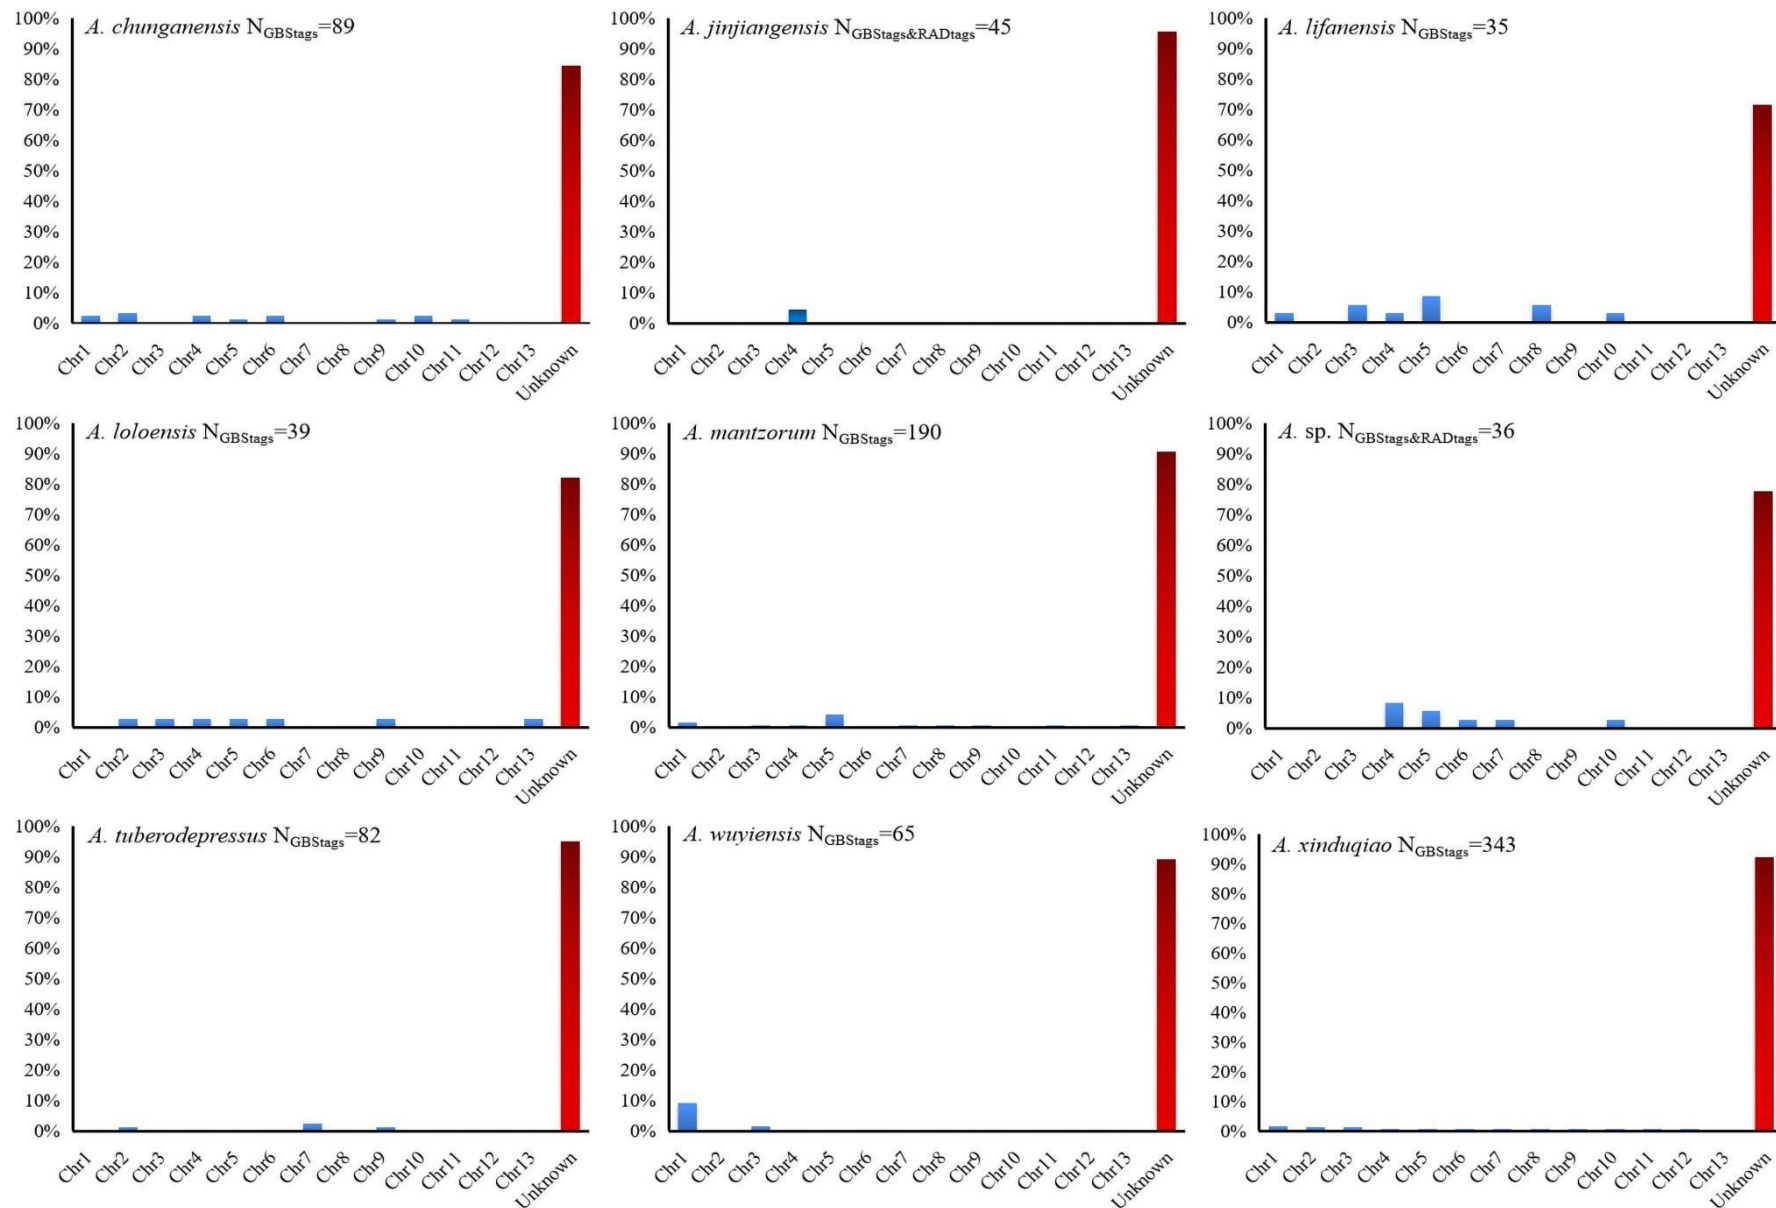

Supplement: s1 [file s1]
