# Supplementary material for: Heterogeneous Evolution of Sex Chromosomes in the Torrent Frog Genus Amolops
Source: MDPI journal article supplement (doi:10.3390/ijms231911146), 2022-09-22
Supplement: s1 [file s1]

**Table S3. Details of sequencing datasets for the nine species analysed**

| Species                   | Dataset | N Males | N Females | Sex-linked tags (SNPs) identified (XY / ZW) |                       |                     |            | N of PCR marker | System | Sex chromosome |
|---------------------------|---------|---------|-----------|---------------------------------------------|-----------------------|---------------------|------------|-----------------|--------|----------------|
|                           |         |         |           | Frequency method                            | Heterozygosity method | Sex-specific method | Confirmed  |                 |        |                |
| <i>A. chunganensis</i>    | GBS     | 12      | 8         | 1058(1554)/1155(1633)                       | 1058(1554)/1152(1630) | 75/38               | 89(108)/0  | 2               | XY     | Chr 05         |
| <i>A. jinjiangensis</i>   | GBS+RAD | 10+3    | 11+4      | 509(789)/451(748)                           | 509(789)/451(748)     | 59282/16427         | 45(113)/0  | 2               | XY     | Chr 05         |
| <i>A. lifanensis</i>      | GBS     | 12      | 8         | 436(669)/553(757)                           | 436(669)/551(752)     | 241/99              | 35(39)/0   | 3               | XY     | Chr 05         |
| <i>A. loloensis</i>       | GBS     | 9       | 11        | 526(725)/474(698)                           | 526(725)/474(698)     | 484/163             | 39(41)/0   | 1               | XY     | Chr 05         |
| <i>A. mantzorum</i>       | GBS     | 10      | 10        | 369(473)/49(71)                             | 363(467)/49(71)       | 201/9               | 190(211)/0 | 1               | XY     | Chr 05         |
| <i>A.sp.</i>              | GBS+RAD | 8+5     | 9+4       | 303(426)/285(360)                           | 303(426)/285(360)     | 19217/4261          | 36(53)/0   | 5               | XY     | Chr 05         |
| <i>A. tuberodepressus</i> | GBS     | 12      | 12        | 1095(1556)/990(1405)                        | 1094(1555)/990(1405)  | 65/831              | 82(104)/0  | 6               | XY     | Chr 05         |
| <i>A. wuyiensis</i>       | GBS     | 8       | 12        | 146(179)/8(16)                              | 145(178)/10(18)       | 1131/83             | 65(75)/0   | 7               | XY     | ?              |
| <i>A. xinduiqiao</i>      | GBS     | 10      | 10        | 542(729)/31(46)                             | 542(729)/31(46)       | 90/20               | 343(423)/0 | 3               | XY     | Chr 05         |
