# Supplementary material for: Heterogeneous Evolution of Sex Chromosomes in the Torrent Frog Genus Amolops
Source: MDPI journal article supplement (doi:10.3390/ijms231911146), 2022-09-22
Supplement: s1 [file s1]

## File S1

Quality summary of *Amolops* by GBS or RAD sequencing. 182 individuals of 9 *Amolops* species of *A. chunganensis*, *A. jinjiangensis*, *A. lifanensis*, *A. loloensis*, *A. mantzorum*, *A. sp.*, *A. tuberodepressus*, *A. wuyiensis*, *A. xinduqiao* were sequenced by GBS. At the same time, *A. jinjiangensis* and *A.sp.* were sequenced by RAD. The results after quality control of each species data were shown below. The results in Table S6 were cited from Luo et al. 2020 [34].

**Table S1. Quality summary of *A. chunganensis* (12♂, 8 ♀) by GBS sequencing**

| Serial | Sample    | Raw Base(bp)  | Clean Base(bp) | Effective Rate(%) | Error Rate(%) | Q20(%) | Q30(%) | GC Content(%) |
|--------|-----------|---------------|----------------|-------------------|---------------|--------|--------|---------------|
| 1      | xm5435M   | 2,306,490,624 | 2,306,469,888  | 100.00            | 0.04          | 96.66  | 91.13  | 43.55         |
| 2      | xm5436M   | 2,275,203,168 | 2,275,186,176  | 100.00            | 0.04          | 96.41  | 90.62  | 44.33         |
| 3      | xm5437M   | 2,240,751,456 | 2,240,728,992  | 100.00            | 0.04          | 95.97  | 89.37  | 44.52         |
| 4      | xm5439M   | 2,684,068,128 | 2,684,040,768  | 100.00            | 0.04          | 97.27  | 92.56  | 44.64         |
| 5      | xm5440M   | 2,238,629,184 | 2,238,607,584  | 100.00            | 0.04          | 96.46  | 90.73  | 43.67         |
| 6      | xm5441M   | 2,400,928,416 | 2,400,906,816  | 100.00            | 0.04          | 96.86  | 91.67  | 44.05         |
| 7      | xm5442M   | 2,509,143,840 | 2,509,117,632  | 100.00            | 0.04          | 96.62  | 91.10  | 43.84         |
| 8      | xm5443M   | 1,815,708,960 | 1,815,708,960  | 100.00            | 0.04          | 96.28  | 90.16  | 43.23         |
| 9      | xm5444M   | 2,399,499,936 | 2,399,480,064  | 100.00            | 0.04          | 96.01  | 89.62  | 43.64         |
| 10     | xm140823M | 2,199,256,992 | 2,199,239,136  | 100.00            | 0.04          | 96.44  | 90.59  | 44.25         |
| 11     | xm140824M | 2,682,247,680 | 2,682,221,760  | 100.00            | 0.04          | 96.21  | 90.09  | 43.95         |
| 12     | xm140825M | 2,093,039,424 | 2,093,019,264  | 100.00            | 0.04          | 96.35  | 90.58  | 42.74         |
| 13     | xm5449F   | 2,299,457,664 | 2,299,436,640  | 100.00            | 0.04          | 95.90  | 89.35  | 44.64         |
| 14     | xm5453F   | 1,729,766,016 | 1,729,747,296  | 100.00            | 0.04          | 95.94  | 89.37  | 44.34         |
| 15     | xm5526F   | 2,290,128,768 | 2,290,108,608  | 100.00            | 0.04          | 96.33  | 90.44  | 44.49         |
| 16     | xm5527F   | 2,325,840,480 | 2,325,821,184  | 100.00            | 0.04          | 96.81  | 91.70  | 44.50         |
| 17     | xm5528F   | 1,682,022,816 | 1,682,007,840  | 100.00            | 0.04          | 96.50  | 90.85  | 44.12         |
| 18     | xm5530F   | 2,161,843,776 | 2,161,824,192  | 100.00            | 0.04          | 96.40  | 90.68  | 44.22         |
| 19     | xm5532F   | 2,139,924,096 | 2,139,906,816  | 100.00            | 0.04          | 97.00  | 92.15  | 44.23         |
| 20     | xm140821F | 2,702,542,176 | 2,702,520,576  | 100.00            | 0.04          | 96.35  | 90.45  | 43.28         |

**Table S2. Quality summary of *A. jinjiangensis* (10♂, 11♀) by GBS sequencing**

| Serial | Sample  | Raw Base(bp)  | Clean Base(bp) | Effective Rate(%) | Error Rate(%) | Q20(%) | Q30(%) | GC Content(%) |
|--------|---------|---------------|----------------|-------------------|---------------|--------|--------|---------------|
| 1      | xm6119M | 877,166,496   | 877,131,072    | 100.00            | 0.03          | 96.45  | 90.87  | 45.11         |
| 2      | xm6124M | 1,035,772,128 | 1,035,730,656  | 100.00            | 0.03          | 96.7   | 91.66  | 44.89         |
| 3      | xm6153M | 1,152,000,000 | 1,151,999,712  | 100.00            | 0.03          | 95.55  | 88.89  | 43.87         |
| 4      | xm6155M | 1,399,402,368 | 1,399,361,760  | 100.00            | 0.03          | 96.15  | 90.03  | 44.35         |
| 5      | xm6159M | 1,161,335,520 | 1,161,327,168  | 100.00            | 0.03          | 96.06  | 89.8   | 45.01         |
| 6      | xm6160M | 1,276,088,256 | 1,276,082,784  | 100.00            | 0.03          | 96.06  | 89.77  | 44.76         |
| 7      | xm6161M | 1,141,169,184 | 1,141,159,680  | 100.00            | 0.03          | 96.44  | 90.9   | 45.02         |
| 8      | xm6170M | 1,473,136,128 | 1,473,092,928  | 100.00            | 0.03          | 96.94  | 91.83  | 45.21         |
| 9      | xm6172M | 1,653,977,952 | 1,653,977,952  | 100.00            | 0.03          | 96.17  | 89.88  | 44.96         |
| 10     | xm6176M | 1,529,795,808 | 1,529,707,968  | 99.99             | 0.03          | 96.36  | 90.04  | 42.76         |
| 11     | xm6107F | 1,118,068,704 | 1,118,056,320  | 100.00            | 0.03          | 96.33  | 90.66  | 43.82         |
| 12     | xm6111F | 1,207,668,384 | 1,207,658,592  | 100.00            | 0.03          | 96.22  | 90.3   | 44.67         |
| 13     | xm6118F | 1,082,835,360 | 1,082,826,720  | 100.00            | 0.03          | 96.36  | 90.82  | 43.92         |
| 14     | xm6120F | 896,832,288   | 896,827,680    | 100.00            | 0.03          | 96.04  | 89.65  | 45.22         |
| 15     | xm6121F | 1,297,513,152 | 1,294,132,320  | 99.74             | 0.03          | 95.39  | 88.28  | 44.28         |
| 16     | xm6129F | 1,046,285,568 | 1,046,276,640  | 100.00            | 0.03          | 96.73  | 91.66  | 44.92         |
| 17     | xm6145F | 1,165,754,304 | 1,165,741,344  | 100.00            | 0.03          | 97.15  | 92.49  | 44.84         |
| 18     | xm6151F | 1,215,546,048 | 1,215,508,320  | 100.00            | 0.03          | 96.43  | 90.63  | 44.04         |
| 19     | xm6154F | 1,315,939,968 | 1,315,865,376  | 100.00            | 0.03          | 95.31  | 87.50  | 42.98         |
| 20     | xm6157F | 1,411,365,888 | 1,411,365,888  | 99.99             | 0.03          | 97.09  | 91.77  | 43.19         |
| 21     | xm6158F | 1,874,589,696 | 1,874,539,872  | 100.00            | 0.03          | 95.22  | 87.40  | 45.20         |

**Table S3. Quality summary of *A. jinjiangensis* (3♂, 4♀) by RAD sequencing**

| Serial | Sample  | Raw Base(bp)   | Clean Base(bp) | Effective Rate(%) | Error Rate(%) | Q20(%) | Q30(%) | GC Content(%) |
|--------|---------|----------------|----------------|-------------------|---------------|--------|--------|---------------|
| 1      | xm6119M | 9,953,211,300  | 9,577,712,400  | 96.23             | 0.03          | 96.48  | 91.92  | 43.37         |
| 2      | xm6153M | 8116745400     | 7749117600     | 95.55             | 0.03          | 96.655 | 92.38  | 42.94         |
| 3      | xm6155M | 16960781100    | 16332300600    | 96.345            | 0.03          | 96.69  | 92.495 | 43            |
| 4      | xm6107F | 9,698,685,600  | 9,640,968,000  | 99.40             | 0.03          | 96.55  | 91.88  | 42.27         |
| 5      | xm6111F | 10,568,827,800 | 10,222,118,400 | 96.72             | 0.03          | 96.47  | 91.88  | 43.16         |
| 6      | xm6120F | 9,549,554,700  | 9,272,001,300  | 97.09             | 0.03          | 96.70  | 92.40  | 42.84         |
| 7      | xm6151F | 9,073,832,100  | 8,784,897,300  | 96.82             | 0.03          | 96.51  | 91.99  | 42.92         |

Table S4. Quality summary of *A. lifanensis* (12♂, 8♀) by GBS sequencing

| Serial | Sample  | Raw Base(bp)  | Clean Base(bp) | Effective Rate(%) | Error Rate(%) | Q20(%) | Q30(%) | GC Content(%) |
|--------|---------|---------------|----------------|-------------------|---------------|--------|--------|---------------|
| 1      | xm6846M | 1,800,781,056 | 1,800,765,216  | 100.00            | 0.04          | 96.66  | 91.33  | 44.28         |
| 2      | xm6847M | 2,751,852,096 | 2,751,828,192  | 100.00            | 0.04          | 95.61  | 88.67  | 43.55         |
| 3      | xm6848M | 2,264,932,512 | 2,264,916,384  | 100.00            | 0.04          | 96.02  | 89.69  | 44.41         |
| 4      | xm6850M | 1,319,464,800 | 1,319,450,976  | 100.00            | 0.04          | 95.53  | 88.51  | 44.31         |
| 5      | xm6851M | 1,460,547,072 | 1,460,533,248  | 100.00            | 0.04          | 96.82  | 91.75  | 43.89         |
| 6      | xm6852M | 1,401,891,264 | 1,401,873,984  | 100.00            | 0.04          | 97.06  | 92.34  | 44.18         |
| 7      | xm6853M | 1,174,681,440 | 1,174,671,360  | 100.00            | 0.04          | 96.38  | 90.52  | 44.27         |
| 8      | xm6854M | 2,019,220,992 | 2,019,203,424  | 100.00            | 0.04          | 96.43  | 90.75  | 43.97         |
| 9      | xm6855M | 1,514,399,616 | 1,514,386,944  | 100.00            | 0.04          | 95.96  | 89.50  | 44.36         |
| 10     | xm6856M | 1,469,077,344 | 1,469,066,112  | 100.00            | 0.05          | 95.35  | 88.15  | 43.78         |
| 11     | xm6857M | 1,720,708,416 | 1,720,692,576  | 100.00            | 0.04          | 96.30  | 90.38  | 43.36         |
| 12     | xm6864M | 1,575,340,704 | 1,575,326,592  | 100.00            | 0.04          | 95.93  | 89.39  | 44.27         |
| 13     | xm6428F | 1,007,706,528 | 1,007,693,568  | 100.00            | 0.04          | 95.94  | 89.66  | 42.39         |
| 14     | xm6431F | 1,674,021,312 | 1,674,004,320  | 100.00            | 0.04          | 96.24  | 90.13  | 43.55         |
| 15     | xm6436F | 1,408,682,880 | 1,408,666,464  | 100.00            | 0.04          | 95.86  | 89.39  | 43.51         |
| 16     | xm6437F | 961,500,960   | 961,490,304    | 100.00            | 0.04          | 96.18  | 90.19  | 42.41         |
| 17     | xm6849F | 1,497,127,392 | 1,497,111,840  | 100.00            | 0.04          | 96.31  | 90.44  | 44.20         |
| 18     | xm6867F | 1,463,322,816 | 1,463,307,264  | 100.00            | 0.05          | 94.62  | 86.27  | 43.92         |
| 19     | xm6878F | 1,701,377,856 | 1,701,362,592  | 100.00            | 0.04          | 96.41  | 90.67  | 43.61         |
| 20     | xm6892F | 1,788,377,760 | 1,788,361,920  | 100.00            | 0.04          | 96.53  | 90.90  | 43.96         |

**Table S5. Quality summary of *A. loloensis* (9♂, 11♀) by GBS sequencing**

| Serial | Sample  | Raw Base(bp)  | Clean Base(bp) | Effective Rate(%) | Error Rate(%) | Q20(%) | Q30(%) | GC Content(%) |
|--------|---------|---------------|----------------|-------------------|---------------|--------|--------|---------------|
| 1      | xm5561M | 1,574,412,480 | 1,570,237,632  | 99.73             | 0.03          | 94.7   | 86.62  | 44.52         |
| 2      | xm5562M | 1,152,000,000 | 1,151,969,472  | 100               | 0.04          | 95.45  | 88.64  | 44.88         |
| 3      | xm5573M | 1,337,913,216 | 1,334,431,872  | 99.74             | 0.03          | 94.66  | 86.44  | 45            |
| 4      | xm5575M | 1,152,000,000 | 1,151,976,672  | 100               | 0.03          | 95.86  | 89.48  | 43.88         |
| 5      | xm5579M | 1,490,229,792 | 1,486,305,792  | 99.74             | 0.04          | 94.04  | 85.24  | 45.3          |
| 6      | xm5581M | 1,152,000,000 | 1,151,972,352  | 100               | 0.03          | 96.47  | 90.74  | 44.35         |
| 7      | xm5585M | 1,152,000,000 | 1,151,978,400  | 100               | 0.03          | 95.75  | 89.31  | 43.91         |
| 8      | xm5586M | 1,286,776,224 | 1,283,204,448  | 99.72             | 0.03          | 96     | 89.62  | 45.14         |
| 9      | xm5592M | 1,380,684,384 | 1,376,929,728  | 99.73             | 0.03          | 96.25  | 90.22  | 45            |
| 10     | xm5560F | 1,517,094,144 | 1,512,796,320  | 99.72             | 0.03          | 95.5   | 88.47  | 45.42         |
| 11     | xm5572F | 1,276,113,312 | 1,272,819,456  | 99.74             | 0.03          | 94.73  | 86.6   | 45.2          |
| 12     | xm5574F | 1,152,000,000 | 1,152,000,000  | 100               | 0.03          | 95.95  | 89.64  | 43.83         |
| 13     | xm5576F | 1,628,385,984 | 1,624,127,040  | 99.74             | 0.03          | 95.37  | 88.13  | 45.09         |
| 14     | xm5577F | 1,446,447,456 | 1,442,570,688  | 99.73             | 0.03          | 94.65  | 86.47  | 45.36         |
| 15     | xm5578F | 1,152,000,000 | 1,151,97,4080  | 100               | 0.03          | 95.64  | 89.03  | 44.34         |
| 16     | xm5580F | 1,152,000,000 | 1,151,966,304  | 100               | 0.04          | 95.06  | 87.72  | 44.77         |
| 17     | xm5584F | 1,511,993,376 | 1,508,133,024  | 99.74             | 0.03          | 95.38  | 88.13  | 45.02         |
| 18     | xm5587F | 1,350,221,184 | 1,346,569,344  | 99.73             | 0.03          | 95.5   | 88.42  | 45.12         |
| 19     | xm5591F | 1,466,617,248 | 1,462,538,592  | 99.72             | 0.03          | 95.71  | 88.94  | 45.06         |
| 20     | xm5593F | 1,460,370,528 | 1,456,305,120  | 99.72             | 0.03          | 95.42  | 88.28  | 45            |

**Table S6. Quality summary of *A. mantzorum* (10♂, 10♀) by GBS sequencing (Cite from: Luo et al. 2020) [34]**

| Serial | Sample  | Raw Base(bp)  | Clean Base(bp) | Effective Rate(%) | Error Rate(%) | Q20(%) | Q30(%) | GC Content(%) |
|--------|---------|---------------|----------------|-------------------|---------------|--------|--------|---------------|
| 1      | xm5419M | 1,115,742,816 | 944,460,576    | 84.65             | 0.04          | 94.39  | 86.31  | 44.22         |
| 2      | xm5505M | 1,235,666,304 | 1,129,111,200  | 91.38             | 0.04          | 94.51  | 86.02  | 43.11         |
| 3      | xm5506M | 1,362,431,232 | 1,142,590,464  | 83.86             | 0.04          | 94.1   | 85.74  | 44.33         |
| 4      | xm5509M | 1,405,836,288 | 1,280,830,176  | 91.11             | 0.04          | 94.32  | 85.68  | 43.16         |
| 5      | xm5510M | 1,183,251,744 | 969,465,024    | 81.93             | 0.04          | 93.27  | 84.06  | 44.49         |
| 6      | xm5550M | 918,683,424   | 839,546,784    | 91.39             | 0.04          | 94.84  | 86.75  | 44.25         |
| 7      | xm5551M | 991,366,560   | 795,010,464    | 80.19             | 0.04          | 92.48  | 82.41  | 44.66         |
| 8      | xm5553M | 1,378,397,952 | 1,088,229,888  | 78.95             | 0.04          | 91.9   | 81.28  | 44.23         |
| 9      | xm5767M | 894,136,896   | 668,430,720    | 74.76             | 0.06          | 90.31  | 78.15  | 44.33         |
| 10     | xm5768M | 1,329,713,568 | 1,088,465,184  | 81.86             | 0.04          | 93.2   | 83.93  | 44.33         |
| 11     | xm5418F | 1,048,606,848 | 945,563,328    | 90.17             | 0.04          | 94     | 85.06  | 42.76         |
| 12     | xm5501F | 774,791,712   | 692,184,384    | 89.34             | 0.04          | 93.61  | 84.09  | 44.47         |
| 13     | xm5502F | 1,004,658,048 | 908,922,240    | 90.47             | 0.04          | 94.1   | 85.19  | 44.22         |
| 14     | xm5503F | 1,241,951,040 | 1,007,745,120  | 81.14             | 0.04          | 93.15  | 83.69  | 44.7          |
| 15     | xm5766F | 1,343,048,544 | 1,203,297,696  | 89.59             | 0.04          | 93.61  | 84.19  | 44.41         |
| 16     | xm5793F | 967,158,720   | 863,706,240    | 89.3              | 0.04          | 93.35  | 83.61  | 44.2          |
| 17     | xm5799F | 448,333,056   | 401,740,416    | 89.61             | 0.04          | 93.67  | 84.38  | 42.42         |
| 18     | xm5841F | 994,315,680   | 903,437,280    | 90.86             | 0.04          | 94.2   | 85.38  | 43.86         |
| 19     | xm5842F | 1,237,210,560 | 1,123,719,840  | 90.83             | 0.04          | 94.23  | 85.44  | 44.01         |
| 20     | xm5843F | 862,236,288   | 772,805,664    | 89.63             | 0.04          | 93.48  | 83.92  | 43.45         |

**Table S7. Quality summary of *A. mantzorum* (10♂, 10♀) by GBS sequencing**

| Serial | Sample  | Raw Base(bp)  | Clean Base(bp) | Effective Rate(%) | Error Rate(%) | Q20(%) | Q30(%) | GC Content(%) |
|--------|---------|---------------|----------------|-------------------|---------------|--------|--------|---------------|
| 1      | xm5419M | 1,950,262,272 | 1,893,243,168  | 97.08             | 0.04          | 94.17  | 85.75  | 44.21         |
| 2      | xm5505M | 1,485,036,000 | 1,429,529,472  | 96.26             | 0.04          | 94.55  | 86.59  | 44.40         |
| 3      | xm5506M | 2,053,156,896 | 2,008,155,744  | 97.81             | 0.04          | 94.38  | 85.72  | 44.30         |
| 4      | xm5509M | 2,095,875,072 | 2,007,452,160  | 95.78             | 0.03          | 96.13  | 90.03  | 44.46         |
| 5      | xm5510M | 2,034,360,576 | 1,930,174,560  | 94.88             | 0.03          | 96.39  | 90.62  | 44.48         |
| 6      | xm5550M | 1,925,852,544 | 1,863,956,160  | 96.79             | 0.03          | 95.42  | 88.13  | 44.42         |
| 7      | xm5551M | 1,885,178,880 | 1,823,272,416  | 96.72             | 0.03          | 95.64  | 88.76  | 44.25         |
| 8      | xm5553M | 2,161,293,120 | 2,108,211,552  | 97.54             | 0.03          | 94.77  | 86.56  | 44.55         |
| 9      | xm5767M | 2,732,696,352 | 2,674,291,104  | 97.86             | 0.04          | 94.14  | 85.24  | 44.22         |
| 10     | xm5768M | 2,497,263,264 | 2,441,994,624  | 97.79             | 0.03          | 95.56  | 88.50  | 44.03         |
| 11     | xm5418F | 1,535,963,040 | 1,493,069,760  | 97.21             | 0.04          | 94.38  | 86.01  | 43.88         |
| 12     | xm5501F | 1,436,913,792 | 1,395,181,440  | 97.10             | 0.04          | 93.93  | 85.02  | 44.19         |
| 13     | xm5502F | 1,188,155,232 | 1,145,865,888  | 96.44             | 0.04          | 93.98  | 85.13  | 44.22         |
| 14     | xm5503F | 1,456,224,480 | 1,403,925,696  | 96.41             | 0.04          | 94.60  | 86.66  | 44.22         |
| 15     | xm5766F | 1,402,211,520 | 1,346,807,520  | 96.05             | 0.03          | 95.24  | 88.16  | 44.23         |
| 16     | xm5793F | 1,749,920,832 | 1,701,066,240  | 97.21             | 0.04          | 94.87  | 87.24  | 44.14         |
| 17     | xm5799F | 1,676,654,208 | 1,636,010,208  | 97.58             | 0.04          | 94.85  | 87.22  | 44.04         |
| 18     | xm5841F | 2,085,861,024 | 2,015,131,680  | 96.61             | 0.03          | 95.47  | 88.66  | 44.10         |
| 19     | xm5842F | 1,720,643,040 | 1,666,523,808  | 96.85             | 0.03          | 95.02  | 87.65  | 44.26         |
| 20     | xm5843F | 2,191,070,016 | 2,152,321,344  | 98.23             | 0.04          | 93.77  | 84.75  | 43.98         |



**Table S8. Summary of GBS sequencing quality for *A. sp.* (8♂, 9♀)**

| Serial | Sample  | Raw Base(bp) | Clean Base(bp) | Effective Rate(%) | Error Rate(%) | Q20(%) | Q30(%) | GC Content(%) |
|--------|---------|--------------|----------------|-------------------|---------------|--------|--------|---------------|
| 1      | xm5850M | 1552468320   | 1548288864     | 99.73             | 0.03          | 95.23  | 87.88  | 45.23         |
| 2      | xm5859M | 1535858496   | 1531671552     | 99.73             | 0.03          | 96.22  | 90.13  | 44.86         |
| 3      | xm5861M | 1152000000   | 1151979552     | 100               | 0.03          | 95.63  | 89.06  | 44.21         |
| 4      | xm5878M | 1152000000   | 1151980992     | 100               | 0.03          | 95.64  | 89.06  | 44.43         |
| 5      | xm6844M | 1346936832   | 1343374272     | 99.74             | 0.04          | 94.34  | 85.77  | 45.12         |
| 6      | xm6860M | 1152000000   | 1151975232     | 100               | 0.04          | 95.2   | 88.06  | 44.49         |
| 7      | xm6861M | 1152000000   | 1151999712     | 100               | 0.04          | 95.23  | 88.11  | 44.62         |
| 8      | xm6862M | 1473472224   | 1469464992     | 99.73             | 0.03          | 94.41  | 86.03  | 45.39         |
| 9      | xm5849F | 1152000000   | 1151965728     | 100               | 0.03          | 95.73  | 89.26  | 44.75         |
| 10     | xm5857F | 1326930912   | 1323632736     | 99.75             | 0.04          | 92.53  | 82.12  | 45.33         |
| 11     | xm5858F | 1515288096   | 1511348832     | 99.74             | 0.04          | 93.88  | 84.94  | 45.05         |
| 12     | xm5860F | 1152000000   | 1151978112     | 100               | 0.03          | 96.06  | 90.03  | 44.45         |
| 13     | xm5869F | 1462565664   | 1458739008     | 99.74             | 0.03          | 95.6   | 88.66  | 45            |
| 14     | xm6842F | 1152000000   | 1151999424     | 100               | 0.03          | 96.19  | 90.25  | 44.09         |
| 15     | xm6843F | 1152000000   | 1151999712     | 100               | 0.03          | 95.93  | 89.67  | 44.23         |
| 16     | xm6858F | 1152000000   | 1152000000     | 100               | 0.04          | 95.46  | 88.62  | 43.34         |
| 17     | xm6859F | 1152000000   | 1152000000     | 100               | 0.04          | 95.3   | 88.22  | 43.94         |

**Table S9. Summary of RAD-seq quality for *A. sp.* (5♂, 4♀)**

| Serial | Sample  | Raw Base(bp)   | Clean Base(bp) | Effective Rate(%) | Error Rate(%) | Q20(%) | Q30(%) | GC Content(%) |
|--------|---------|----------------|----------------|-------------------|---------------|--------|--------|---------------|
| 1      | xm5850M | 11789933400    | 11492266500    | 97.575            | 0.03          | 96.07  | 91.28  | 42.56         |
| 2      | xm5859M | 12,578,748,900 | 12,390,646,200 | 98.50             | 0.03          | 96.88  | 92.59  | 42.20         |
| 3      | xm5861M | 11,180,502,000 | 10,989,065,700 | 98.29             | 0.03          | 96.99  | 92.86  | 42.14         |
| 4      | xm6844M | 8,825,242,500  | 8,674,115,700  | 98.29             | 0.03          | 96.90  | 92.66  | 42.23         |
| 5      | xm6860M | 10,371,290,400 | 10,303,875,600 | 99.35             | 0.03          | 96.50  | 91.78  | 42.26         |
| 6      | xm5858F | 9570614700     | 9343718100     | 97.8              | 0.03          | 95.86  | 90.435 | 42.68         |
| 7      | xm5860F | 8596305900     | 8375899800     | 97.545            | 0.03          | 95.745 | 90.295 | 42.715        |
| 8      | xm6858F | 13220097900    | 12969348600    | 98.175            | 0.03          | 95.725 | 90.215 | 42.8          |
| 9      | xm6859F | 8512762200     | 8276329200     | 97.36             | 0.03          | 96.07  | 91.215 | 42.46         |

**Table S10. Quality summary of *A. tuberosus* (12♂, 12♀) by GBS sequencing**

| Serial | Sample  | Raw Base(bp)  | Clean Base(bp) | Effective Rate(%) | Error Rate(%) | Q20(%) | Q30(%) | GC Content(%) |
|--------|---------|---------------|----------------|-------------------|---------------|--------|--------|---------------|
| 1      | PJ112M  | 1,803,514,752 | 1,803,492,000  | 100.00            | 0.04          | 96.36  | 90.52  | 43.68         |
| 2      | PJ113M  | 2,128,239,072 | 2,128,216,032  | 100.00            | 0.04          | 96.24  | 90.29  | 43.52         |
| 3      | PJ117M  | 2,325,046,176 | 2,325,018,240  | 100.00            | 0.04          | 95.83  | 89.24  | 44.12         |
| 4      | PJ146M  | 1,815,201,792 | 1,815,181,344  | 100.00            | 0.04          | 97.05  | 92.05  | 43.88         |
| 5      | PJ147M  | 1,689,610,176 | 1,689,588,000  | 100.00            | 0.04          | 96.56  | 90.85  | 43.90         |
| 6      | PJ149M  | 1,188,915,840 | 1,188,899,136  | 100.00            | 0.04          | 96.47  | 90.73  | 43.34         |
| 7      | PJ150M  | 1,122,724,224 | 1,122,708,672  | 100.00            | 0.04          | 95.88  | 89.34  | 41.95         |
| 8      | PJ151M  | 1,454,503,392 | 1,454,484,960  | 100.00            | 0.04          | 95.62  | 88.80  | 42.34         |
| 9      | PJ152M  | 2,022,338,016 | 2,022,314,112  | 100.00            | 0.04          | 95.62  | 88.75  | 43.63         |
| 10     | PJ153M  | 1,960,403,040 | 1,960,380,576  | 100.00            | 0.04          | 95.61  | 88.66  | 43.22         |
| 11     | PJ154M  | 1,927,712,736 | 1,927,686,816  | 100.00            | 0.04          | 96.11  | 89.95  | 43.61         |
| 12     | PJ155M  | 2,900,799,072 | 2,900,764,800  | 100.00            | 0.04          | 96.74  | 91.50  | 43.93         |
| 13     | PJ114F  | 2,173,393,728 | 2,173,368,960  | 100.00            | 0.04          | 96.82  | 91.72  | 43.23         |
| 14     | PJ115F  | 2,435,723,712 | 2,435,698,368  | 100.00            | 0.04          | 96.48  | 90.91  | 44.01         |
| 15     | PJ116F  | 1,747,152,000 | 1,747,130,400  | 100.00            | 0.04          | 95.36  | 88.11  | 43.05         |
| 16     | PJ119F  | 1,363,373,280 | 1,363,355,712  | 100.00            | 0.04          | 96.08  | 89.89  | 43.64         |
| 17     | PJ120F  | 2,553,984,864 | 2,553,949,728  | 100.00            | 0.05          | 95.35  | 88.06  | 43.91         |
| 18     | PJ121F  | 2,731,163,904 | 2,731,133,088  | 100.00            | 0.04          | 96.88  | 91.78  | 44.03         |
| 19     | PJ143F  | 1,834,582,464 | 1,834,555,968  | 100.00            | 0.04          | 96.39  | 90.59  | 43.19         |
| 20     | PJ144F  | 2,217,320,640 | 2,217,290,688  | 100.00            | 0.04          | 96.27  | 90.24  | 44.01         |
| 21     | PJ145F  | 2,167,579,008 | 2,167,553,376  | 100.00            | 0.04          | 95.62  | 88.68  | 43.76         |
| 22     | PJ148F  | 1,703,333,952 | 1,703,314,656  | 100.00            | 0.04          | 96.68  | 91.28  | 43.96         |
| 23     | PJ161F  | 2,333,198,592 | 2,333,173,536  | 100.00            | 0.04          | 97.09  | 92.25  | 44.08         |
| 24     | PJ7406F | 2,035,731,744 | 2,035,704,096  | 100.00            | 0.04          | 96.24  | 90.16  | 44.20         |

**Table S11. Quality summary of *A. wuyiensis* (8♂, 12♀) by GBS sequencing**

| Serial | Sample | Raw Base(bp)  | Clean Base(bp) | Effective Rate(%) | Error Rate(%) | Q20(%) | Q30(%) | GC Content(%) |
|--------|--------|---------------|----------------|-------------------|---------------|--------|--------|---------------|
| 1      | YSQ08M | 1,441,715,040 | 1,441,640,448  | 99.99             | 0.04          | 96.15  | 90.19  | 43.66         |
| 2      | YSQ09M | 1,771,709,472 | 1,771,613,568  | 99.99             | 0.04          | 95.95  | 89.53  | 43.01         |
| 3      | YSQ36M | 2,356,529,472 | 2,356,494,048  | 100.00            | 0.04          | 95.78  | 89.11  | 44.17         |
| 4      | YSQ40M | 1,859,647,104 | 1,859,630,112  | 100.00            | 0.05          | 94.18  | 85.43  | 43.70         |
| 5      | YSQ41M | 1,817,822,880 | 1,817,804,160  | 100.00            | 0.04          | 96.16  | 90.12  | 43.06         |
| 6      | YSQ44M | 1,057,004,928 | 1,056,945,888  | 99.99             | 0.04          | 95.86  | 89.54  | 43.36         |
| 7      | YSQ56M | 1,733,434,560 | 1,733,346,432  | 99.99             | 0.04          | 96.12  | 90.12  | 43.02         |
| 8      | YSQ59M | 971,926,848   | 971,879,328    | 100.00            | 0.05          | 95.31  | 88.18  | 43.64         |
| 9      | YSQ18F | 1,503,768,384 | 1,503,673,056  | 99.99             | 0.03          | 96.66  | 91.36  | 43.85         |
| 10     | YSQ19F | 1,571,986,944 | 1,571,917,248  | 100.00            | 0.03          | 95.94  | 89.68  | 43.45         |
| 11     | YSQ20F | 1,582,827,552 | 1,582,764,768  | 100.00            | 0.03          | 95.19  | 87.89  | 43.67         |
| 12     | YSQ35F | 1,567,900,512 | 1,567,881,216  | 100.00            | 0.04          | 96.14  | 90.11  | 43.25         |
| 13     | YSQ37F | 2,583,048,384 | 2,583,018,432  | 100.00            | 0.05          | 95.25  | 87.87  | 43.70         |
| 14     | YSQ38F | 2,735,546,976 | 2,735,519,040  | 100.00            | 0.04          | 96.27  | 90.24  | 43.59         |
| 15     | YSQ39F | 1,696,559,616 | 1,696,538,880  | 100.00            | 0.04          | 95.66  | 88.85  | 44.08         |
| 16     | YSQ42F | 2,159,686,080 | 2,159,663,616  | 100.00            | 0.04          | 96.37  | 90.53  | 43.88         |
| 17     | YSQ43F | 1,920,002,400 | 1,919,964,672  | 100.00            | 0.03          | 96.03  | 89.54  | 43.02         |
| 18     | YSQ45F | 1,042,810,848 | 1,042,755,552  | 99.99             | 0.04          | 95.58  | 88.94  | 43.41         |
| 19     | YSQ46F | 1,343,911,680 | 1,343,846,016  | 100.00            | 0.04          | 95.95  | 89.77  | 43.08         |
| 20     | YSQ57F | 1,599,984,000 | 1,599,909,696  | 100.00            | 0.04          | 95.94  | 89.71  | 43.78         |

Table S12. Quality summary of *A. xindugiao* (10♂, 10♀) by GBS sequencing

| Serial | Sample  | Raw Base(bp)  | Clean Base(bp) | Effective Rate(%) | Error Rate(%) | Q20(%) | Q30(%) | GC Content(%) |
|--------|---------|---------------|----------------|-------------------|---------------|--------|--------|---------------|
| 1      | xm6962M | 3,037,070,880 | 2,999,713,248  | 98.04             | 0.03          | 95.75  | 89.06  | 44.62         |
| 2      | xm6963M | 2,871,851,328 | 2,808,228,672  | 96.57             | 0.03          | 96.86  | 92.00  | 44.68         |
| 3      | xm6965M | 3,403,996,128 | 3,360,809,376  | 98.06             | 0.03          | 96.46  | 91.03  | 44.76         |
| 4      | xm6966M | 3,146,573,664 | 3,095,291,520  | 97.54             | 0.03          | 96.64  | 91.58  | 45.05         |
| 5      | xm6969M | 3,248,957,952 | 3,198,638,592  | 97.78             | 0.03          | 96.56  | 91.23  | 44.84         |
| 6      | xm6970M | 2,451,777,984 | 2,417,828,544  | 97.80             | 0.03          | 96.27  | 90.42  | 44.15         |
| 7      | xm6972M | 2,899,848,384 | 2,847,703,968  | 97.39             | 0.03          | 96.09  | 89.89  | 44.24         |
| 8      | xm6973M | 3,447,077,760 | 3,399,854,976  | 97.91             | 0.03          | 95.86  | 89.35  | 44.73         |
| 9      | xm6974M | 3,140,776,512 | 3,080,302,848  | 97.00             | 0.03          | 95.88  | 89.38  | 45.01         |
| 10     | xm6988M | 3,223,574,784 | 3,172,661,856  | 97.38             | 0.03          | 96.40  | 90.83  | 45.00         |
| 11     | xm6961F | 3,150,419,040 | 3,114,325,440  | 98.14             | 0.03          | 94.72  | 86.51  | 44.12         |
| 12     | xm6964F | 2,423,266,272 | 2,405,527,776  | 98.72             | 0.04          | 92.65  | 82.10  | 44.21         |
| 13     | xm6967F | 3,046,049,568 | 2,983,961,376  | 97.00             | 0.03          | 95.62  | 88.73  | 44.34         |
| 14     | xm6971F | 3,512,104,128 | 3,432,028,032  | 96.87             | 0.03          | 95.80  | 89.09  | 44.48         |
| 15     | xm6975F | 3,258,797,184 | 3,211,950,240  | 97.79             | 0.03          | 96.45  | 90.91  | 44.13         |
| 16     | xm6976F | 2,823,986,592 | 2,780,961,408  | 97.52             | 0.03          | 96.36  | 90.78  | 44.69         |
| 17     | xm6978F | 3,006,267,552 | 2,962,451,808  | 97.68             | 0.03          | 96.06  | 90.06  | 44.70         |
| 18     | xm6979F | 2,947,009,824 | 2,901,694,464  | 97.40             | 0.03          | 96.62  | 91.30  | 44.41         |
| 19     | xm6980F | 2,999,314,080 | 2,954,251,296  | 97.28             | 0.03          | 96.50  | 91.03  | 44.61         |
| 20     | xm6986F | 3,277,192,320 | 3,211,748,064  | 96.91             | 0.03          | 96.31  | 90.60  | 44.84         |
